# Supplementary material for: Evolution and regulation of microbial secondary metabolism
Source: eLife journal article supplement (doi:10.7554/elife.76119), 2022-11-21

A

 Non-changing Metabolites (IS)  
 Putative Metabolites  
 Variable Metabolites

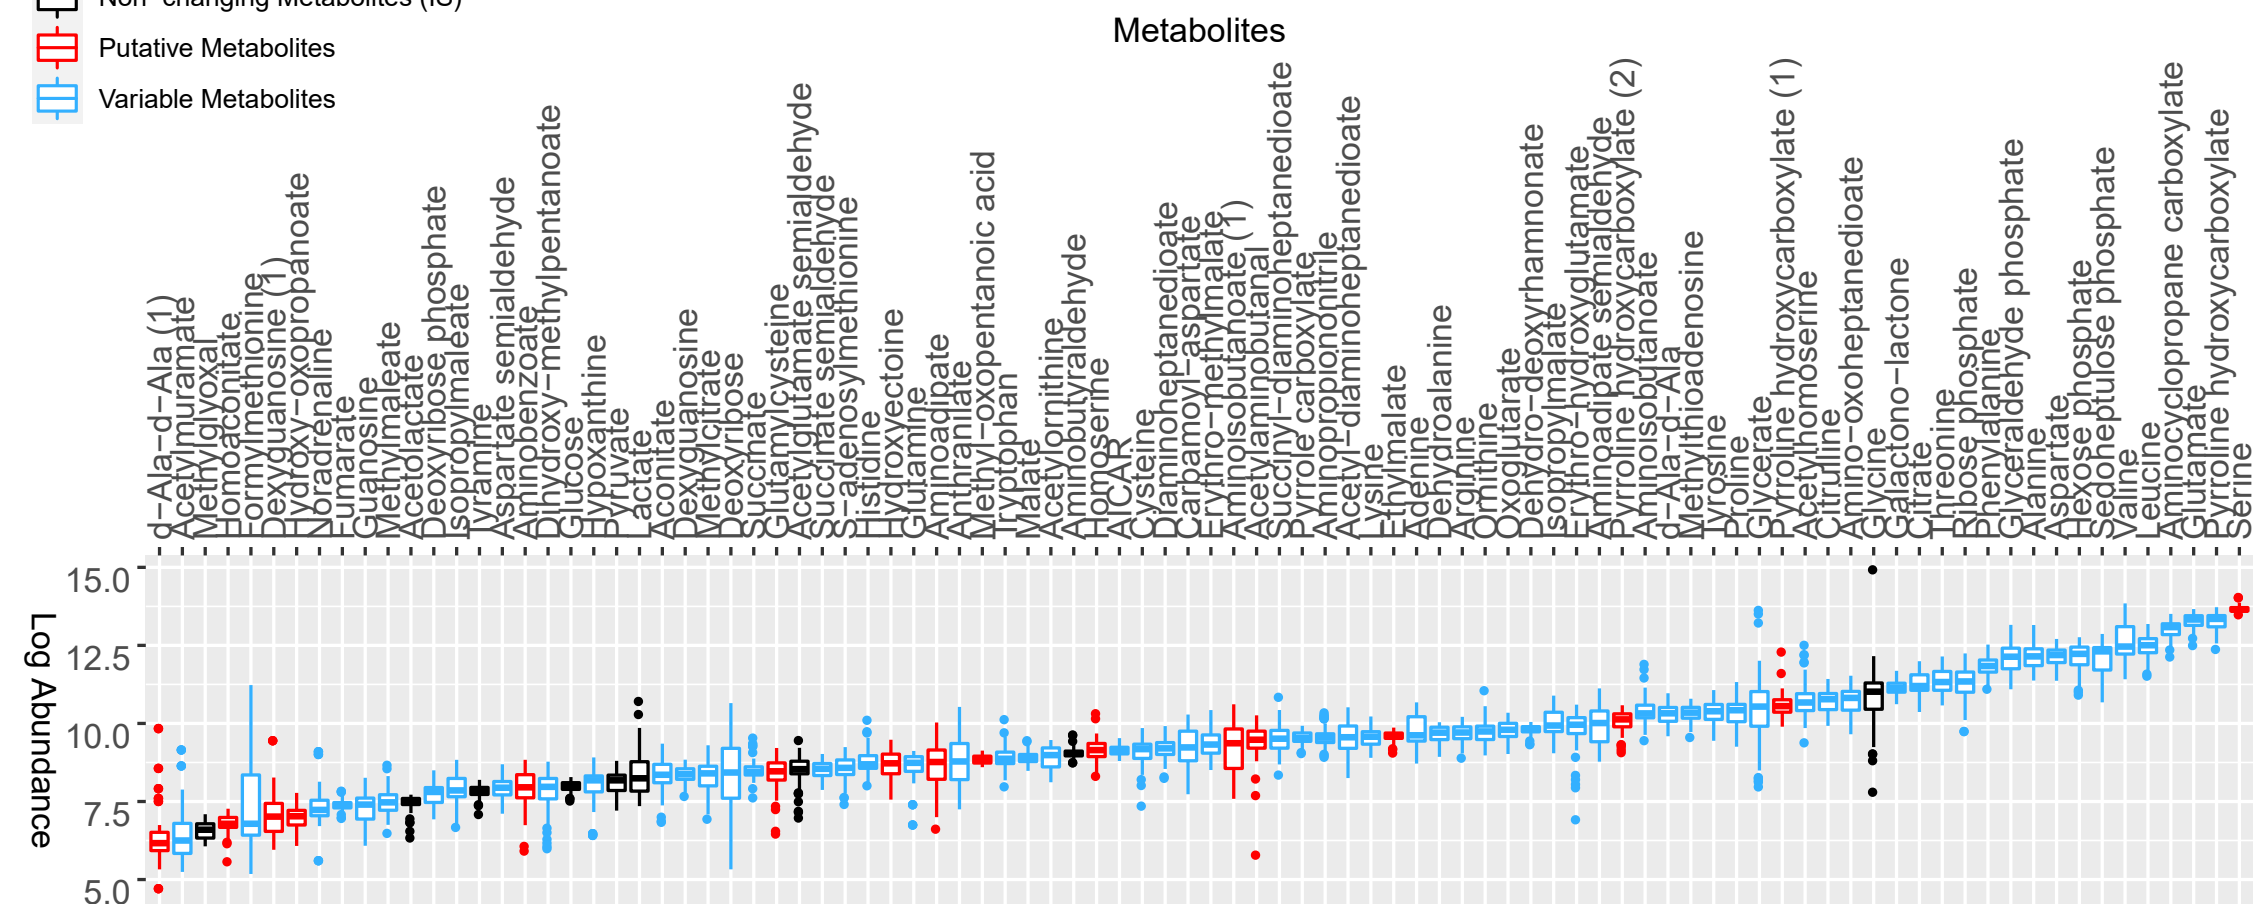

B Pre-Imputation

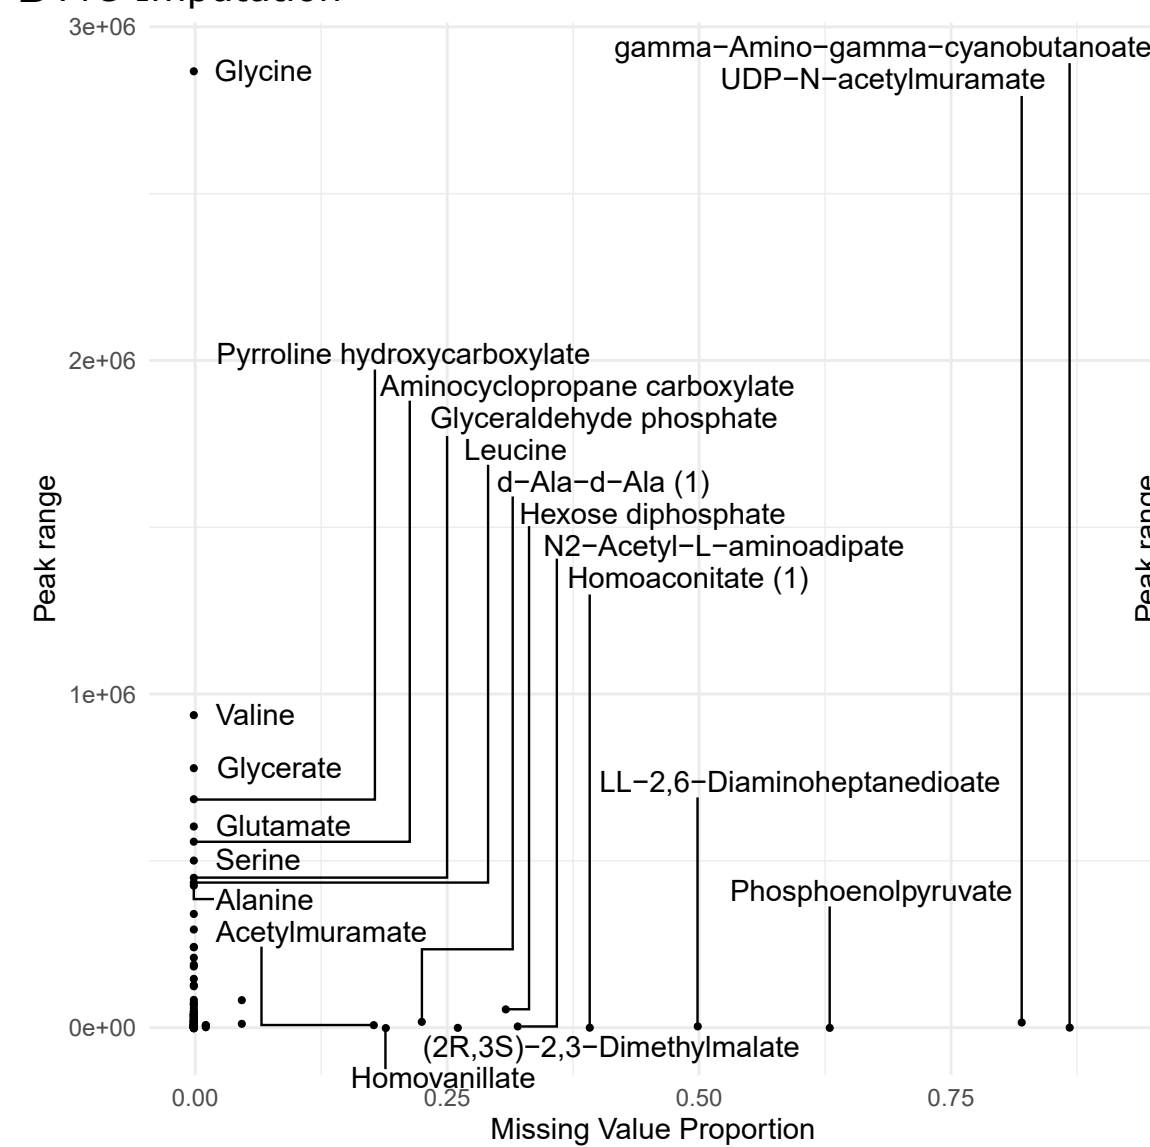

Post-Imputation

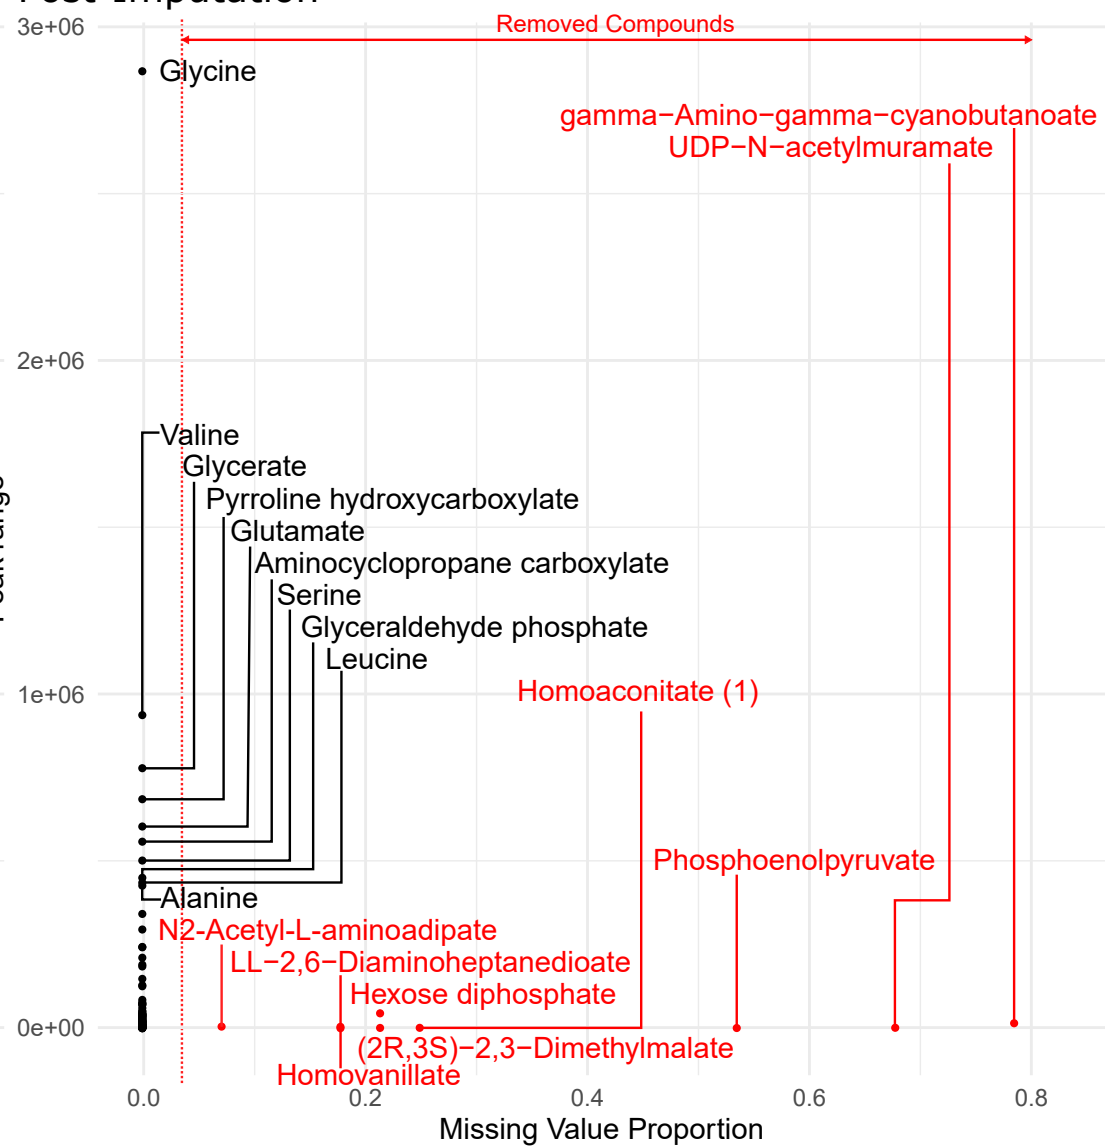

Supplement: supp [file elife-76119-supp-v1.zip]
