# Supplementary material for: Evolution and regulation of microbial secondary metabolism
Source: eLife journal article supplement (doi:10.7554/elife.76119), 2022-11-21

**A. Growth and surfactant production in 190 carbon sources**

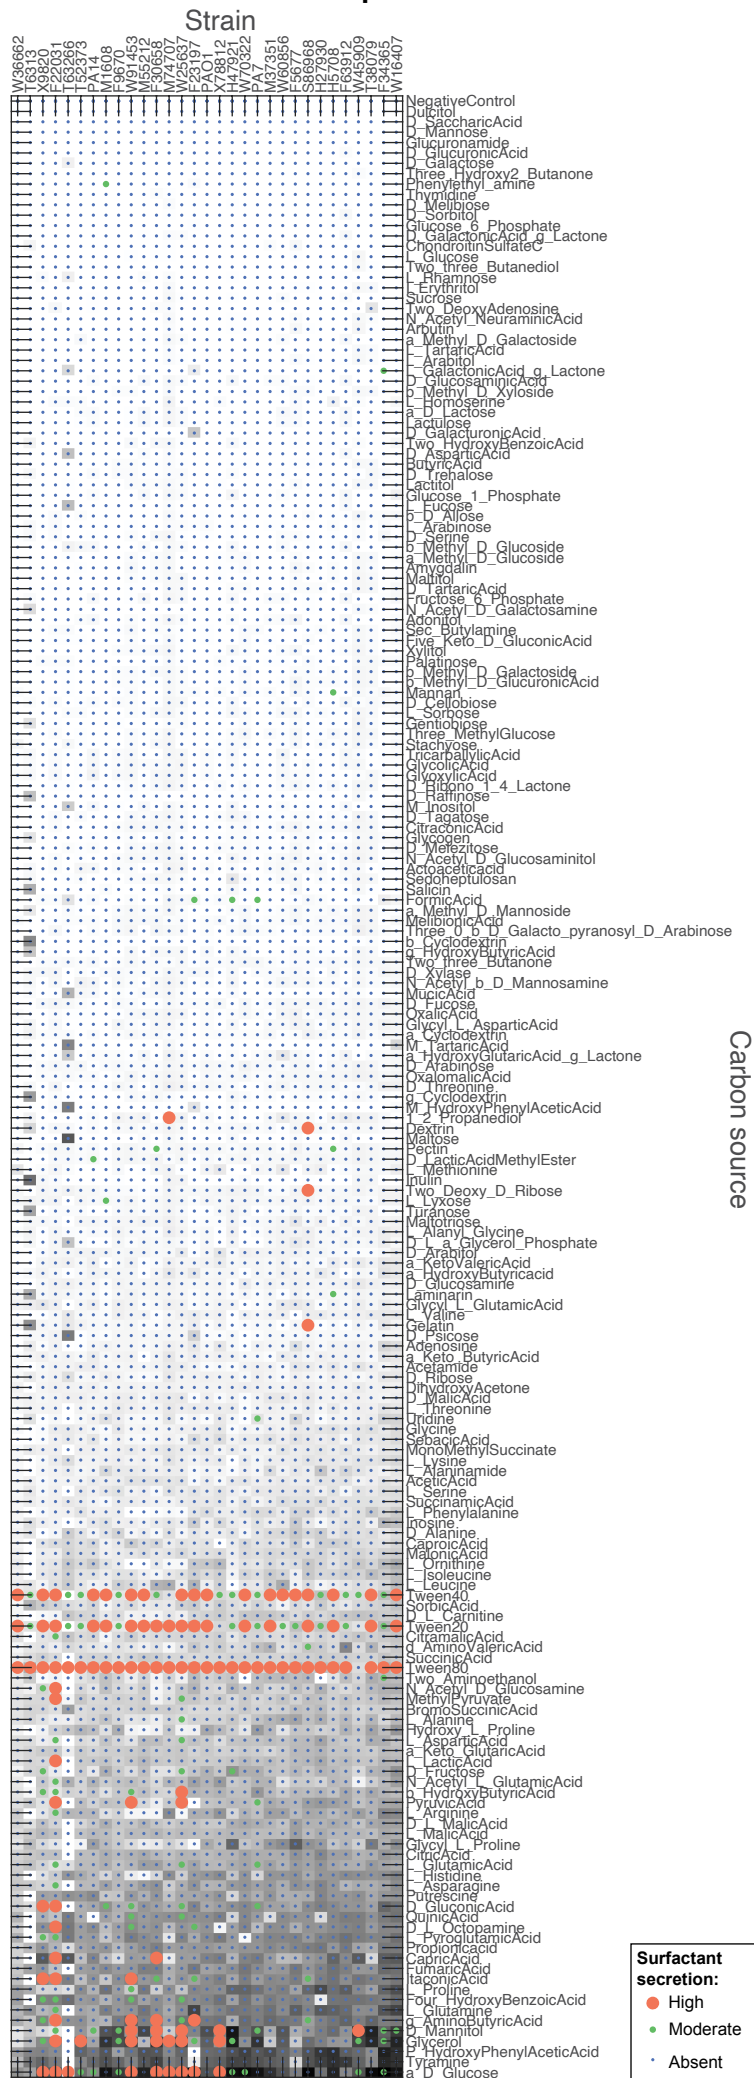

**B. Tuning the LASSO penalty with 3-fold cross validation**

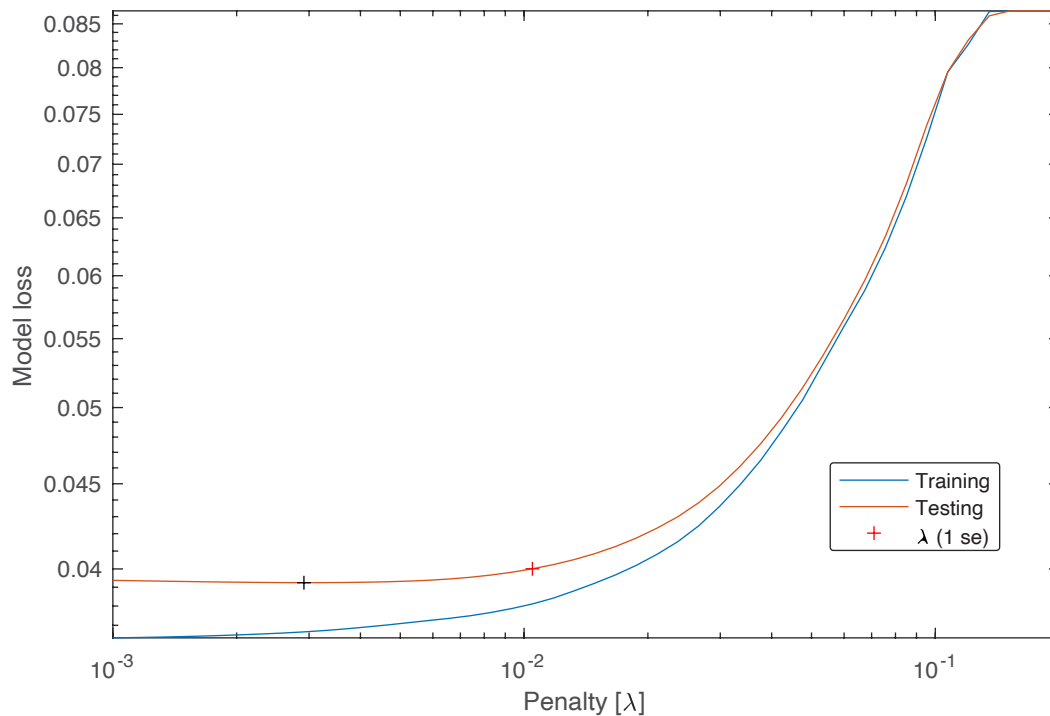

**C. Parameter shrinkage selected the most relevant carbon sources**

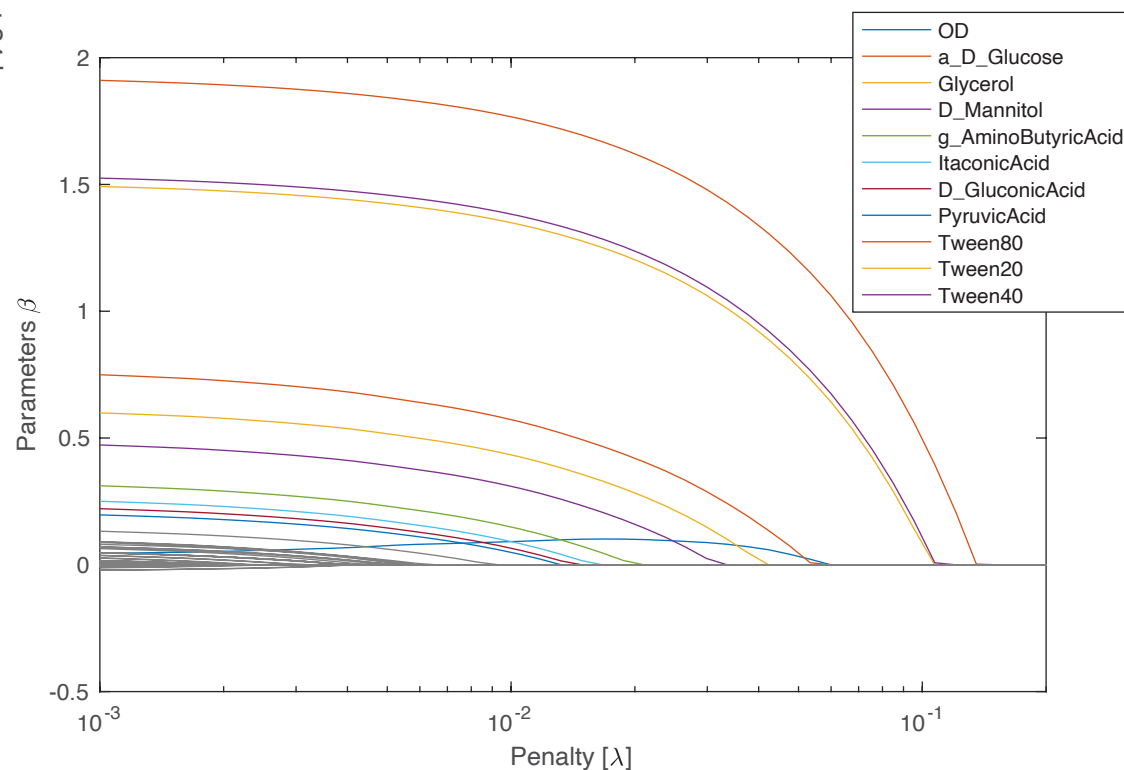

Supplement: supp [file elife-76119-supp-v1.zip]
