# Supplementary material for: Evolution and regulation of microbial secondary metabolism
Source: eLife journal article supplement (doi:10.7554/elife.76119), 2022-11-21
Supplement: supp [file elife-76119-supp-v1.zip]

Archive with 20 entries (20 files):
- elife_poa_e76119_Figure_1_figure_supplement_1.pdf
- elife_poa_e76119_Figure_1_figure_supplement_2.pdf
- elife_poa_e76119_Figure_2_figure_supplement_1.pdf
- elife_poa_e76119_Figure_2_figure_supplement_2.pdf
- elife_poa_e76119_Figure_3_figure_supplement_1.pdf
- elife_poa_e76119_Figure_3_figure_supplement_2.pdf
- elife_poa_e76119_Figure_3_figure_supplement_3.pdf
- elife_poa_e76119_Figure_3_figure_supplement_4.pdf
- elife_poa_e76119_Figure_4_figure_supplement_1.pdf
- elife_poa_e76119_Figure_5_figure_supplement_1.pdf
- elife_poa_e76119_Figure_5_figure_supplement_2.pdf
- elife_poa_e76119_Figure_7_figure_supplement_1.pdf
- elife_poa_e76119_Supplementary_file_1.xlsx
- elife_poa_e76119_Supplementary_file_2.xlsx
- elife_poa_e76119_Supplementary_file_3.xlsx
- elife_poa_e76119_Supplementary_file_4.xlsx
- elife_poa_e76119_Supplementary_file_5.tsv
- elife_poa_e76119_Supplementary_file_6.csv
- elife_poa_e76119_Supplementary_file_7.tsv
- elife_poa_e76119_Transparent_Reporting_File.docx
