# Supplementary material for: Evolution and regulation of microbial secondary metabolism
Source: eLife journal article supplement (doi:10.7554/elife.76119), 2022-11-21
Supplement: supp [file elife-76119-supp-v1.zip › elife_poa_e76119_Supplementary_file_6.csv]

patric_id	Strain	Count	Replicate	Gene	LocusTag
fig|287.6770.peg.1	F22031	5488.49801474351	1	dnaA	PA14_00010
fig|287.6770.peg.1	F30658	7013.42888281135	1	dnaA	PA14_00010
fig|287.6770.peg.1	F34365	8189.181280131	1	dnaA	PA14_00010
fig|287.6770.peg.1	M1608	7265.42467189648	1	dnaA	PA14_00010
fig|287.6770.peg.1	M37351	6731.13116358174	1	dnaA	PA14_00010
fig|287.6770.peg.1	UCBPP-PA14	6603.6802351019	1	dnaA	PA14_00010
fig|287.6770.peg.1	W16407	6572.47696214483	1	dnaA	PA14_00010
fig|287.6770.peg.1	W25637	9336.1803853101	1	dnaA	PA14_00010
fig|287.6770.peg.1	W36662	7092.95894901635	1	dnaA	PA14_00010
fig|287.6770.peg.1	W91453	7987.79109295202	1	dnaA	PA14_00010
fig|287.6770.peg.1	X9820	4910.26045451895	1	dnaA	PA14_00010
fig|287.6770.peg.1	F22031	5612.00831559077	2	dnaA	PA14_00010
fig|287.6770.peg.1	F30658	7369.79847875919	2	dnaA	PA14_00010
fig|287.6770.peg.1	F34365	6996.92477701865	2	dnaA	PA14_00010
fig|287.6770.peg.1	M1608	7083.71198904253	2	dnaA	PA14_00010
fig|287.6770.peg.1	M37351	8254.12111345601	2	dnaA	PA14_00010
fig|287.6770.peg.1	UCBPP-PA14	6239.99537995997	2	dnaA	PA14_00010
fig|287.6770.peg.1	W16407	7818.32021311611	2	dnaA	PA14_00010
fig|287.6770.peg.1	W25637	8904.86387295348	2	dnaA	PA14_00010
fig|287.6770.peg.1	W36662	6559.60821502305	2	dnaA	PA14_00010
fig|287.6770.peg.1	W91453	7339.05184806078	2	dnaA	PA14_00010
fig|287.6770.peg.1	X9820	7096.0342533825	2	dnaA	PA14_00010
fig|287.6770.peg.1	F22031	5460.33059560357	3	dnaA	PA14_00010
fig|287.6770.peg.1	F30658	8112.55315669985	3	dnaA	PA14_00010
fig|287.6770.peg.1	F34365	6665.68607649587	3	dnaA	PA14_00010
fig|287.6770.peg.1	M1608	6384.87941800227	3	dnaA	PA14_00010
fig|287.6770.peg.1	M37351	7679.88048167599	3	dnaA	PA14_00010
fig|287.6770.peg.1	UCBPP-PA14	5944.60125303294	3	dnaA	PA14_00010
fig|287.6770.peg.1	W16407	5994.57665883731	3	dnaA	PA14_00010
fig|287.6770.peg.1	W25637	7416.44579956224	3	dnaA	PA14_00010
fig|287.6770.peg.1	W36662	6967.83934430167	3	dnaA	PA14_00010
fig|287.6770.peg.1	W91453	8374.28492270747	3	dnaA	PA14_00010
fig|287.6770.peg.1	X9820	5603.62435085493	3	dnaA	PA14_00010
fig|287.6770.peg.10	F22031	1303.21955763721	1	glyQ	PA14_00100
fig|287.6770.peg.10	F30658	2121.22466457253	1	glyQ	PA14_00100
fig|287.6770.peg.10	F34365	2027.09389141068	1	glyQ	PA14_00100
fig|287.6770.peg.10	M1608	1634.50406057266	1	glyQ	PA14_00100
fig|287.6770.peg.10	M37351	1495.51591221991	1	glyQ	PA14_00100
fig|287.6770.peg.10	UCBPP-PA14	1457.19218460846	1	glyQ	PA14_00100
fig|287.6770.peg.10	W16407	1368.34644611477	1	glyQ	PA14_00100
fig|287.6770.peg.10	W25637	2644.84933084403	1	glyQ	PA14_00100
fig|287.6770.peg.10	W36662	1854.52268551746	1	glyQ	PA14_00100
fig|287.6770.peg.10	W91453	2146.80472118897	1	glyQ	PA14_00100
fig|287.6770.peg.10	X9820	1006.10081247174	1	glyQ	PA14_00100
fig|287.6770.peg.10	F22031	1093.64092195453	2	glyQ	PA14_00100
fig|287.6770.peg.10	F30658	1926.73712783785	2	glyQ	PA14_00100
fig|287.6770.peg.10	F34365	1602.75852825832	2	glyQ	PA14_00100
fig|287.6770.peg.10	M1608	1646.34547941263	2	glyQ	PA14_00100
fig|287.6770.peg.10	M37351	2107.06236198612	2	glyQ	PA14_00100
fig|287.6770.peg.10	UCBPP-PA14	1204.51986164255	2	glyQ	PA14_00100
fig|287.6770.peg.10	W16407	1666.05592340504	2	glyQ	PA14_00100
fig|287.6770.peg.10	W25637	2511.08159226674	2	glyQ	PA14_00100
fig|287.6770.peg.10	W36662	1893.12222382099	2	glyQ	PA14_00100
fig|287.6770.peg.10	W91453	2075.82670884931	2	glyQ	PA14_00100
fig|287.6770.peg.10	X9820	1945.90861793338	2	glyQ	PA14_00100
fig|287.6770.peg.10	F22031	1228.5743840108	3	glyQ	PA14_00100
fig|287.6770.peg.10	F30658	2273.47179630822	3	glyQ	PA14_00100
fig|287.6770.peg.10	F34365	1637.70426005487	3	glyQ	PA14_00100
fig|287.6770.peg.10	M1608	1262.46280701017	3	glyQ	PA14_00100
fig|287.6770.peg.10	M37351	2170.23807839917	3	glyQ	PA14_00100
fig|287.6770.peg.10	UCBPP-PA14	1100.76808144677	3	glyQ	PA14_00100
fig|287.6770.peg.10	W16407	1369.56310301956	3	glyQ	PA14_00100
fig|287.6770.peg.10	W25637	1986.81881337966	3	glyQ	PA14_00100
fig|287.6770.peg.10	W36662	1978.11594044653	3	glyQ	PA14_00100
fig|287.6770.peg.10	W91453	2610.91141305959	3	glyQ	PA14_00100
fig|287.6770.peg.10	X9820	1577.11778115016	3	glyQ	PA14_00100
fig|287.6770.peg.100	F22031	0.796588971660887	1	PA14_01130	PA14_01130
fig|287.6770.peg.100	F30658	0.0	1	PA14_01130	PA14_01130
fig|287.6770.peg.100	F34365	64.2970201304716	1	PA14_01130	PA14_01130
fig|287.6770.peg.100	M1608	37.8858557086378	1	PA14_01130	PA14_01130
fig|287.6770.peg.100	M37351	66.7874881989628	1	PA14_01130	PA14_01130
fig|287.6770.peg.100	UCBPP-PA14	38.8451778535406	1	PA14_01130	PA14_01130
fig|287.6770.peg.100	W16407	0.0	1	PA14_01130	PA14_01130
fig|287.6770.peg.100	W25637	0.0	1	PA14_01130	PA14_01130
fig|287.6770.peg.100	W36662	0.0	1	PA14_01130	PA14_01130
fig|287.6770.peg.100	W91453	0.0	1	PA14_01130	PA14_01130
fig|287.6770.peg.100	X9820	0.0	1	PA14_01130	PA14_01130
fig|287.6770.peg.100	F22031	0.0	2	PA14_01130	PA14_01130
fig|287.6770.peg.100	F30658	1.15859117729275	2	PA14_01130	PA14_01130
fig|287.6770.peg.100	F34365	178.746304266727	2	PA14_01130	PA14_01130
fig|287.6770.peg.100	M1608	55.6873145681634	2	PA14_01130	PA14_01130
fig|287.6770.peg.100	M37351	73.3748327718659	2	PA14_01130	PA14_01130
fig|287.6770.peg.100	UCBPP-PA14	47.8479392362325	2	PA14_01130	PA14_01130
fig|287.6770.peg.100	W16407	0.0	2	PA14_01130	PA14_01130
fig|287.6770.peg.100	W25637	1.18447244918243	2	PA14_01130	PA14_01130
fig|287.6770.peg.100	W36662	0.0	2	PA14_01130	PA14_01130
fig|287.6770.peg.100	W91453	0.0	2	PA14_01130	PA14_01130
fig|287.6770.peg.100	X9820	0.0	2	PA14_01130	PA14_01130
fig|287.6770.peg.100	F22031	0.0	3	PA14_01130	PA14_01130
fig|287.6770.peg.100	F30658	0.0	3	PA14_01130	PA14_01130
fig|287.6770.peg.100	F34365	68.9214217658361	3	PA14_01130	PA14_01130
fig|287.6770.peg.100	M1608	50.7083398937604	3	PA14_01130	PA14_01130
fig|287.6770.peg.100	M37351	79.2292145049524	3	PA14_01130	PA14_01130
fig|287.6770.peg.100	UCBPP-PA14	77.8702694979515	3	PA14_01130	PA14_01130
fig|287.6770.peg.100	W16407	0.0	3	PA14_01130	PA14_01130
fig|287.6770.peg.100	W25637	0.0	3	PA14_01130	PA14_01130
fig|287.6770.peg.100	W36662	0.0	3	PA14_01130	PA14_01130
fig|287.6770.peg.100	W91453	0.0	3	PA14_01130	PA14_01130
fig|287.6770.peg.100	X9820	0.0	3	PA14_01130	PA14_01130
fig|287.6770.peg.1000	F22031	2763.36714269162	1	sltB1	PA14_12080
fig|287.6770.peg.1000	F30658	3028.34250263238	1	sltB1	PA14_12080
fig|287.6770.peg.1000	F34365	3393.8400085084	1	sltB1	PA14_12080
fig|287.6770.peg.1000	M1608	4570.11665148196	1	sltB1	PA14_12080
fig|287.6770.peg.1000	M37351	2900.67228158241	1	sltB1	PA14_12080
fig|287.6770.peg.1000	UCBPP-PA14	2712.19023833823	1	sltB1	PA14_12080
fig|287.6770.peg.1000	W16407	2645.10196075574	1	sltB1	PA14_12080
fig|287.6770.peg.1000	W25637	3785.89978000156	1	sltB1	PA14_12080
fig|287.6770.peg.1000	W36662	2916.19605445474	1	sltB1	PA14_12080
fig|287.6770.peg.1000	W91453	3660.19720399413	1	sltB1	PA14_12080
fig|287.6770.peg.1000	X9820	2821.96717148937	1	sltB1	PA14_12080
fig|287.6770.peg.1000	F22031	2808.29402572243	2	sltB1	PA14_12080
fig|287.6770.peg.1000	F30658	3195.39446697341	2	sltB1	PA14_12080
fig|287.6770.peg.1000	F34365	3206.51009154034	2	sltB1	PA14_12080
fig|287.6770.peg.1000	M1608	4492.11004183185	2	sltB1	PA14_12080
fig|287.6770.peg.1000	M37351	3095.97988426962	2	sltB1	PA14_12080
fig|287.6770.peg.1000	UCBPP-PA14	2897.92084156834	2	sltB1	PA14_12080
fig|287.6770.peg.1000	W16407	2827.80995535262	2	sltB1	PA14_12080
fig|287.6770.peg.1000	W25637	3864.93360168226	2	sltB1	PA14_12080
fig|287.6770.peg.1000	W36662	2864.26331560961	2	sltB1	PA14_12080
fig|287.6770.peg.1000	W91453	3390.71987339901	2	sltB1	PA14_12080
fig|287.6770.peg.1000	X9820	2971.41522930261	2	sltB1	PA14_12080
fig|287.6770.peg.1000	F22031	2750.50770590305	3	sltB1	PA14_12080
fig|287.6770.peg.1000	F30658	3112.35411102195	3	sltB1	PA14_12080
fig|287.6770.peg.1000	F34365	3044.84995444069	3	sltB1	PA14_12080
fig|287.6770.peg.1000	M1608	4130.98113789686	3	sltB1	PA14_12080
fig|287.6770.peg.1000	M37351	3391.86691286067	3	sltB1	PA14_12080
fig|287.6770.peg.1000	UCBPP-PA14	2669.51380191521	3	sltB1	PA14_12080
fig|287.6770.peg.1000	W16407	2774.5909017761	3	sltB1	PA14_12080
fig|287.6770.peg.1000	W25637	3410.57924166986	3	sltB1	PA14_12080
fig|287.6770.peg.1000	W36662	2592.50580547707	3	sltB1	PA14_12080
fig|287.6770.peg.1000	W91453	3412.40642468208	3	sltB1	PA14_12080
fig|287.6770.peg.1000	X9820	3102.43579940037	3	sltB1	PA14_12080
fig|287.6770.peg.1001	F22031	3225.38874625493	1	PA14_12090	PA14_12090
fig|287.6770.peg.1001	F30658	3129.90276948896	1	PA14_12090	PA14_12090
fig|287.6770.peg.1001	F34365	3551.97592288335	1	PA14_12090	PA14_12090
fig|287.6770.peg.1001	M1608	4585.27099376542	1	PA14_12090	PA14_12090
fig|287.6770.peg.1001	M37351	3175.67958593108	1	PA14_12090	PA14_12090
fig|287.6770.peg.1001	UCBPP-PA14	2826.73371149611	1	PA14_12090	PA14_12090
fig|287.6770.peg.1001	W16407	2650.61948674813	1	PA14_12090	PA14_12090
fig|287.6770.peg.1001	W25637	3900.69358776389	1	PA14_12090	PA14_12090
fig|287.6770.peg.1001	W36662	3088.75203400827	1	PA14_12090	PA14_12090
fig|287.6770.peg.1001	W91453	3724.55073049659	1	PA14_12090	PA14_12090
fig|287.6770.peg.1001	X9820	2915.90749011418	1	PA14_12090	PA14_12090
fig|287.6770.peg.1001	F22031	3050.1040788179	2	PA14_12090	PA14_12090
fig|287.6770.peg.1001	F30658	3400.46510535422	2	PA14_12090	PA14_12090
fig|287.6770.peg.1001	F34365	3189.62849613737	2	PA14_12090	PA14_12090
fig|287.6770.peg.1001	M1608	4770.54661467267	2	PA14_12090	PA14_12090
fig|287.6770.peg.1001	M37351	3100.36047130078	2	PA14_12090	PA14_12090
fig|287.6770.peg.1001	UCBPP-PA14	2513.0569824943	2	PA14_12090	PA14_12090
fig|287.6770.peg.1001	W16407	3102.38647326113	2	PA14_12090	PA14_12090
fig|287.6770.peg.1001	W25637	4076.95417008591	2	PA14_12090	PA14_12090
fig|287.6770.peg.1001	W36662	2986.699441795	2	PA14_12090	PA14_12090
fig|287.6770.peg.1001	W91453	3783.97032909305	2	PA14_12090	PA14_12090
fig|287.6770.peg.1001	X9820	3030.35239087555	2	PA14_12090	PA14_12090
fig|287.6770.peg.1001	F22031	3542.79096879455	3	PA14_12090	PA14_12090
fig|287.6770.peg.1001	F30658	3008.75286460791	3	PA14_12090	PA14_12090
fig|287.6770.peg.1001	F34365	3186.79526355366	3	PA14_12090	PA14_12090
fig|287.6770.peg.1001	M1608	4404.6313169787	3	PA14_12090	PA14_12090
fig|287.6770.peg.1001	M37351	3804.07296129859	3	PA14_12090	PA14_12090
fig|287.6770.peg.1001	UCBPP-PA14	2711.09501378305	3	PA14_12090	PA14_12090
fig|287.6770.peg.1001	W16407	2732.86773032082	3	PA14_12090	PA14_12090
fig|287.6770.peg.1001	W25637	3513.90140324351	3	PA14_12090	PA14_12090
fig|287.6770.peg.1001	W36662	3163.01068014828	3	PA14_12090	PA14_12090
fig|287.6770.peg.1001	W91453	3761.54733594529	3	PA14_12090	PA14_12090
fig|287.6770.peg.1001	X9820	3441.90924554823	3	PA14_12090	PA14_12090
fig|287.6770.peg.1002	F22031	4475.23684279086	1	dacC	PA14_12100
fig|287.6770.peg.1002	F30658	4990.30220327074	1	dacC	PA14_12100
fig|287.6770.peg.1002	F34365	4228.83239155412	1	dacC	PA14_12100
fig|287.6770.peg.1002	M1608	8284.01296394871	1	dacC	PA14_12100
fig|287.6770.peg.1002	M37351	5896.94234039078	1	dacC	PA14_12100
fig|287.6770.peg.1002	UCBPP-PA14	4529.94535584365	1	dacC	PA14_12100
fig|287.6770.peg.1002	W16407	4962.46287756302	1	dacC	PA14_12100
fig|287.6770.peg.1002	W25637	5968.13006556341	1	dacC	PA14_12100
fig|287.6770.peg.1002	W36662	4506.43563444547	1	dacC	PA14_12100
fig|287.6770.peg.1002	W91453	5683.35638549859	1	dacC	PA14_12100
fig|287.6770.peg.1002	X9820	4481.89260158981	1	dacC	PA14_12100
fig|287.6770.peg.1002	F22031	4435.93214826279	2	dacC	PA14_12100
fig|287.6770.peg.1002	F30658	6500.85509578963	2	dacC	PA14_12100
fig|287.6770.peg.1002	F34365	5493.46975113074	2	dacC	PA14_12100
fig|287.6770.peg.1002	M1608	7827.63739647877	2	dacC	PA14_12100
fig|287.6770.peg.1002	M37351	6765.81666962071	2	dacC	PA14_12100
fig|287.6770.peg.1002	UCBPP-PA14	4084.75776914533	2	dacC	PA14_12100
fig|287.6770.peg.1002	W16407	5763.91901537831	2	dacC	PA14_12100
fig|287.6770.peg.1002	W25637	5995.79953776144	2	dacC	PA14_12100
fig|287.6770.peg.1002	W36662	4544.04986501667	2	dacC	PA14_12100
fig|287.6770.peg.1002	W91453	5550.553645539	2	dacC	PA14_12100
fig|287.6770.peg.1002	X9820	5679.5778035794	2	dacC	PA14_12100
fig|287.6770.peg.1002	F22031	4286.3595175488	3	dacC	PA14_12100
fig|287.6770.peg.1002	F30658	6325.43165605756	3	dacC	PA14_12100
fig|287.6770.peg.1002	F34365	4479.07192166309	3	dacC	PA14_12100
fig|287.6770.peg.1002	M1608	7891.26682553588	3	dacC	PA14_12100
fig|287.6770.peg.1002	M37351	6716.28192688603	3	dacC	PA14_12100
fig|287.6770.peg.1002	UCBPP-PA14	4365.27122408905	3	dacC	PA14_12100
fig|287.6770.peg.1002	W16407	4114.94778477696	3	dacC	PA14_12100
fig|287.6770.peg.1002	W25637	5549.06361332277	3	dacC	PA14_12100
fig|287.6770.peg.1002	W36662	4513.57125845648	3	dacC	PA14_12100
fig|287.6770.peg.1002	W91453	5755.72808823336	3	dacC	PA14_12100
fig|287.6770.peg.1002	X9820	5412.15022727834	3	dacC	PA14_12100
fig|287.6770.peg.1003	F22031	824.469585669018	1	PA14_12110	PA14_12110
fig|287.6770.peg.1003	F30658	671.682673983249	1	PA14_12110	PA14_12110
fig|287.6770.peg.1003	F34365	581.279817125479	1	PA14_12110	PA14_12110
fig|287.6770.peg.1003	M1608	1162.55454374506	1	PA14_12110	PA14_12110
fig|287.6770.peg.1003	M37351	996.574088615896	1	PA14_12110	PA14_12110
fig|287.6770.peg.1003	UCBPP-PA14	671.324355725291	1	PA14_12110	PA14_12110
fig|287.6770.peg.1003	W16407	812.179826081027	1	PA14_12110	PA14_12110
fig|287.6770.peg.1003	W25637	953.936542504941	1	PA14_12110	PA14_12110
fig|287.6770.peg.1003	W36662	861.871708401602	1	PA14_12110	PA14_12110
fig|287.6770.peg.1003	W91453	929.149230962555	1	PA14_12110	PA14_12110
fig|287.6770.peg.1003	X9820	706.43119605859	1	PA14_12110	PA14_12110
fig|287.6770.peg.1003	F22031	826.1843480762	2	PA14_12110	PA14_12110
fig|287.6770.peg.1003	F30658	860.833244728514	2	PA14_12110	PA14_12110
fig|287.6770.peg.1003	F34365	941.397202471428	2	PA14_12110	PA14_12110
fig|287.6770.peg.1003	M1608	1193.70756356371	2	PA14_12110	PA14_12110
fig|287.6770.peg.1003	M37351	1046.96030044632	2	PA14_12110	PA14_12110
fig|287.6770.peg.1003	UCBPP-PA14	581.456478979434	2	PA14_12110	PA14_12110
fig|287.6770.peg.1003	W16407	866.392837384631	2	PA14_12110	PA14_12110
fig|287.6770.peg.1003	W25637	959.422683837765	2	PA14_12110	PA14_12110
fig|287.6770.peg.1003	W36662	812.530655593918	2	PA14_12110	PA14_12110
fig|287.6770.peg.1003	W91453	927.730177210071	2	PA14_12110	PA14_12110
fig|287.6770.peg.1003	X9820	1017.64832315951	2	PA14_12110	PA14_12110
fig|287.6770.peg.1003	F22031	871.511589180648	3	PA14_12110	PA14_12110
fig|287.6770.peg.1003	F30658	977.017309932457	3	PA14_12110	PA14_12110
fig|287.6770.peg.1003	F34365	841.825937282713	3	PA14_12110	PA14_12110
fig|287.6770.peg.1003	M1608	1056.13232054591	3	PA14_12110	PA14_12110
fig|287.6770.peg.1003	M37351	1189.50888263516	3	PA14_12110	PA14_12110
fig|287.6770.peg.1003	UCBPP-PA14	790.043025488926	3	PA14_12110	PA14_12110
fig|287.6770.peg.1003	W16407	754.146324054181	3	PA14_12110	PA14_12110
fig|287.6770.peg.1003	W25637	853.118765287068	3	PA14_12110	PA14_12110
fig|287.6770.peg.1003	W36662	841.494690140038	3	PA14_12110	PA14_12110
fig|287.6770.peg.1003	W91453	996.453257692824	3	PA14_12110	PA14_12110
fig|287.6770.peg.1003	X9820	947.195664456166	3	PA14_12110	PA14_12110
fig|287.6770.peg.1004	F22031	1792.325186237	1	lipB	PA14_12120
fig|287.6770.peg.1004	F30658	1940.03191574887	1	lipB	PA14_12120
fig|287.6770.peg.1004	F34365	1666.50925148979	1	lipB	PA14_12120
fig|287.6770.peg.1004	M1608	3017.87902044806	1	lipB	PA14_12120
fig|287.6770.peg.1004	M37351	2582.44954369323	1	lipB	PA14_12120
fig|287.6770.peg.1004	UCBPP-PA14	1754.00918461756	1	lipB	PA14_12120
fig|287.6770.peg.1004	W16407	2256.6681308909	1	lipB	PA14_12120
fig|287.6770.peg.1004	W25637	2838.85086596236	1	lipB	PA14_12120
fig|287.6770.peg.1004	W36662	2552.92030802624	1	lipB	PA14_12120
fig|287.6770.peg.1004	W91453	2409.28034051925	1	lipB	PA14_12120
fig|287.6770.peg.1004	X9820	2010.32281857099	1	lipB	PA14_12120
fig|287.6770.peg.1004	F22031	1729.30825850096	2	lipB	PA14_12120
fig|287.6770.peg.1004	F30658	2050.70638380817	2	lipB	PA14_12120
fig|287.6770.peg.1004	F34365	2021.81930826142	2	lipB	PA14_12120
fig|287.6770.peg.1004	M1608	3059.94654152754	2	lipB	PA14_12120
fig|287.6770.peg.1004	M37351	2682.01440982537	2	lipB	PA14_12120
fig|287.6770.peg.1004	UCBPP-PA14	1661.15562957094	2	lipB	PA14_12120
fig|287.6770.peg.1004	W16407	2338.82308879841	2	lipB	PA14_12120
fig|287.6770.peg.1004	W25637	2467.25611164699	2	lipB	PA14_12120
fig|287.6770.peg.1004	W36662	2735.33436455076	2	lipB	PA14_12120
fig|287.6770.peg.1004	W91453	2544.56177213786	2	lipB	PA14_12120
fig|287.6770.peg.1004	X9820	2613.86311576008	2	lipB	PA14_12120
fig|287.6770.peg.1004	F22031	1917.53962680902	3	lipB	PA14_12120
fig|287.6770.peg.1004	F30658	2120.94773908754	3	lipB	PA14_12120
fig|287.6770.peg.1004	F34365	1838.72507353856	3	lipB	PA14_12120
fig|287.6770.peg.1004	M1608	2810.81573721448	3	lipB	PA14_12120
fig|287.6770.peg.1004	M37351	2314.77786161766	3	lipB	PA14_12120
fig|287.6770.peg.1004	UCBPP-PA14	1889.29906286778	3	lipB	PA14_12120
fig|287.6770.peg.1004	W16407	1956.81674125262	3	lipB	PA14_12120
fig|287.6770.peg.1004	W25637	2416.22192524082	3	lipB	PA14_12120
fig|287.6770.peg.1004	W36662	2664.91603956995	3	lipB	PA14_12120
fig|287.6770.peg.1004	W91453	2631.29920349831	3	lipB	PA14_12120
fig|287.6770.peg.1004	X9820	2380.01410609933	3	lipB	PA14_12120
fig|287.6770.peg.1005	F22031	5965.65480876838	1	lis	PA14_12130
fig|287.6770.peg.1005	F30658	6209.02540554962	1	lis	PA14_12130
fig|287.6770.peg.1005	F34365	5950.94987667027	1	lis	PA14_12130
fig|287.6770.peg.1005	M1608	9129.40877276146	1	lis	PA14_12130
fig|287.6770.peg.1005	M37351	7540.43837352212	1	lis	PA14_12130
fig|287.6770.peg.1005	UCBPP-PA14	5510.03907399452	1	lis	PA14_12130
fig|287.6770.peg.1005	W16407	7006.15450514734	1	lis	PA14_12130
fig|287.6770.peg.1005	W25637	7477.66863763801	1	lis	PA14_12130
fig|287.6770.peg.1005	W36662	7968.45349790902	1	lis	PA14_12130
fig|287.6770.peg.1005	W91453	8019.60631953751	1	lis	PA14_12130
fig|287.6770.peg.1005	X9820	6374.79002187978	1	lis	PA14_12130
fig|287.6770.peg.1005	F22031	5878.54894229828	2	lis	PA14_12130
fig|287.6770.peg.1005	F30658	6486.95200166211	2	lis	PA14_12130
fig|287.6770.peg.1005	F34365	6896.62823962455	2	lis	PA14_12130
fig|287.6770.peg.1005	M1608	8834.29269828788	2	lis	PA14_12130
fig|287.6770.peg.1005	M37351	8250.83567318265	2	lis	PA14_12130
fig|287.6770.peg.1005	UCBPP-PA14	5438.02231145703	2	lis	PA14_12130
fig|287.6770.peg.1005	W16407	7474.82608314291	2	lis	PA14_12130
fig|287.6770.peg.1005	W25637	7856.60575542703	2	lis	PA14_12130
fig|287.6770.peg.1005	W36662	8639.1672673536	2	lis	PA14_12130
fig|287.6770.peg.1005	W91453	7609.33544299599	2	lis	PA14_12130
fig|287.6770.peg.1005	X9820	7688.35272719059	2	lis	PA14_12130
fig|287.6770.peg.1005	F22031	6735.47838763569	3	lis	PA14_12130
fig|287.6770.peg.1005	F30658	7598.8636432302	3	lis	PA14_12130
fig|287.6770.peg.1005	F34365	7345.87486987537	3	lis	PA14_12130
fig|287.6770.peg.1005	M1608	8708.72023589219	3	lis	PA14_12130
fig|287.6770.peg.1005	M37351	7476.45412010923	3	lis	PA14_12130
fig|287.6770.peg.1005	UCBPP-PA14	6246.25404458326	3	lis	PA14_12130
fig|287.6770.peg.1005	W16407	6697.61209785878	3	lis	PA14_12130
fig|287.6770.peg.1005	W25637	7136.81242649593	3	lis	PA14_12130
fig|287.6770.peg.1005	W36662	7970.61137401223	3	lis	PA14_12130
fig|287.6770.peg.1005	W91453	7921.93082234819	3	lis	PA14_12130
fig|287.6770.peg.1005	X9820	7138.19232676585	3	lis	PA14_12130
fig|287.6770.peg.1006	F22031	997.32939251943	1	PA14_12140	PA14_12140
fig|287.6770.peg.1006	F30658	662.449922450834	1	PA14_12140	PA14_12140
fig|287.6770.peg.1006	F34365	445.734747661242	1	PA14_12140	PA14_12140
fig|287.6770.peg.1006	M1608	554.215946366358	1	PA14_12140	PA14_12140
fig|287.6770.peg.1006	M37351	597.158718014256	1	PA14_12140	PA14_12140
fig|287.6770.peg.1006	UCBPP-PA14	425.304895986201	1	PA14_12140	PA14_12140
fig|287.6770.peg.1006	W16407	538.510536858072	1	PA14_12140	PA14_12140
fig|287.6770.peg.1006	W25637	397.186574857653	1	PA14_12140	PA14_12140
fig|287.6770.peg.1006	W36662	549.454566473097	1	PA14_12140	PA14_12140
fig|287.6770.peg.1006	W91453	528.566605317998	1	PA14_12140	PA14_12140
fig|287.6770.peg.1006	X9820	515.732349250221	1	PA14_12140	PA14_12140
fig|287.6770.peg.1006	F22031	988.306997310665	2	PA14_12140	PA14_12140
fig|287.6770.peg.1006	F30658	573.502632759912	2	PA14_12140	PA14_12140
fig|287.6770.peg.1006	F34365	389.269729291983	2	PA14_12140	PA14_12140
fig|287.6770.peg.1006	M1608	505.469470695637	2	PA14_12140	PA14_12140
fig|287.6770.peg.1006	M37351	388.77709901511	2	PA14_12140	PA14_12140
fig|287.6770.peg.1006	UCBPP-PA14	429.591280534	2	PA14_12140	PA14_12140
fig|287.6770.peg.1006	W16407	504.301891457468	2	PA14_12140	PA14_12140
fig|287.6770.peg.1006	W25637	465.497672528693	2	PA14_12140	PA14_12140
fig|287.6770.peg.1006	W36662	422.961163185875	2	PA14_12140	PA14_12140
fig|287.6770.peg.1006	W91453	490.649949364382	2	PA14_12140	PA14_12140
fig|287.6770.peg.1006	X9820	392.914410486295	2	PA14_12140	PA14_12140
fig|287.6770.peg.1006	F22031	1048.16934374429	3	PA14_12140	PA14_12140
fig|287.6770.peg.1006	F30658	716.575287697148	3	PA14_12140	PA14_12140
fig|287.6770.peg.1006	F34365	567.781236451888	3	PA14_12140	PA14_12140
fig|287.6770.peg.1006	M1608	628.608558338167	3	PA14_12140	PA14_12140
fig|287.6770.peg.1006	M37351	506.424573795169	3	PA14_12140	PA14_12140
fig|287.6770.peg.1006	UCBPP-PA14	572.308679708246	3	PA14_12140	PA14_12140
fig|287.6770.peg.1006	W16407	623.761413256432	3	PA14_12140	PA14_12140
fig|287.6770.peg.1006	W25637	530.829453956398	3	PA14_12140	PA14_12140
fig|287.6770.peg.1006	W36662	492.609016783412	3	PA14_12140	PA14_12140
fig|287.6770.peg.1006	W91453	444.708678944751	3	PA14_12140	PA14_12140
fig|287.6770.peg.1006	X9820	485.622777186999	3	PA14_12140	PA14_12140
fig|287.6770.peg.1007	F22031	172.859806850412	1	PA14_12150	PA14_12150
fig|287.6770.peg.1007	F30658	195.041876122284	1	PA14_12150	PA14_12150
fig|287.6770.peg.1007	F34365	147.709370570002	1	PA14_12150	PA14_12150
fig|287.6770.peg.1007	M1608	171.027577198993	1	PA14_12150	PA14_12150
fig|287.6770.peg.1007	M37351	362.747730021818	1	PA14_12150	PA14_12150
fig|287.6770.peg.1007	UCBPP-PA14	186.25764765672	1	PA14_12150	PA14_12150
fig|287.6770.peg.1007	W16407	240.564133268565	1	PA14_12150	PA14_12150
fig|287.6770.peg.1007	W25637	393.742760624783	1	PA14_12150	PA14_12150
fig|287.6770.peg.1007	W36662	170.739600821392	1	PA14_12150	PA14_12150
fig|287.6770.peg.1007	W91453	513.382065356742	1	PA14_12150	PA14_12150
fig|287.6770.peg.1007	X9820	166.274363965918	1	PA14_12150	PA14_12150
fig|287.6770.peg.1007	F22031	151.131283184671	2	PA14_12150	PA14_12150
fig|287.6770.peg.1007	F30658	199.277682494353	2	PA14_12150	PA14_12150
fig|287.6770.peg.1007	F34365	142.997043413382	2	PA14_12150	PA14_12150
fig|287.6770.peg.1007	M1608	152.783145097269	2	PA14_12150	PA14_12150
fig|287.6770.peg.1007	M37351	570.571460808091	2	PA14_12150	PA14_12150
fig|287.6770.peg.1007	UCBPP-PA14	167.467787326814	2	PA14_12150	PA14_12150
fig|287.6770.peg.1007	W16407	226.443582498256	2	PA14_12150	PA14_12150
fig|287.6770.peg.1007	W25637	363.633041899005	2	PA14_12150	PA14_12150
fig|287.6770.peg.1007	W36662	224.466231339872	2	PA14_12150	PA14_12150
fig|287.6770.peg.1007	W91453	325.070810124789	2	PA14_12150	PA14_12150
fig|287.6770.peg.1007	X9820	188.598917033422	2	PA14_12150	PA14_12150
fig|287.6770.peg.1007	F22031	169.163183157914	3	PA14_12150	PA14_12150
fig|287.6770.peg.1007	F30658	211.519211428676	3	PA14_12150	PA14_12150
fig|287.6770.peg.1007	F34365	156.714185205651	3	PA14_12150	PA14_12150
fig|287.6770.peg.1007	M1608	148.627892792056	3	PA14_12150	PA14_12150
fig|287.6770.peg.1007	M37351	472.163291847081	3	PA14_12150	PA14_12150
fig|287.6770.peg.1007	UCBPP-PA14	195.80970679582	3	PA14_12150	PA14_12150
fig|287.6770.peg.1007	W16407	221.132808712982	3	PA14_12150	PA14_12150
fig|287.6770.peg.1007	W25637	287.216650979979	3	PA14_12150	PA14_12150
fig|287.6770.peg.1007	W36662	145.917592944752	3	PA14_12150	PA14_12150
fig|287.6770.peg.1007	W91453	300.719908971236	3	PA14_12150	PA14_12150
fig|287.6770.peg.1007	X9820	189.624132044447	3	PA14_12150	PA14_12150
fig|287.6770.peg.1008	F22031	3540.04139006098	1	PA14_12160	PA14_12160
fig|287.6770.peg.1008	F30658	3406.88531546143	1	PA14_12160	PA14_12160
fig|287.6770.peg.1008	F34365	2677.8840005691	1	PA14_12160	PA14_12160
fig|287.6770.peg.1008	M1608	4002.91126887264	1	PA14_12160	PA14_12160
fig|287.6770.peg.1008	M37351	2634.83188737869	1	PA14_12160	PA14_12160
fig|287.6770.peg.1008	UCBPP-PA14	4376.55670483224	1	PA14_12160	PA14_12160
fig|287.6770.peg.1008	W16407	1465.45490358098	1	PA14_12160	PA14_12160
fig|287.6770.peg.1008	W25637	2713.72561550142	1	PA14_12160	PA14_12160
fig|287.6770.peg.1008	W36662	2479.35696937447	1	PA14_12160	PA14_12160
fig|287.6770.peg.1008	W91453	3016.66193896948	1	PA14_12160	PA14_12160
fig|287.6770.peg.1008	X9820	2740.23909428578	1	PA14_12160	PA14_12160
fig|287.6770.peg.1008	F22031	2819.28539177222	2	PA14_12160	PA14_12160
fig|287.6770.peg.1008	F30658	3319.36372294373	2	PA14_12160	PA14_12160
fig|287.6770.peg.1008	F34365	2389.24226703192	2	PA14_12160	PA14_12160
fig|287.6770.peg.1008	M1608	3896.68413991072	2	PA14_12160	PA14_12160
fig|287.6770.peg.1008	M37351	3194.54309247064	2	PA14_12160	PA14_12160
fig|287.6770.peg.1008	UCBPP-PA14	3904.80791071341	2	PA14_12160	PA14_12160
fig|287.6770.peg.1008	W16407	1284.27423117368	2	PA14_12160	PA14_12160
fig|287.6770.peg.1008	W25637	2597.54808105706	2	PA14_12160	PA14_12160
fig|287.6770.peg.1008	W36662	2988.55453461599	2	PA14_12160	PA14_12160
fig|287.6770.peg.1008	W91453	3158.17858226106	2	PA14_12160	PA14_12160
fig|287.6770.peg.1008	X9820	3344.68391926459	2	PA14_12160	PA14_12160
fig|287.6770.peg.1008	F22031	3044.40197031348	3	PA14_12160	PA14_12160
fig|287.6770.peg.1008	F30658	3257.68363724165	3	PA14_12160	PA14_12160
fig|287.6770.peg.1008	F34365	2198.10105846042	3	PA14_12160	PA14_12160
fig|287.6770.peg.1008	M1608	3455.16136655415	3	PA14_12160	PA14_12160
fig|287.6770.peg.1008	M37351	2942.18758729202	3	PA14_12160	PA14_12160
fig|287.6770.peg.1008	UCBPP-PA14	3479.96942232108	3	PA14_12160	PA14_12160
fig|287.6770.peg.1008	W16407	1288.20291868176	3	PA14_12160	PA14_12160
fig|287.6770.peg.1008	W25637	2810.55237675128	3	PA14_12160	PA14_12160
fig|287.6770.peg.1008	W36662	2909.57486082318	3	PA14_12160	PA14_12160
fig|287.6770.peg.1008	W91453	2990.63400998089	3	PA14_12160	PA14_12160
fig|287.6770.peg.1008	X9820	3137.58563851105	3	PA14_12160	PA14_12160
fig|287.6770.peg.1009	F22031	23.1010801781657	1	fig|287.6770.peg.1009
fig|287.6770.peg.1009	F30658	25.3900667141434	1	fig|287.6770.peg.1009
fig|287.6770.peg.1009	F34365	30.4107527644122	1	fig|287.6770.peg.1009
fig|287.6770.peg.1009	M1608	127.729456389122	1	fig|287.6770.peg.1009
fig|287.6770.peg.1009	M37351	69.4066053832359	1	fig|287.6770.peg.1009
fig|287.6770.peg.1009	UCBPP-PA14	102.591110741402	1	fig|287.6770.peg.1009
fig|287.6770.peg.1009	W16407	30.8981455574304	1	fig|287.6770.peg.1009
fig|287.6770.peg.1009	W25637	36.7340184839448	1	fig|287.6770.peg.1009
fig|287.6770.peg.1009	W36662	40.8685214732056	1	fig|287.6770.peg.1009
fig|287.6770.peg.1009	W91453	26.0306399335813	1	fig|287.6770.peg.1009
fig|287.6770.peg.1009	X9820	36.6367242636769	1	fig|287.6770.peg.1009
fig|287.6770.peg.1009	F22031	25.6465207828532	2	fig|287.6770.peg.1009
fig|287.6770.peg.1009	F30658	22.0132323685623	2	fig|287.6770.peg.1009
fig|287.6770.peg.1009	F34365	33.7631908059373	2	fig|287.6770.peg.1009
fig|287.6770.peg.1009	M1608	118.514028439938	2	fig|287.6770.peg.1009
fig|287.6770.peg.1009	M37351	73.3748327718659	2	fig|287.6770.peg.1009
fig|287.6770.peg.1009	UCBPP-PA14	84.2539799594529	2	fig|287.6770.peg.1009
fig|287.6770.peg.1009	W16407	18.596815953963	2	fig|287.6770.peg.1009
fig|287.6770.peg.1009	W25637	26.0583938820134	2	fig|287.6770.peg.1009
fig|287.6770.peg.1009	W36662	23.1886602623835	2	fig|287.6770.peg.1009
fig|287.6770.peg.1009	W91453	26.7848607593459	2	fig|287.6770.peg.1009
fig|287.6770.peg.1009	X9820	25.5394366816092	2	fig|287.6770.peg.1009
fig|287.6770.peg.1009	F22031	26.7663264490371	3	fig|287.6770.peg.1009
fig|287.6770.peg.1009	F30658	25.9003116035114	3	fig|287.6770.peg.1009
fig|287.6770.peg.1009	F34365	31.9992315341382	3	fig|287.6770.peg.1009
fig|287.6770.peg.1009	M1608	81.3082001744778	3	fig|287.6770.peg.1009
fig|287.6770.peg.1009	M37351	67.4518988352973	3	fig|287.6770.peg.1009
fig|287.6770.peg.1009	UCBPP-PA14	68.0419830564625	3	fig|287.6770.peg.1009
fig|287.6770.peg.1009	W16407	27.1200614459318	3	fig|287.6770.peg.1009
fig|287.6770.peg.1009	W25637	29.3852019154434	3	fig|287.6770.peg.1009
fig|287.6770.peg.1009	W36662	37.3022418054254	3	fig|287.6770.peg.1009
fig|287.6770.peg.1009	W91453	31.8559225605123	3	fig|287.6770.peg.1009
fig|287.6770.peg.1009	X9820	44.3997967713828	3	fig|287.6770.peg.1009
fig|287.6770.peg.101	F22031	113.912222947507	1	PA14_01140	PA14_01140
fig|287.6770.peg.101	F30658	43.855569778975	1	PA14_01140	PA14_01140
fig|287.6770.peg.101	F34365	434.439325205889	1	PA14_01140	PA14_01140
fig|287.6770.peg.101	M1608	114.74002014616	1	PA14_01140	PA14_01140
fig|287.6770.peg.101	M37351	255.363925466623	1	PA14_01140	PA14_01140
fig|287.6770.peg.101	UCBPP-PA14	127.491865775723	1	PA14_01140	PA14_01140
fig|287.6770.peg.101	W16407	137.938149809957	1	PA14_01140	PA14_01140
fig|287.6770.peg.101	W25637	252.54637707712	1	PA14_01140	PA14_01140
fig|287.6770.peg.101	W36662	75.3797173839125	1	PA14_01140	PA14_01140
fig|287.6770.peg.101	W91453	127.260906341953	1	PA14_01140	PA14_01140
fig|287.6770.peg.101	X9820	186.001830877129	1	PA14_01140	PA14_01140
fig|287.6770.peg.101	F22031	287.607411636282	2	PA14_01140	PA14_01140
fig|287.6770.peg.101	F30658	35.9163264960753	2	PA14_01140	PA14_01140
fig|287.6770.peg.101	F34365	1279.0291105308	2	PA14_01140	PA14_01140
fig|287.6770.peg.101	M1608	115.658268718493	2	PA14_01140	PA14_01140
fig|287.6770.peg.101	M37351	479.674279911601	2	PA14_01140	PA14_01140
fig|287.6770.peg.101	UCBPP-PA14	200.753310273758	2	PA14_01140	PA14_01140
fig|287.6770.peg.101	W16407	370.842388729028	2	PA14_01140	PA14_01140
fig|287.6770.peg.101	W25637	230.972127590573	2	PA14_01140	PA14_01140
fig|287.6770.peg.101	W36662	76.0588056606179	2	PA14_01140	PA14_01140
fig|287.6770.peg.101	W91453	149.751721518161	2	PA14_01140	PA14_01140
fig|287.6770.peg.101	X9820	321.207530572547	2	PA14_01140	PA14_01140
fig|287.6770.peg.101	F22031	118.307162904744	3	PA14_01140	PA14_01140
fig|287.6770.peg.101	F30658	31.6559364042917	3	PA14_01140	PA14_01140
fig|287.6770.peg.101	F34365	303.582453016183	3	PA14_01140	PA14_01140
fig|287.6770.peg.101	M1608	193.216260629673	3	PA14_01140	PA14_01140
fig|287.6770.peg.101	M37351	384.368756855107	3	PA14_01140	PA14_01140
fig|287.6770.peg.101	UCBPP-PA14	340.209915282313	3	PA14_01140	PA14_01140
fig|287.6770.peg.101	W16407	327.526895923946	3	PA14_01140	PA14_01140
fig|287.6770.peg.101	W25637	267.310546456615	3	PA14_01140	PA14_01140
fig|287.6770.peg.101	W36662	76.798733128817	3	PA14_01140	PA14_01140
fig|287.6770.peg.101	W91453	200.055193680017	3	PA14_01140	PA14_01140
fig|287.6770.peg.101	X9820	278.423725587213	3	PA14_01140	PA14_01140
fig|287.6770.peg.1010	F22031	26.2874360648093	1	PA14_12180	PA14_12180
fig|287.6770.peg.1010	F30658	33.4687243050073	1	PA14_12180	PA14_12180
fig|287.6770.peg.1010	F34365	72.1169279841776	1	PA14_12180	PA14_12180
fig|287.6770.peg.1010	M1608	114.74002014616	1	PA14_12180	PA14_12180
fig|287.6770.peg.1010	M37351	165.004382609202	1	PA14_12180	PA14_12180
fig|287.6770.peg.1010	UCBPP-PA14	66.7340234919799	1	PA14_12180	PA14_12180
fig|287.6770.peg.1010	W16407	78.3488690920556	1	PA14_12180	PA14_12180
fig|287.6770.peg.1010	W25637	74.6159750455129	1	PA14_12180	PA14_12180
fig|287.6770.peg.1010	W36662	77.196096116055	1	PA14_12180	PA14_12180
fig|287.6770.peg.1010	W91453	58.5689398505579	1	PA14_12180	PA14_12180
fig|287.6770.peg.1010	X9820	51.6671752436469	1	PA14_12180	PA14_12180
fig|287.6770.peg.1010	F22031	27.4784151244856	2	PA14_12180	PA14_12180
fig|287.6770.peg.1010	F30658	38.2335088506608	2	PA14_12180	PA14_12180
fig|287.6770.peg.1010	F34365	69.5124516592827	2	PA14_12180	PA14_12180
fig|287.6770.peg.1010	M1608	149.927385375825	2	PA14_12180	PA14_12180
fig|287.6770.peg.1010	M37351	97.4680614432248	2	PA14_12180	PA14_12180
fig|287.6770.peg.1010	UCBPP-PA14	113.378812538029	2	PA14_12180	PA14_12180
fig|287.6770.peg.1010	W16407	112.674826074011	2	PA14_12180	PA14_12180
fig|287.6770.peg.1010	W25637	93.5733234854116	2	PA14_12180	PA14_12180
fig|287.6770.peg.1010	W36662	89.0444554075527	2	PA14_12180	PA14_12180
fig|287.6770.peg.1010	W91453	57.2222025313299	2	PA14_12180	PA14_12180
fig|287.6770.peg.1010	X9820	31.4331528389036	2	PA14_12180	PA14_12180
fig|287.6770.peg.1010	F22031	42.2907957894786	3	PA14_12180	PA14_12180
fig|287.6770.peg.1010	F30658	44.6060922060474	3	PA14_12180	PA14_12180
fig|287.6770.peg.1010	F34365	94.3567083698947	3	PA14_12180	PA14_12180
fig|287.6770.peg.1010	M1608	81.3082001744778	3	PA14_12180	PA14_12180
fig|287.6770.peg.1010	M37351	155.246433827272	3	PA14_12180	PA14_12180
fig|287.6770.peg.1010	UCBPP-PA14	90.7226440752833	3	PA14_12180	PA14_12180
fig|287.6770.peg.1010	W16407	106.394087210963	3	PA14_12180	PA14_12180
fig|287.6770.peg.1010	W25637	61.6141330485105	3	PA14_12180	PA14_12180
fig|287.6770.peg.1010	W36662	37.3022418054254	3	PA14_12180	PA14_12180
fig|287.6770.peg.1010	W91453	76.4542141452295	3	PA14_12180	PA14_12180
fig|287.6770.peg.1010	X9820	75.8496528177789	3	PA14_12180	PA14_12180
fig|287.6770.peg.1011	F22031	869.078568082027	1	holA	PA14_12200
fig|287.6770.peg.1011	F30658	1152.93984761042	1	holA	PA14_12200
fig|287.6770.peg.1011	F34365	989.652782819015	1	holA	PA14_12200
fig|287.6770.peg.1011	M1608	1394.19949007787	1	holA	PA14_12200
fig|287.6770.peg.1011	M37351	1483.72988489068	1	holA	PA14_12200
fig|287.6770.peg.1011	UCBPP-PA14	1084.67688929502	1	holA	PA14_12200
fig|287.6770.peg.1011	W16407	1782.16089554465	1	holA	PA14_12200
fig|287.6770.peg.1011	W25637	1532.49733362707	1	holA	PA14_12200
fig|287.6770.peg.1011	W36662	1700.13049328535	1	holA	PA14_12200
fig|287.6770.peg.1011	W91453	1688.37622902534	1	holA	PA14_12200
fig|287.6770.peg.1011	X9820	1426.01403672465	1	holA	PA14_12200
fig|287.6770.peg.1011	F22031	1471.01115633079	2	holA	PA14_12200
fig|287.6770.peg.1011	F30658	1759.89999830769	2	holA	PA14_12200
fig|287.6770.peg.1011	F34365	1977.13273219474	2	holA	PA14_12200
fig|287.6770.peg.1011	M1608	1420.74046141853	2	holA	PA14_12200
fig|287.6770.peg.1011	M37351	1972.35931077807	2	holA	PA14_12200
fig|287.6770.peg.1011	UCBPP-PA14	1104.66329280172	2	holA	PA14_12200
fig|287.6770.peg.1011	W16407	2347.57453160028	2	holA	PA14_12200
fig|287.6770.peg.1011	W25637	1517.30920740269	2	holA	PA14_12200
fig|287.6770.peg.1011	W36662	1516.53838115988	2	holA	PA14_12200
fig|287.6770.peg.1011	W91453	1586.3942531558	2	holA	PA14_12200
fig|287.6770.peg.1011	X9820	1709.17768561539	2	holA	PA14_12200
fig|287.6770.peg.1011	F22031	1137.56887408408	3	holA	PA14_12200
fig|287.6770.peg.1011	F30658	1519.484947406	3	holA	PA14_12200
fig|287.6770.peg.1011	F34365	1447.34985708256	3	holA	PA14_12200
fig|287.6770.peg.1011	M1608	1502.01599892207	3	holA	PA14_12200
fig|287.6770.peg.1011	M37351	1497.86042016795	3	holA	PA14_12200
fig|287.6770.peg.1011	UCBPP-PA14	1285.23745773318	3	holA	PA14_12200
fig|287.6770.peg.1011	W16407	1345.57227943277	3	holA	PA14_12200
fig|287.6770.peg.1011	W25637	1430.39579646465	3	holA	PA14_12200
fig|287.6770.peg.1011	W36662	1227.68260530209	3	holA	PA14_12200
fig|287.6770.peg.1011	W91453	1842.54656090003	3	holA	PA14_12200
fig|287.6770.peg.1011	X9820	1699.21722227146	3	holA	PA14_12200
fig|287.6770.peg.1012	F22031	2340.37839873969	1	PA14_12210	PA14_12210
fig|287.6770.peg.1012	F30658	3218.76800298846	1	PA14_12210	PA14_12210
fig|287.6770.peg.1012	F34365	2382.46525942909	1	PA14_12210	PA14_12210
fig|287.6770.peg.1012	M1608	3035.19826877201	1	PA14_12210	PA14_12210
fig|287.6770.peg.1012	M37351	2238.03563396132	1	PA14_12210	PA14_12210
fig|287.6770.peg.1012	UCBPP-PA14	2154.41332556944	1	PA14_12210	PA14_12210
fig|287.6770.peg.1012	W16407	2575.58113325152	1	PA14_12210	PA14_12210
fig|287.6770.peg.1012	W25637	2912.31890293025	1	PA14_12210	PA14_12210
fig|287.6770.peg.1012	W36662	2514.77635465125	1	PA14_12210	PA14_12210
fig|287.6770.peg.1012	W91453	2913.26245256664	1	PA14_12210	PA14_12210
fig|287.6770.peg.1012	X9820	2309.05303179789	1	PA14_12210	PA14_12210
fig|287.6770.peg.1012	F22031	2470.30951969125	2	PA14_12210	PA14_12210
fig|287.6770.peg.1012	F30658	4569.48360324261	2	PA14_12210	PA14_12210
fig|287.6770.peg.1012	F34365	2908.59958442913	2	PA14_12210	PA14_12210
fig|287.6770.peg.1012	M1608	2965.70647071988	2	PA14_12210	PA14_12210
fig|287.6770.peg.1012	M37351	3748.68735191189	2	PA14_12210	PA14_12210
fig|287.6770.peg.1012	UCBPP-PA14	1638.27183254492	2	PA14_12210	PA14_12210
fig|287.6770.peg.1012	W16407	3105.66826431183	2	PA14_12210	PA14_12210
fig|287.6770.peg.1012	W25637	2807.19970456235	2	PA14_12210	PA14_12210
fig|287.6770.peg.1012	W36662	2788.20450994899	2	PA14_12210	PA14_12210
fig|287.6770.peg.1012	W91453	3059.56159491983	2	PA14_12210	PA14_12210
fig|287.6770.peg.1012	X9820	3431.12508957158	2	PA14_12210	PA14_12210
fig|287.6770.peg.1012	F22031	2086.70280996693	3	PA14_12210	PA14_12210
fig|287.6770.peg.1012	F30658	4243.33438437528	3	PA14_12210	PA14_12210
fig|287.6770.peg.1012	F34365	1944.56868553609	3	PA14_12210	PA14_12210
fig|287.6770.peg.1012	M1608	3227.84811875454	3	PA14_12210	PA14_12210
fig|287.6770.peg.1012	M37351	2758.03319682105	3	PA14_12210	PA14_12210
fig|287.6770.peg.1012	UCBPP-PA14	1748.67896455109	3	PA14_12210	PA14_12210
fig|287.6770.peg.1012	W16407	1731.51161539411	3	PA14_12210	PA14_12210
fig|287.6770.peg.1012	W25637	2869.32278058217	3	PA14_12210	PA14_12210
fig|287.6770.peg.1012	W36662	2658.33329101605	3	PA14_12210	PA14_12210
fig|287.6770.peg.1012	W91453	3276.06307612308	3	PA14_12210	PA14_12210
fig|287.6770.peg.1012	X9820	2811.06213308817	3	PA14_12210	PA14_12210
fig|287.6770.peg.1013	F22031	14153.7928484706	1	leuS	PA14_12230
fig|287.6770.peg.1013	F30658	21530.7765735936	1	leuS	PA14_12230
fig|287.6770.peg.1013	F34365	18033.5763892964	1	leuS	PA14_12230
fig|287.6770.peg.1013	M1608	21245.3054283838	1	leuS	PA14_12230
fig|287.6770.peg.1013	M37351	16682.4669052272	1	leuS	PA14_12230
fig|287.6770.peg.1013	UCBPP-PA14	15196.4327823453	1	leuS	PA14_12230
fig|287.6770.peg.1013	W16407	14988.9111109492	1	leuS	PA14_12230
fig|287.6770.peg.1013	W25637	21233.4106217977	1	leuS	PA14_12230
fig|287.6770.peg.1013	W36662	16259.3142207733	1	leuS	PA14_12230
fig|287.6770.peg.1013	W91453	19541.7798568047	1	leuS	PA14_12230
fig|287.6770.peg.1013	X9820	13531.163494718	1	leuS	PA14_12230
fig|287.6770.peg.1013	F22031	12239.8020436167	2	leuS	PA14_12230
fig|287.6770.peg.1013	F30658	23770.8151845154	2	leuS	PA14_12230
fig|287.6770.peg.1013	F34365	16638.3018221612	2	leuS	PA14_12230
fig|287.6770.peg.1013	M1608	22786.1068174039	2	leuS	PA14_12230
fig|287.6770.peg.1013	M37351	21587.5328895376	2	leuS	PA14_12230
fig|287.6770.peg.1013	UCBPP-PA14	13832.2151296396	2	leuS	PA14_12230
fig|287.6770.peg.1013	W16407	17267.6905784298	2	leuS	PA14_12230
fig|287.6770.peg.1013	W25637	22520.3746763055	2	leuS	PA14_12230
fig|287.6770.peg.1013	W36662	17632.6572635164	2	leuS	PA14_12230
fig|287.6770.peg.1013	W91453	20153.172734066	2	leuS	PA14_12230
fig|287.6770.peg.1013	X9820	19009.199179327	2	leuS	PA14_12230
fig|287.6770.peg.1013	F22031	14750.9225060643	3	leuS	PA14_12230
fig|287.6770.peg.1013	F30658	24497.3780583212	3	leuS	PA14_12230
fig|287.6770.peg.1013	F34365	14887.0271014206	3	leuS	PA14_12230
fig|287.6770.peg.1013	M1608	20355.9013404556	3	leuS	PA14_12230
fig|287.6770.peg.1013	M37351	19270.9004307384	3	leuS	PA14_12230
fig|287.6770.peg.1013	UCBPP-PA14	13095.0576502332	3	leuS	PA14_12230
fig|287.6770.peg.1013	W16407	12927.9246754184	3	leuS	PA14_12230
fig|287.6770.peg.1013	W25637	20700.4528848211	3	leuS	PA14_12230
fig|287.6770.peg.1013	W36662	16890.2356645448	3	leuS	PA14_12230
fig|287.6770.peg.1013	W91453	21388.0664071279	3	leuS	PA14_12230
fig|287.6770.peg.1013	X9820	16742.4233658756	3	leuS	PA14_12230
fig|287.6770.peg.1014	F22031	176.842751708717	1	fig|287.6770.peg.1014
fig|287.6770.peg.1014	F30658	109.638924447438	1	fig|287.6770.peg.1014
fig|287.6770.peg.1014	F34365	99.9210447973544	1	fig|287.6770.peg.1014
fig|287.6770.peg.1014	M1608	192.676637603929	1	fig|287.6770.peg.1014
fig|287.6770.peg.1014	M37351	113.931597515878	1	fig|287.6770.peg.1014
fig|287.6770.peg.1014	UCBPP-PA14	97.6109597345378	1	fig|287.6770.peg.1014
fig|287.6770.peg.1014	W16407	115.868045840364	1	fig|287.6770.peg.1014
fig|287.6770.peg.1014	W25637	64.2845323469034	1	fig|287.6770.peg.1014
fig|287.6770.peg.1014	W36662	30.878438446422	1	fig|287.6770.peg.1014
fig|287.6770.peg.1014	W91453	104.845633065814	1	fig|287.6770.peg.1014
fig|287.6770.peg.1014	X9820	193.517056367114	1	fig|287.6770.peg.1014
fig|287.6770.peg.1014	F22031	142.887758647325	2	fig|287.6770.peg.1014
fig|287.6770.peg.1014	F30658	84.5771559423708	2	fig|287.6770.peg.1014
fig|287.6770.peg.1014	F34365	133.066693176341	2	fig|287.6770.peg.1014
fig|287.6770.peg.1014	M1608	134.220706907881	2	fig|287.6770.peg.1014
fig|287.6770.peg.1014	M37351	30.6641092180932	2	fig|287.6770.peg.1014
fig|287.6770.peg.1014	UCBPP-PA14	108.177949577569	2	fig|287.6770.peg.1014
fig|287.6770.peg.1014	W16407	47.0390050600242	2	fig|287.6770.peg.1014
fig|287.6770.peg.1014	W25637	78.1751816460401	2	fig|287.6770.peg.1014
fig|287.6770.peg.1014	W36662	38.9569492408043	2	fig|287.6770.peg.1014
fig|287.6770.peg.1014	W91453	94.96450632859	2	fig|287.6770.peg.1014
fig|287.6770.peg.1014	X9820	64.8308777302388	2	fig|287.6770.peg.1014
fig|287.6770.peg.1014	F22031	139.720224063974	3	fig|287.6770.peg.1014
fig|287.6770.peg.1014	F30658	48.9228108066326	3	fig|287.6770.peg.1014
fig|287.6770.peg.1014	F34365	100.100160183714	3	fig|287.6770.peg.1014
fig|287.6770.peg.1014	M1608	230.81037468884	3	fig|287.6770.peg.1014
fig|287.6770.peg.1014	M37351	101.713180783385	3	fig|287.6770.peg.1014
fig|287.6770.peg.1014	UCBPP-PA14	109.623194924301	3	fig|287.6770.peg.1014
fig|287.6770.peg.1014	W16407	125.169514365839	3	fig|287.6770.peg.1014
fig|287.6770.peg.1014	W25637	56.8745843524712	3	fig|287.6770.peg.1014
fig|287.6770.peg.1014	W36662	41.6907408413578	3	fig|287.6770.peg.1014
fig|287.6770.peg.1014	W91453	81.5511617549114	3	fig|287.6770.peg.1014
fig|287.6770.peg.1014	X9820	117.47446229095	3	fig|287.6770.peg.1014
fig|287.6770.peg.1015	F22031	303.500398202798	1	PA14_12260	PA14_12260
fig|287.6770.peg.1015	F30658	198.50415794694	1	PA14_12260	PA14_12260
fig|287.6770.peg.1015	F34365	226.777327757474	1	PA14_12260	PA14_12260
fig|287.6770.peg.1015	M1608	306.334204729843	1	PA14_12260	PA14_12260
fig|287.6770.peg.1015	M37351	257.983042650896	1	PA14_12260	PA14_12260
fig|287.6770.peg.1015	UCBPP-PA14	225.102825510261	1	PA14_12260	PA14_12260
fig|287.6770.peg.1015	W16407	250.495680054882	1	PA14_12260	PA14_12260
fig|287.6770.peg.1015	W25637	130.864940849053	1	PA14_12260	PA14_12260
fig|287.6770.peg.1015	W36662	91.7271259731947	1	PA14_12260	PA14_12260
fig|287.6770.peg.1015	W91453	190.168286181441	1	PA14_12260	PA14_12260
fig|287.6770.peg.1015	X9820	391.731128665468	1	PA14_12260	PA14_12260
fig|287.6770.peg.1015	F22031	300.430672027709	2	PA14_12260	PA14_12260
fig|287.6770.peg.1015	F30658	126.28643832491	2	PA14_12260	PA14_12260
fig|287.6770.peg.1015	F34365	242.300545783785	2	PA14_12260	PA14_12260
fig|287.6770.peg.1015	M1608	155.638904818713	2	PA14_12260	PA14_12260
fig|287.6770.peg.1015	M37351	93.0874744120686	2	PA14_12260	PA14_12260
fig|287.6770.peg.1015	UCBPP-PA14	221.556762115598	2	PA14_12260	PA14_12260
fig|287.6770.peg.1015	W16407	148.774527631704	2	PA14_12260	PA14_12260
fig|287.6770.peg.1015	W25637	100.680158180506	2	PA14_12260	PA14_12260
fig|287.6770.peg.1015	W36662	76.0588056606179	2	PA14_12260	PA14_12260
fig|287.6770.peg.1015	W91453	169.231620252231	2	PA14_12260	PA14_12260
fig|287.6770.peg.1015	X9820	131.626327512909	2	PA14_12260	PA14_12260
fig|287.6770.peg.1015	F22031	279.975774656928	3	PA14_12260	PA14_12260
fig|287.6770.peg.1015	F30658	87.7732782118997	3	PA14_12260	PA14_12260
fig|287.6770.peg.1015	F34365	267.480755900745	3	PA14_12260	PA14_12260
fig|287.6770.peg.1015	M1608	496.592018269929	3	PA14_12260	PA14_12260
fig|287.6770.peg.1015	M37351	131.691802487961	3	PA14_12260	PA14_12260
fig|287.6770.peg.1015	UCBPP-PA14	220.002411882562	3	PA14_12260	PA14_12260
fig|287.6770.peg.1015	W16407	295.191438046104	3	PA14_12260	PA14_12260
fig|287.6770.peg.1015	W25637	172.519572535829	3	PA14_12260	PA14_12260
fig|287.6770.peg.1015	W36662	87.7699807186481	3	PA14_12260	PA14_12260
fig|287.6770.peg.1015	W91453	192.409772265494	3	PA14_12260	PA14_12260
fig|287.6770.peg.1015	X9820	319.123539294314	3	PA14_12260	PA14_12260
fig|287.6770.peg.1016	F22031	728.082320098051	1	PA14_12270	PA14_12270
fig|287.6770.peg.1016	F30658	715.538243762224	1	PA14_12270	PA14_12270
fig|287.6770.peg.1016	F34365	638.625808052657	1	PA14_12270	PA14_12270
fig|287.6770.peg.1016	M1608	616.998221540672	1	PA14_12270	PA14_12270
fig|287.6770.peg.1016	M37351	496.322706419743	1	PA14_12270	PA14_12270
fig|287.6770.peg.1016	UCBPP-PA14	784.871798681794	1	PA14_12270	PA14_12270
fig|287.6770.peg.1016	W16407	616.859405950128	1	PA14_12270	PA14_12270
fig|287.6770.peg.1016	W25637	619.886561916568	1	PA14_12270	PA14_12270
fig|287.6770.peg.1016	W36662	559.444649499881	1	PA14_12270	PA14_12270
fig|287.6770.peg.1016	W91453	669.56590495823	1	PA14_12270	PA14_12270
fig|287.6770.peg.1016	X9820	608.733264688785	1	PA14_12270	PA14_12270
fig|287.6770.peg.1016	F22031	632.003547863168	2	PA14_12270	PA14_12270
fig|287.6770.peg.1016	F30658	744.974126999239	2	PA14_12270	PA14_12270
fig|287.6770.peg.1016	F34365	620.646889815024	2	PA14_12270	PA14_12270
fig|287.6770.peg.1016	M1608	495.474311670582	2	PA14_12270	PA14_12270
fig|287.6770.peg.1016	M37351	707.464805531722	2	PA14_12270	PA14_12270
fig|287.6770.peg.1016	UCBPP-PA14	711.478052990935	2	PA14_12270	PA14_12270
fig|287.6770.peg.1016	W16407	563.374130370057	2	PA14_12270	PA14_12270
fig|287.6770.peg.1016	W25637	573.284665404294	2	PA14_12270	PA14_12270
fig|287.6770.peg.1016	W36662	615.890816568906	2	PA14_12270	PA14_12270
fig|287.6770.peg.1016	W91453	687.883924046838	2	PA14_12270	PA14_12270
fig|287.6770.peg.1016	X9820	887.986567699028	2	PA14_12270	PA14_12270
fig|287.6770.peg.1016	F22031	650.421732711601	3	PA14_12270	PA14_12270
fig|287.6770.peg.1016	F30658	854.710282915876	3	PA14_12270	PA14_12270
fig|287.6770.peg.1016	F34365	631.779699520165	3	PA14_12270	PA14_12270
fig|287.6770.peg.1016	M1608	481.729228990723	3	PA14_12270	PA14_12270
fig|287.6770.peg.1016	M37351	543.89785092589	3	PA14_12270	PA14_12270
fig|287.6770.peg.1016	UCBPP-PA14	626.742266153416	3	PA14_12270	PA14_12270
fig|287.6770.peg.1016	W16407	637.321443979398	3	PA14_12270	PA14_12270
fig|287.6770.peg.1016	W25637	776.338076411232	3	PA14_12270	PA14_12270
fig|287.6770.peg.1016	W36662	590.253120332908	3	PA14_12270	PA14_12270
fig|287.6770.peg.1016	W91453	681.716742794963	3	PA14_12270	PA14_12270
fig|287.6770.peg.1016	X9820	652.122015079684	3	PA14_12270	PA14_12270
fig|287.6770.peg.1017	F22031	1285.69460026067	1	lnt	PA14_12280
fig|287.6770.peg.1017	F30658	1579.95460598465	1	lnt	PA14_12280
fig|287.6770.peg.1017	F34365	1526.61978877349	1	lnt	PA14_12280
fig|287.6770.peg.1017	M1608	1999.29072839583	1	lnt	PA14_12280
fig|287.6770.peg.1017	M37351	1523.01664265478	1	lnt	PA14_12280
fig|287.6770.peg.1017	UCBPP-PA14	1555.79917454437	1	lnt	PA14_12280
fig|287.6770.peg.1017	W16407	1197.30314035043	1	lnt	PA14_12280
fig|287.6770.peg.1017	W25637	1728.79474490065	1	lnt	PA14_12280
fig|287.6770.peg.1017	W36662	1468.54220493719	1	lnt	PA14_12280
fig|287.6770.peg.1017	W91453	1550.26922271106	1	lnt	PA14_12280
fig|287.6770.peg.1017	X9820	1209.01190070134	1	lnt	PA14_12280
fig|287.6770.peg.1017	F22031	1339.11476373326	2	lnt	PA14_12280
fig|287.6770.peg.1017	F30658	1739.04535711642	2	lnt	PA14_12280
fig|287.6770.peg.1017	F34365	1608.71673840054	2	lnt	PA14_12280
fig|287.6770.peg.1017	M1608	1917.64265294983	2	lnt	PA14_12280
fig|287.6770.peg.1017	M37351	2161.81969987557	2	lnt	PA14_12280
fig|287.6770.peg.1017	UCBPP-PA14	1492.64766965204	2	lnt	PA14_12280
fig|287.6770.peg.1017	W16407	1359.75542533977	2	lnt	PA14_12280
fig|287.6770.peg.1017	W25637	1578.90177476017	2	lnt	PA14_12280
fig|287.6770.peg.1017	W36662	1673.29372453359	2	lnt	PA14_12280
fig|287.6770.peg.1017	W91453	1613.17911391515	2	lnt	PA14_12280
fig|287.6770.peg.1017	X9820	1679.70910482891	2	lnt	PA14_12280
fig|287.6770.peg.1017	F22031	1322.79185311141	3	lnt	PA14_12280
fig|287.6770.peg.1017	F30658	2040.36899187662	3	lnt	PA14_12280
fig|287.6770.peg.1017	F34365	1418.63259801346	3	lnt	PA14_12280
fig|287.6770.peg.1017	M1608	1482.78180103134	3	lnt	PA14_12280
fig|287.6770.peg.1017	M37351	2003.21432890224	3	lnt	PA14_12280
fig|287.6770.peg.1017	UCBPP-PA14	1440.97799672908	3	lnt	PA14_12280
fig|287.6770.peg.1017	W16407	1159.90416645678	3	lnt	PA14_12280
fig|287.6770.peg.1017	W25637	1580.16553525949	3	lnt	PA14_12280
fig|287.6770.peg.1017	W36662	1494.28392173498	3	lnt	PA14_12280
fig|287.6770.peg.1017	W91453	1641.21713031759	3	lnt	PA14_12280
fig|287.6770.peg.1017	X9820	1467.96828075384	3	lnt	PA14_12280
fig|287.6770.peg.1018	F22031	2637.5060851692	1	PA14_12300	PA14_12300
fig|287.6770.peg.1018	F30658	1968.88426428767	1	PA14_12300	PA14_12300
fig|287.6770.peg.1018	F34365	2606.63595123533	1	PA14_12300	PA14_12300
fig|287.6770.peg.1018	M1608	2639.02046336168	1	PA14_12300	PA14_12300
fig|287.6770.peg.1018	M37351	2380.7775205042	1	PA14_12300	PA14_12300
fig|287.6770.peg.1018	UCBPP-PA14	2368.5598188646	1	PA14_12300	PA14_12300
fig|287.6770.peg.1018	W16407	2358.19060915103	1	PA14_12300	PA14_12300
fig|287.6770.peg.1018	W25637	2949.05292141419	1	PA14_12300	PA14_12300
fig|287.6770.peg.1018	W36662	2634.65735097265	1	PA14_12300	PA14_12300
fig|287.6770.peg.1018	W91453	2767.92471293748	1	PA14_12300	PA14_12300
fig|287.6770.peg.1018	X9820	2317.50766047413	1	PA14_12300	PA14_12300
fig|287.6770.peg.1018	F22031	2049.88976828662	2	PA14_12300	PA14_12300
fig|287.6770.peg.1018	F30658	2757.44700195675	2	PA14_12300	PA14_12300
fig|287.6770.peg.1018	F34365	2683.18063404831	2	PA14_12300	PA14_12300
fig|287.6770.peg.1018	M1608	2814.35120548334	2	PA14_12300	PA14_12300
fig|287.6770.peg.1018	M37351	2412.60830740926	2	PA14_12300	PA14_12300
fig|287.6770.peg.1018	UCBPP-PA14	1965.9261990539	2	PA14_12300	PA14_12300
fig|287.6770.peg.1018	W16407	2726.07443278094	2	PA14_12300	PA14_12300
fig|287.6770.peg.1018	W25637	3108.05570665469	2	PA14_12300	PA14_12300
fig|287.6770.peg.1018	W36662	2432.02668831878	2	PA14_12300	PA14_12300
fig|287.6770.peg.1018	W91453	2671.18111390931	2	PA14_12300	PA14_12300
fig|287.6770.peg.1018	X9820	2100.12752404925	2	PA14_12300	PA14_12300
fig|287.6770.peg.1018	F22031	2169.67842195895	3	PA14_12300	PA14_12300
fig|287.6770.peg.1018	F30658	2470.60194573495	3	PA14_12300	PA14_12300
fig|287.6770.peg.1018	F34365	2230.10028999455	3	PA14_12300	PA14_12300
fig|287.6770.peg.1018	M1608	2809.06717376986	3	PA14_12300	PA14_12300
fig|287.6770.peg.1018	M37351	2799.78913419528	3	PA14_12300	PA14_12300
fig|287.6770.peg.1018	UCBPP-PA14	2174.31936967096	3	PA14_12300	PA14_12300
fig|287.6770.peg.1018	W16407	2219.67272142088	3	PA14_12300	PA14_12300
fig|287.6770.peg.1018	W25637	2764.1047995301	3	PA14_12300	PA14_12300
fig|287.6770.peg.1018	W36662	2468.53070771198	3	PA14_12300	PA14_12300
fig|287.6770.peg.1018	W91453	3040.32924917529	3	PA14_12300	PA14_12300
fig|287.6770.peg.1018	X9820	2549.28833129023	3	PA14_12300	PA14_12300
fig|287.6770.peg.1019	F22031	752.776578219538	1	PA14_12310	PA14_12310
fig|287.6770.peg.1019	F30658	657.833546684626	1	PA14_12310	PA14_12310
fig|287.6770.peg.1019	F34365	775.039756167306	1	PA14_12310	PA14_12310
fig|287.6770.peg.1019	M1608	1079.20566118605	1	PA14_12310	PA14_12310
fig|287.6770.peg.1019	M37351	1124.91083064528	1	PA14_12310	PA14_12310
fig|287.6770.peg.1019	UCBPP-PA14	896.427181235551	1	PA14_12310	PA14_12310
fig|287.6770.peg.1019	W16407	770.2466285388	1	PA14_12310	PA14_12310
fig|287.6770.peg.1019	W25637	967.711799436421	1	PA14_12310	PA14_12310
fig|287.6770.peg.1019	W36662	817.370429464112	1	PA14_12310	PA14_12310
fig|287.6770.peg.1019	W91453	865.518777791578	1	PA14_12310	PA14_12310
fig|287.6770.peg.1019	X9820	816.341368849621	1	PA14_12310	PA14_12310
fig|287.6770.peg.1019	F22031	603.609185567867	2	PA14_12310	PA14_12310
fig|287.6770.peg.1019	F30658	1029.98755661326	2	PA14_12310	PA14_12310
fig|287.6770.peg.1019	F34365	810.316579342495	2	PA14_12310	PA14_12310
fig|287.6770.peg.1019	M1608	1070.9098955416	2	PA14_12310	PA14_12310
fig|287.6770.peg.1019	M37351	892.54460759807	2	PA14_12310	PA14_12310
fig|287.6770.peg.1019	UCBPP-PA14	735.402022609052	2	PA14_12310	PA14_12310
fig|287.6770.peg.1019	W16407	972.504081357244	2	PA14_12310	PA14_12310
fig|287.6770.peg.1019	W25637	1037.5978654838	2	PA14_12310	PA14_12310
fig|287.6770.peg.1019	W36662	823.661212519862	2	PA14_12310	PA14_12310
fig|287.6770.peg.1019	W91453	1062.87197467768	2	PA14_12310	PA14_12310
fig|287.6770.peg.1019	X9820	680.724216167507	2	PA14_12310	PA14_12310
fig|287.6770.peg.1019	F22031	672.370120399812	3	PA14_12310	PA14_12310
fig|287.6770.peg.1019	F30658	828.809971312364	3	PA14_12310	PA14_12310
fig|287.6770.peg.1019	F34365	722.854435425019	3	PA14_12310	PA14_12310
fig|287.6770.peg.1019	M1608	1124.32629488579	3	PA14_12310	PA14_12310
fig|287.6770.peg.1019	M37351	1140.25828983479	3	PA14_12310	PA14_12310
fig|287.6770.peg.1019	UCBPP-PA14	740.901593281481	3	PA14_12310	PA14_12310
fig|287.6770.peg.1019	W16407	765.620196204383	3	PA14_12310	PA14_12310
fig|287.6770.peg.1019	W25637	1007.62805277795	3	PA14_12310	PA14_12310
fig|287.6770.peg.1019	W36662	940.235918448517	3	PA14_12310	PA14_12310
fig|287.6770.peg.1019	W91453	1066.53628732595	3	PA14_12310	PA14_12310
fig|287.6770.peg.1019	X9820	891.695918491937	3	PA14_12310	PA14_12310
fig|287.6770.peg.102	F22031	341.73666884252	1	PA14_01150	PA14_01150
fig|287.6770.peg.102	F30658	79.6324819670863	1	PA14_01150	PA14_01150
fig|287.6770.peg.102	F34365	284.123318684651	1	PA14_01150	PA14_01150
fig|287.6770.peg.102	M1608	195.92399666467	1	PA14_01150	PA14_01150
fig|287.6770.peg.102	M37351	306.436710559947	1	PA14_01150	PA14_01150
fig|287.6770.peg.102	UCBPP-PA14	198.210010073194	1	PA14_01150	PA14_01150
fig|287.6770.peg.102	W16407	271.462278825995	1	PA14_01150	PA14_01150
fig|287.6770.peg.102	W25637	296.168024026805	1	PA14_01150	PA14_01150
fig|287.6770.peg.102	W36662	272.45680982137	1	PA14_01150	PA14_01150
fig|287.6770.peg.102	W91453	235.721906065208	1	PA14_01150	PA14_01150
fig|287.6770.peg.102	X9820	340.063953421822	1	PA14_01150	PA14_01150
fig|287.6770.peg.102	F22031	556.895879856241	2	PA14_01150	PA14_01150
fig|287.6770.peg.102	F30658	100.797432424469	2	PA14_01150	PA14_01150
fig|287.6770.peg.102	F34365	621.639924838728	2	PA14_01150	PA14_01150
fig|287.6770.peg.102	M1608	298.426890890927	2	PA14_01150	PA14_01150
fig|287.6770.peg.102	M37351	221.219645073387	2	PA14_01150	PA14_01150
fig|287.6770.peg.102	UCBPP-PA14	238.19952358907	2	PA14_01150	PA14_01150
fig|287.6770.peg.102	W16407	620.258508582179	2	PA14_01150	PA14_01150
fig|287.6770.peg.102	W25637	291.380222498877	2	PA14_01150	PA14_01150
fig|287.6770.peg.102	W36662	226.321324160863	2	PA14_01150	PA14_01150
fig|287.6770.peg.102	W91453	200.886455695094	2	PA14_01150	PA14_01150
fig|287.6770.peg.102	X9820	298.614951969585	2	PA14_01150	PA14_01150
fig|287.6770.peg.102	F22031	286.399693004697	3	PA14_01150	PA14_01150
fig|287.6770.peg.102	F30658	71.9453100097539	3	PA14_01150	PA14_01150
fig|287.6770.peg.102	F34365	335.581684550321	3	PA14_01150	PA14_01150
fig|287.6770.peg.102	M1608	206.330486464266	3	PA14_01150	PA14_01150
fig|287.6770.peg.102	M37351	414.347378559684	3	PA14_01150	PA14_01150
fig|287.6770.peg.102	UCBPP-PA14	297.872681380514	3	PA14_01150	PA14_01150
fig|287.6770.peg.102	W16407	432.877903848527	3	PA14_01150	PA14_01150
fig|287.6770.peg.102	W25637	323.237221069878	3	PA14_01150	PA14_01150
fig|287.6770.peg.102	W36662	234.784698422384	3	PA14_01150	PA14_01150
fig|287.6770.peg.102	W91453	220.442984118745	3	PA14_01150	PA14_01150
fig|287.6770.peg.102	X9820	346.873412276428	3	PA14_01150	PA14_01150
fig|287.6770.peg.1020	F22031	4074.55259004544	1	PA14_12330	PA14_12330
fig|287.6770.peg.1020	F30658	3980.47000441276	1	PA14_12330	PA14_12330
fig|287.6770.peg.1020	F34365	4492.10262262889	1	PA14_12330	PA14_12330
fig|287.6770.peg.1020	M1608	5522.67530929914	1	PA14_12330	PA14_12330
fig|287.6770.peg.1020	M37351	4355.59187744609	1	PA14_12330	PA14_12330
fig|287.6770.peg.1020	UCBPP-PA14	4349.66388939517	1	PA14_12330	PA14_12330
fig|287.6770.peg.1020	W16407	3876.61376225903	1	PA14_12330	PA14_12330
fig|287.6770.peg.1020	W25637	4993.53063766125	1	PA14_12330	PA14_12330
fig|287.6770.peg.1020	W36662	4330.24689742765	1	PA14_12330	PA14_12330
fig|287.6770.peg.1020	W91453	4459.91630862026	1	PA14_12330	PA14_12330
fig|287.6770.peg.1020	X9820	4308.1030121339	1	PA14_12330	PA14_12330
fig|287.6770.peg.1020	F22031	3419.23078865682	2	PA14_12330	PA14_12330
fig|287.6770.peg.1020	F30658	4665.64667095791	2	PA14_12330	PA14_12330
fig|287.6770.peg.1020	F34365	4218.41278069475	2	PA14_12330	PA14_12330
fig|287.6770.peg.1020	M1608	5808.61527341766	2	PA14_12330	PA14_12330
fig|287.6770.peg.1020	M37351	4169.22370690289	2	PA14_12330	PA14_12330
fig|287.6770.peg.1020	UCBPP-PA14	4181.49382020988	2	PA14_12330	PA14_12330
fig|287.6770.peg.1020	W16407	4167.87463438819	2	PA14_12330	PA14_12330
fig|287.6770.peg.1020	W25637	5187.98932741903	2	PA14_12330	PA14_12330
fig|287.6770.peg.1020	W36662	4433.67184216773	2	PA14_12330	PA14_12330
fig|287.6770.peg.1020	W91453	4176.0032911162	2	PA14_12330	PA14_12330
fig|287.6770.peg.1020	X9820	3668.83830791578	2	PA14_12330	PA14_12330
fig|287.6770.peg.1020	F22031	3445.89686704904	3	PA14_12330	PA14_12330
fig|287.6770.peg.1020	F30658	4663.49499483224	3	PA14_12330	PA14_12330
fig|287.6770.peg.1020	F34365	4132.00333348513	3	PA14_12330	PA14_12330
fig|287.6770.peg.1020	M1608	5298.14723717565	3	PA14_12330	PA14_12330
fig|287.6770.peg.1020	M37351	4428.27069179031	3	PA14_12330	PA14_12330
fig|287.6770.peg.1020	UCBPP-PA14	3947.94706134275	3	PA14_12330	PA14_12330
fig|287.6770.peg.1020	W16407	3551.68497013069	3	PA14_12330	PA14_12330
fig|287.6770.peg.1020	W25637	4988.84895745093	3	PA14_12330	PA14_12330
fig|287.6770.peg.1020	W36662	4754.93870543276	3	PA14_12330	PA14_12330
fig|287.6770.peg.1020	W91453	4834.45480778334	3	PA14_12330	PA14_12330
fig|287.6770.peg.1020	X9820	4676.77859325232	3	PA14_12330	PA14_12330
fig|287.6770.peg.1021	F22031	2489.34053644027	1	PA14_12350	PA14_12350
fig|287.6770.peg.1021	F30658	4593.29388737686	1	PA14_12350	PA14_12350
fig|287.6770.peg.1021	F34365	5288.86434505649	1	PA14_12350	PA14_12350
fig|287.6770.peg.1021	M1608	4048.37429572301	1	PA14_12350	PA14_12350
fig|287.6770.peg.1021	M37351	3648.43023769236	1	PA14_12350	PA14_12350
fig|287.6770.peg.1021	UCBPP-PA14	4595.68334913426	1	PA14_12350	PA14_12350
fig|287.6770.peg.1021	W16407	3109.67764931567	1	PA14_12350	PA14_12350
fig|287.6770.peg.1021	W25637	7528.17791305344	1	PA14_12350	PA14_12350
fig|287.6770.peg.1021	W36662	3137.79425977612	1	PA14_12350	PA14_12350
fig|287.6770.peg.1021	W91453	6601.65951648881	1	PA14_12350	PA14_12350
fig|287.6770.peg.1021	X9820	2382.32648032525	1	PA14_12350	PA14_12350
fig|287.6770.peg.1021	F22031	2249.56625152455	2	PA14_12350	PA14_12350
fig|287.6770.peg.1021	F30658	3683.16135261366	2	PA14_12350	PA14_12350
fig|287.6770.peg.1021	F34365	3535.20468438638	2	PA14_12350	PA14_12350
fig|287.6770.peg.1021	M1608	4309.34141965942	2	PA14_12350	PA14_12350
fig|287.6770.peg.1021	M37351	4114.46636901343	2	PA14_12350	PA14_12350
fig|287.6770.peg.1021	UCBPP-PA14	3863.20100702973	2	PA14_12350	PA14_12350
fig|287.6770.peg.1021	W16407	2861.72179620984	2	PA14_12350	PA14_12350
fig|287.6770.peg.1021	W25637	7720.39142377105	2	PA14_12350	PA14_12350
fig|287.6770.peg.1021	W36662	4086.76948464247	2	PA14_12350	PA14_12350
fig|287.6770.peg.1021	W91453	5756.31007591761	2	PA14_12350	PA14_12350
fig|287.6770.peg.1021	X9820	3396.74507865402	2	PA14_12350	PA14_12350
fig|287.6770.peg.1021	F22031	2725.34735904096	3	PA14_12350	PA14_12350
fig|287.6770.peg.1021	F30658	4083.61579615363	3	PA14_12350	PA14_12350
fig|287.6770.peg.1021	F34365	3478.8908129422	3	PA14_12350	PA14_12350
fig|287.6770.peg.1021	M1608	3164.02555302619	3	PA14_12350	PA14_12350
fig|287.6770.peg.1021	M37351	5158.46426330893	3	PA14_12350	PA14_12350
fig|287.6770.peg.1021	UCBPP-PA14	3280.37960535545	3	PA14_12350	PA14_12350
fig|287.6770.peg.1021	W16407	2835.08950038626	3	PA14_12350	PA14_12350
fig|287.6770.peg.1021	W25637	4792.6316414349	3	PA14_12350	PA14_12350
fig|287.6770.peg.1021	W36662	3882.72452204119	3	PA14_12350	PA14_12350
fig|287.6770.peg.1021	W91453	6569.96546888005	3	PA14_12350	PA14_12350
fig|287.6770.peg.1021	X9820	3234.71019394845	3	PA14_12350	PA14_12350
fig|287.6770.peg.1022	F22031	327.398067352624	1	PA14_12360	PA14_12360
fig|287.6770.peg.1022	F30658	901.347368352092	1	PA14_12360	PA14_12360
fig|287.6770.peg.1022	F34365	1222.51226112937	1	PA14_12360	PA14_12360
fig|287.6770.peg.1022	M1608	468.702157766862	1	PA14_12360	PA14_12360
fig|287.6770.peg.1022	M37351	877.404256731472	1	PA14_12360	PA14_12360
fig|287.6770.peg.1022	UCBPP-PA14	665.348174517054	1	PA14_12360	PA14_12360
fig|287.6770.peg.1022	W16407	697.415285439143	1	PA14_12360	PA14_12360
fig|287.6770.peg.1022	W25637	1287.98652309331	1	PA14_12360	PA14_12360
fig|287.6770.peg.1022	W36662	663.886426598073	1	PA14_12360	PA14_12360
fig|287.6770.peg.1022	W91453	1140.28664375716	1	PA14_12360	PA14_12360
fig|287.6770.peg.1022	X9820	393.609935037965	1	PA14_12360	PA14_12360
fig|287.6770.peg.1022	F22031	285.77551729465	2	PA14_12360	PA14_12360
fig|287.6770.peg.1022	F30658	532.951941554666	2	PA14_12360	PA14_12360
fig|287.6770.peg.1022	F34365	598.800119293535	2	PA14_12360	PA14_12360
fig|287.6770.peg.1022	M1608	582.574983174633	2	PA14_12360	PA14_12360
fig|287.6770.peg.1022	M37351	795.076546154845	2	PA14_12360	PA14_12360
fig|287.6770.peg.1022	UCBPP-PA14	629.304418215666	2	PA14_12360	PA14_12360
fig|287.6770.peg.1022	W16407	560.092339319358	2	PA14_12360	PA14_12360
fig|287.6770.peg.1022	W25637	1432.02719106155	2	PA14_12360	PA14_12360
fig|287.6770.peg.1022	W36662	912.705667927415	2	PA14_12360	PA14_12360
fig|287.6770.peg.1022	W91453	1029.99964556394	2	PA14_12360	PA14_12360
fig|287.6770.peg.1022	X9820	387.020694329001	2	PA14_12360	PA14_12360
fig|287.6770.peg.1022	F22031	366.698672351808	3	PA14_12360	PA14_12360
fig|287.6770.peg.1022	F30658	581.318104878811	3	PA14_12360	PA14_12360
fig|287.6770.peg.1022	F34365	775.365994865656	3	PA14_12360	PA14_12360
fig|287.6770.peg.1022	M1608	359.329787867854	3	PA14_12360	PA14_12360
fig|287.6770.peg.1022	M37351	1032.12111868614	3	PA14_12360	PA14_12360
fig|287.6770.peg.1022	UCBPP-PA14	524.679291568722	3	PA14_12360	PA14_12360
fig|287.6770.peg.1022	W16407	740.586293331215	3	PA14_12360	PA14_12360
fig|287.6770.peg.1022	W25637	760.223610844698	3	PA14_12360	PA14_12360
fig|287.6770.peg.1022	W36662	748.239085626475	3	PA14_12360	PA14_12360
fig|287.6770.peg.1022	W91453	1157.00710739781	3	PA14_12360	PA14_12360
fig|287.6770.peg.1022	X9820	447.697950778109	3	PA14_12360	PA14_12360
fig|287.6770.peg.1023	F22031	2014.57350933038	1	PA14_12370	PA14_12370
fig|287.6770.peg.1023	F30658	2346.27298317516	1	PA14_12370	PA14_12370
fig|287.6770.peg.1023	F34365	2691.78605897569	1	PA14_12370	PA14_12370
fig|287.6770.peg.1023	M1608	2420.36495327183	1	PA14_12370	PA14_12370
fig|287.6770.peg.1023	M37351	2791.97891843507	1	PA14_12370	PA14_12370
fig|287.6770.peg.1023	UCBPP-PA14	2055.80633563353	1	PA14_12370	PA14_12370
fig|287.6770.peg.1023	W16407	2589.92670083175	1	PA14_12370	PA14_12370
fig|287.6770.peg.1023	W25637	3174.04878462835	1	PA14_12370	PA14_12370
fig|287.6770.peg.1023	W36662	2196.00188716025	1	PA14_12370	PA14_12370
fig|287.6770.peg.1023	W91453	2928.4469925279	1	PA14_12370	PA14_12370
fig|287.6770.peg.1023	X9820	2192.56703670313	1	PA14_12370	PA14_12370
fig|287.6770.peg.1023	F22031	1981.19373047541	2	PA14_12370	PA14_12370
fig|287.6770.peg.1023	F30658	2379.74627815931	2	PA14_12370	PA14_12370
fig|287.6770.peg.1023	F34365	2422.01242281415	2	PA14_12370	PA14_12370
fig|287.6770.peg.1023	M1608	2694.40929718268	2	PA14_12370	PA14_12370
fig|287.6770.peg.1023	M37351	2450.93844393188	2	PA14_12370	PA14_12370
fig|287.6770.peg.1023	UCBPP-PA14	2096.98794565749	2	PA14_12370	PA14_12370
fig|287.6770.peg.1023	W16407	2556.5152284948	2	PA14_12370	PA14_12370
fig|287.6770.peg.1023	W25637	3350.87255873708	2	PA14_12370	PA14_12370
fig|287.6770.peg.1023	W36662	2245.58985980922	2	PA14_12370	PA14_12370
fig|287.6770.peg.1023	W91453	3005.99187340114	2	PA14_12370	PA14_12370
fig|287.6770.peg.1023	X9820	1681.67367688134	2	PA14_12370	PA14_12370
fig|287.6770.peg.1023	F22031	1985.52609598957	3	PA14_12370	PA14_12370
fig|287.6770.peg.1023	F30658	2234.62132890295	3	PA14_12370	PA14_12370
fig|287.6770.peg.1023	F34365	2650.19276551965	3	PA14_12370	PA14_12370
fig|287.6770.peg.1023	M1608	2026.5850323058	3	PA14_12370	PA14_12370
fig|287.6770.peg.1023	M37351	3494.65075870493	3	PA14_12370	PA14_12370
fig|287.6770.peg.1023	UCBPP-PA14	2122.15384932767	3	PA14_12370	PA14_12370
fig|287.6770.peg.1023	W16407	2889.32962327812	3	PA14_12370	PA14_12370
fig|287.6770.peg.1023	W25637	2905.34335067207	3	PA14_12370	PA14_12370
fig|287.6770.peg.1023	W36662	2096.60541441671	3	PA14_12370	PA14_12370
fig|287.6770.peg.1023	W91453	3078.55635624791	3	PA14_12370	PA14_12370
fig|287.6770.peg.1023	X9820	2161.7151053067	3	PA14_12370	PA14_12370
fig|287.6770.peg.1024	F22031	2078.30062706325	1	hemL	PA14_12390
fig|287.6770.peg.1024	F30658	2203.16533442272	1	hemL	PA14_12390
fig|287.6770.peg.1024	F34365	1846.36713212503	1	hemL	PA14_12390
fig|287.6770.peg.1024	M1608	2320.77927540913	1	hemL	PA14_12390
fig|287.6770.peg.1024	M37351	2184.34373168373	1	hemL	PA14_12390
fig|287.6770.peg.1024	UCBPP-PA14	1949.23110408664	1	hemL	PA14_12390
fig|287.6770.peg.1024	W16407	1770.02233836137	1	hemL	PA14_12390
fig|287.6770.peg.1024	W25637	2999.56219682962	1	hemL	PA14_12390
fig|287.6770.peg.1024	W36662	2550.19573992803	1	hemL	PA14_12390
fig|287.6770.peg.1024	W91453	2944.35460582064	1	hemL	PA14_12390
fig|287.6770.peg.1024	X9820	1776.41142519521	1	hemL	PA14_12390
fig|287.6770.peg.1024	F22031	2059.04923999479	2	hemL	PA14_12390
fig|287.6770.peg.1024	F30658	3257.95839054722	2	hemL	PA14_12390
fig|287.6770.peg.1024	F34365	2581.8910616305	2	hemL	PA14_12390
fig|287.6770.peg.1024	M1608	2257.4780598017	2	hemL	PA14_12390
fig|287.6770.peg.1024	M37351	3059.84004126259	2	hemL	PA14_12390
fig|287.6770.peg.1024	UCBPP-PA14	1530.09388296735	2	hemL	PA14_12390
fig|287.6770.peg.1024	W16407	2424.14965611659	2	hemL	PA14_12390
fig|287.6770.peg.1024	W25637	2890.11277600512	2	hemL	PA14_12390
fig|287.6770.peg.1024	W36662	2640.72463068023	2	hemL	PA14_12390
fig|287.6770.peg.1024	W91453	2992.59944302146	2	hemL	PA14_12390
fig|287.6770.peg.1024	X9820	2874.16891270725	2	hemL	PA14_12390
fig|287.6770.peg.1024	F22031	2015.50438161249	3	hemL	PA14_12390
fig|287.6770.peg.1024	F30658	3259.12254344185	3	hemL	PA14_12390
fig|287.6770.peg.1024	F34365	1992.97777939543	3	hemL	PA14_12390
fig|287.6770.peg.1024	M1608	2037.95069469578	3	hemL	PA14_12390
fig|287.6770.peg.1024	M37351	2569.59614610656	3	hemL	PA14_12390
fig|287.6770.peg.1024	UCBPP-PA14	1692.73333403799	3	hemL	PA14_12390
fig|287.6770.peg.1024	W16407	1677.27149250224	3	hemL	PA14_12390
fig|287.6770.peg.1024	W25637	2880.69769745267	3	hemL	PA14_12390
fig|287.6770.peg.1024	W36662	2645.16779390826	3	hemL	PA14_12390
fig|287.6770.peg.1024	W91453	3184.31801914881	3	hemL	PA14_12390
fig|287.6770.peg.1024	X9820	2673.23776394367	3	hemL	PA14_12390
fig|287.6770.peg.1025	F22031	736.84479878632	1	thiE	PA14_12400
fig|287.6770.peg.1025	F30658	879.419583462605	1	thiE	PA14_12400
fig|287.6770.peg.1025	F34365	757.66218315907	1	thiE	PA14_12400
fig|287.6770.peg.1025	M1608	711.171634302144	1	thiE	PA14_12400
fig|287.6770.peg.1025	M37351	708.471198345861	1	thiE	PA14_12400
fig|287.6770.peg.1025	UCBPP-PA14	639.45138928136	1	thiE	PA14_12400
fig|287.6770.peg.1025	W16407	648.861056706038	1	thiE	PA14_12400
fig|287.6770.peg.1025	W25637	904.575205167141	1	thiE	PA14_12400
fig|287.6770.peg.1025	W36662	778.318286723048	1	thiE	PA14_12400
fig|287.6770.peg.1025	W91453	965.302897536973	1	thiE	PA14_12400
fig|287.6770.peg.1025	X9820	511.974736505228	1	thiE	PA14_12400
fig|287.6770.peg.1025	F22031	653.986279962757	2	thiE	PA14_12400
fig|287.6770.peg.1025	F30658	816.80677999139	2	thiE	PA14_12400
fig|287.6770.peg.1025	F34365	772.581248441742	2	thiE	PA14_12400
fig|287.6770.peg.1025	M1608	741.06964771479	2	thiE	PA14_12400
fig|287.6770.peg.1025	M37351	676.800696313628	2	thiE	PA14_12400
fig|287.6770.peg.1025	UCBPP-PA14	599.139413044998	2	thiE	PA14_12400
fig|287.6770.peg.1025	W16407	693.551842047798	2	thiE	PA14_12400
fig|287.6770.peg.1025	W25637	978.374243024684	2	thiE	PA14_12400
fig|287.6770.peg.1025	W36662	891.372100486022	2	thiE	PA14_12400
fig|287.6770.peg.1025	W91453	977.647417716125	2	thiE	PA14_12400
fig|287.6770.peg.1025	X9820	659.113923590761	2	thiE	PA14_12400
fig|287.6770.peg.1025	F22031	714.12558966031	3	thiE	PA14_12400
fig|287.6770.peg.1025	F30658	860.465907716656	3	thiE	PA14_12400
fig|287.6770.peg.1025	F34365	658.035479240483	3	thiE	PA14_12400
fig|287.6770.peg.1025	M1608	621.614304559718	3	thiE	PA14_12400
fig|287.6770.peg.1025	M37351	620.985735309086	3	thiE	PA14_12400
fig|287.6770.peg.1025	UCBPP-PA14	553.408128859228	3	thiE	PA14_12400
fig|287.6770.peg.1025	W16407	570.56436965095	3	thiE	PA14_12400
fig|287.6770.peg.1025	W25637	926.107815206072	3	thiE	PA14_12400
fig|287.6770.peg.1025	W36662	943.527292725467	3	thiE	PA14_12400
fig|287.6770.peg.1025	W91453	1005.37291600977	3	thiE	PA14_12400
fig|287.6770.peg.1025	X9820	708.546756809983	3	thiE	PA14_12400
fig|287.6770.peg.1026	F22031	1430.67379310295	1	thiD	PA14_12410
fig|287.6770.peg.1026	F30658	2199.70305259806	1	thiD	PA14_12410
fig|287.6770.peg.1026	F34365	1965.40350723144	1	thiD	PA14_12410
fig|287.6770.peg.1026	M1608	2163.82358747334	1	thiD	PA14_12410
fig|287.6770.peg.1026	M37351	1519.08796687837	1	thiD	PA14_12410
fig|287.6770.peg.1026	UCBPP-PA14	1603.60862421026	1	thiD	PA14_12410
fig|287.6770.peg.1026	W16407	1431.24624242811	1	thiD	PA14_12410
fig|287.6770.peg.1026	W25637	2617.29881698107	1	thiD	PA14_12410
fig|287.6770.peg.1026	W36662	1924.45326670495	1	thiD	PA14_12410
fig|287.6770.peg.1026	W91453	2430.24946713241	1	thiD	PA14_12410
fig|287.6770.peg.1026	X9820	1470.16598647832	1	thiD	PA14_12410
fig|287.6770.peg.1026	F22031	1486.58225823467	2	thiD	PA14_12410
fig|287.6770.peg.1026	F30658	2097.05003089988	2	thiD	PA14_12410
fig|287.6770.peg.1026	F34365	1939.39740129399	2	thiD	PA14_12410
fig|287.6770.peg.1026	M1608	1829.11410158506	2	thiD	PA14_12410
fig|287.6770.peg.1026	M37351	1549.6326622715	2	thiD	PA14_12410
fig|287.6770.peg.1026	UCBPP-PA14	1581.06233997986	2	thiD	PA14_12410
fig|287.6770.peg.1026	W16407	1564.32040083336	2	thiD	PA14_12410
fig|287.6770.peg.1026	W25637	2454.22691470599	2	thiD	PA14_12410
fig|287.6770.peg.1026	W36662	2133.35674413928	2	thiD	PA14_12410
fig|287.6770.peg.1026	W91453	2293.75807593671	2	thiD	PA14_12410
fig|287.6770.peg.1026	X9820	1275.00726202803	2	thiD	PA14_12410
fig|287.6770.peg.1026	F22031	1438.42238337125	3	thiD	PA14_12410
fig|287.6770.peg.1026	F30658	1965.54586946648	3	thiD	PA14_12410
fig|287.6770.peg.1026	F34365	1881.39071558407	3	thiD	PA14_12410
fig|287.6770.peg.1026	M1608	1585.94704426347	3	thiD	PA14_12410
fig|287.6770.peg.1026	M37351	1213.06351397447	3	thiD	PA14_12410
fig|287.6770.peg.1026	UCBPP-PA14	1505.23986961574	3	thiD	PA14_12410
fig|287.6770.peg.1026	W16407	1524.98191669047	3	thiD	PA14_12410
fig|287.6770.peg.1026	W25637	2479.73187776774	3	thiD	PA14_12410
fig|287.6770.peg.1026	W36662	1974.82456616958	3	thiD	PA14_12410
fig|287.6770.peg.1026	W91453	2391.74266584326	3	thiD	PA14_12410
fig|287.6770.peg.1026	X9820	1696.44223497325	3	thiD	PA14_12410
fig|287.6770.peg.1027	F22031	1430.67379310295	1	fig|287.6770.peg.1027
fig|287.6770.peg.1027	F30658	2018.5103037744	1	fig|287.6770.peg.1027
fig|287.6770.peg.1027	F34365	1683.88682449803	1	fig|287.6770.peg.1027
fig|287.6770.peg.1027	M1608	1380.12760081466	1	fig|287.6770.peg.1027
fig|287.6770.peg.1027	M37351	2249.82166129055	1	fig|287.6770.peg.1027
fig|287.6770.peg.1027	UCBPP-PA14	4168.38639274531	1	fig|287.6770.peg.1027
fig|287.6770.peg.1027	W16407	1704.91553165107	1	fig|287.6770.peg.1027
fig|287.6770.peg.1027	W25637	1523.31382900609	1	fig|287.6770.peg.1027
fig|287.6770.peg.1027	W36662	652.079964839147	1	fig|287.6770.peg.1027
fig|287.6770.peg.1027	W91453	1430.96212301548	1	fig|287.6770.peg.1027
fig|287.6770.peg.1027	X9820	1565.98511147563	1	fig|287.6770.peg.1027
fig|287.6770.peg.1027	F22031	1352.85397129551	2	fig|287.6770.peg.1027
fig|287.6770.peg.1027	F30658	1853.7458836684	2	fig|287.6770.peg.1027
fig|287.6770.peg.1027	F34365	1648.4381393487	2	fig|287.6770.peg.1027
fig|287.6770.peg.1027	M1608	1600.65332386952	2	fig|287.6770.peg.1027
fig|287.6770.peg.1027	M37351	1810.27759062529	2	fig|287.6770.peg.1027
fig|287.6770.peg.1027	UCBPP-PA14	4172.13226688106	2	fig|287.6770.peg.1027
fig|287.6770.peg.1027	W16407	1632.14408254782	2	fig|287.6770.peg.1027
fig|287.6770.peg.1027	W25637	1542.18312883552	2	fig|287.6770.peg.1027
fig|287.6770.peg.1027	W36662	590.847063485532	2	fig|287.6770.peg.1027
fig|287.6770.peg.1027	W91453	1524.30207594096	2	fig|287.6770.peg.1027
fig|287.6770.peg.1027	X9820	1267.1489738183	2	fig|287.6770.peg.1027
fig|287.6770.peg.1027	F22031	1783.17266803485	3	fig|287.6770.peg.1027
fig|287.6770.peg.1027	F30658	1990.00727486979	3	fig|287.6770.peg.1027
fig|287.6770.peg.1027	F34365	1813.2897869345	3	fig|287.6770.peg.1027
fig|287.6770.peg.1027	M1608	1375.24514918767	3	fig|287.6770.peg.1027
fig|287.6770.peg.1027	M37351	2148.82477718161	3	fig|287.6770.peg.1027
fig|287.6770.peg.1027	UCBPP-PA14	5108.44088347241	3	fig|287.6770.peg.1027
fig|287.6770.peg.1027	W16407	1949.51518624794	3	fig|287.6770.peg.1027
fig|287.6770.peg.1027	W25637	1591.54045212999	3	fig|287.6770.peg.1027
fig|287.6770.peg.1027	W36662	613.292740271553	3	fig|287.6770.peg.1027
fig|287.6770.peg.1027	W91453	1434.79075212547	3	fig|287.6770.peg.1027
fig|287.6770.peg.1027	X9820	1542.89293780555	3	fig|287.6770.peg.1027
fig|287.6770.peg.1028	F22031	784.640137085973	1	fig|287.6770.peg.1028
fig|287.6770.peg.1028	F30658	862.108174339325	1	fig|287.6770.peg.1028
fig|287.6770.peg.1028	F34365	843.681169549836	1	fig|287.6770.peg.1028
fig|287.6770.peg.1028	M1608	737.150506788067	1	fig|287.6770.peg.1028
fig|287.6770.peg.1028	M37351	1291.22477184661	1	fig|287.6770.peg.1028
fig|287.6770.peg.1028	UCBPP-PA14	751.006771835117	1	fig|287.6770.peg.1028
fig|287.6770.peg.1028	W16407	911.495293944196	1	fig|287.6770.peg.1028
fig|287.6770.peg.1028	W25637	724.348926980286	1	fig|287.6770.peg.1028
fig|287.6770.peg.1028	W36662	239.761992642806	1	fig|287.6770.peg.1028
fig|287.6770.peg.1028	W91453	661.612098311858	1	fig|287.6770.peg.1028
fig|287.6770.peg.1028	X9820	808.826143359636	1	fig|287.6770.peg.1028
fig|287.6770.peg.1028	F22031	628.339759179904	2	fig|287.6770.peg.1028
fig|287.6770.peg.1028	F30658	940.776035961714	2	fig|287.6770.peg.1028
fig|287.6770.peg.1028	F34365	1091.34549105074	2	fig|287.6770.peg.1028
fig|287.6770.peg.1028	M1608	652.541096350018	2	fig|287.6770.peg.1028
fig|287.6770.peg.1028	M37351	1469.6869489529	2	fig|287.6770.peg.1028
fig|287.6770.peg.1028	UCBPP-PA14	861.262906252185	2	fig|287.6770.peg.1028
fig|287.6770.peg.1028	W16407	1004.228061514	2	fig|287.6770.peg.1028
fig|287.6770.peg.1028	W25637	683.44060317826	2	fig|287.6770.peg.1028
fig|287.6770.peg.1028	W36662	217.973406466405	2	fig|287.6770.peg.1028
fig|287.6770.peg.1028	W91453	684.2314430342	2	fig|287.6770.peg.1028
fig|287.6770.peg.1028	X9820	817.261973811495	2	fig|287.6770.peg.1028
fig|287.6770.peg.1028	F22031	852.239834137341	3	fig|287.6770.peg.1028
fig|287.6770.peg.1028	F30658	1129.54136715314	3	fig|287.6770.peg.1028
fig|287.6770.peg.1028	F34365	1160.17726639157	3	fig|287.6770.peg.1028
fig|287.6770.peg.1028	M1608	785.104986630979	3	fig|287.6770.peg.1028
fig|287.6770.peg.1028	M37351	1027.83845844263	3	fig|287.6770.peg.1028
fig|287.6770.peg.1028	UCBPP-PA14	1180.15039501264	3	fig|287.6770.peg.1028
fig|287.6770.peg.1028	W16407	1244.39358865372	3	fig|287.6770.peg.1028
fig|287.6770.peg.1028	W25637	814.254465979546	3	fig|287.6770.peg.1028
fig|287.6770.peg.1028	W36662	254.532944084079	3	fig|287.6770.peg.1028
fig|287.6770.peg.1028	W91453	694.459111819168	3	fig|287.6770.peg.1028
fig|287.6770.peg.1028	X9820	882.445960831232	3	fig|287.6770.peg.1028
fig|287.6770.peg.1029	F22031	613.373508178883	1	PA14_12440	PA14_12440
fig|287.6770.peg.1029	F30658	380.851000712152	1	PA14_12440	PA14_12440
fig|287.6770.peg.1029	F34365	416.192873547242	1	PA14_12440	PA14_12440
fig|287.6770.peg.1029	M1608	532.566885961423	1	PA14_12440	PA14_12440
fig|287.6770.peg.1029	M37351	843.355733335923	1	PA14_12440	PA14_12440
fig|287.6770.peg.1029	UCBPP-PA14	265.940063766547	1	PA14_12440	PA14_12440
fig|287.6770.peg.1029	W16407	624.583942339486	1	PA14_12440	PA14_12440
fig|287.6770.peg.1029	W25637	320.274723656894	1	PA14_12440	PA14_12440
fig|287.6770.peg.1029	W36662	367.81669325885	1	PA14_12440	PA14_12440
fig|287.6770.peg.1029	W91453	322.490705843813	1	PA14_12440	PA14_12440
fig|287.6770.peg.1029	X9820	777.825838213448	1	PA14_12440	PA14_12440
fig|287.6770.peg.1029	F22031	577.962664785013	2	PA14_12440	PA14_12440
fig|287.6770.peg.1029	F30658	295.440750209652	2	PA14_12440	PA14_12440
fig|287.6770.peg.1029	F34365	398.207044505319	2	PA14_12440	PA14_12440
fig|287.6770.peg.1029	M1608	482.623392924083	2	PA14_12440	PA14_12440
fig|287.6770.peg.1029	M37351	357.017843039228	2	PA14_12440	PA14_12440
fig|287.6770.peg.1029	UCBPP-PA14	373.421960561032	2	PA14_12440	PA14_12440
fig|287.6770.peg.1029	W16407	497.73830935607	2	PA14_12440	PA14_12440
fig|287.6770.peg.1029	W25637	296.118112295606	2	PA14_12440	PA14_12440
fig|287.6770.peg.1029	W36662	293.104665716528	2	PA14_12440	PA14_12440
fig|287.6770.peg.1029	W91453	332.375772150065	2	PA14_12440	PA14_12440
fig|287.6770.peg.1029	X9820	392.914410486295	2	PA14_12440	PA14_12440
fig|287.6770.peg.1029	F22031	617.766814443776	3	PA14_12440	PA14_12440
fig|287.6770.peg.1029	F30658	267.636553236284	3	PA14_12440	PA14_12440
fig|287.6770.peg.1029	F34365	586.652578125867	3	PA14_12440	PA14_12440
fig|287.6770.peg.1029	M1608	617.242895948186	3	PA14_12440	PA14_12440
fig|287.6770.peg.1029	M37351	416.488708681439	3	PA14_12440	PA14_12440
fig|287.6770.peg.1029	UCBPP-PA14	348.52615765588	3	PA14_12440	PA14_12440
fig|287.6770.peg.1029	W16407	713.466231885283	3	PA14_12440	PA14_12440
fig|287.6770.peg.1029	W25637	346.934964550074	3	PA14_12440	PA14_12440
fig|287.6770.peg.1029	W36662	302.806433479336	3	PA14_12440	PA14_12440
fig|287.6770.peg.1029	W91453	242.105011459893	3	PA14_12440	PA14_12440
fig|287.6770.peg.1029	X9820	695.596816084997	3	PA14_12440	PA14_12440
fig|287.6770.peg.103	F22031	2538.72905268325	1	PA14_01160	PA14_01160
fig|287.6770.peg.103	F30658	1598.42010904949	1	PA14_01160	PA14_01160
fig|287.6770.peg.103	F34365	3062.79724270152	1	PA14_01160	PA14_01160
fig|287.6770.peg.103	M1608	2381.39664454295	1	PA14_01160	PA14_01160
fig|287.6770.peg.103	M37351	2384.70619628061	1	PA14_01160	PA14_01160
fig|287.6770.peg.103	UCBPP-PA14	1564.76344635672	1	PA14_01160	PA14_01160
fig|287.6770.peg.103	W16407	2215.83843854715	1	PA14_01160	PA14_01160
fig|287.6770.peg.103	W25637	2407.22614877601	1	PA14_01160	PA14_01160
fig|287.6770.peg.103	W36662	1221.51469736581	1	PA14_01160	PA14_01160
fig|287.6770.peg.103	W91453	1855.40616859916	1	PA14_01160	PA14_01160
fig|287.6770.peg.103	X9820	2867.05852442928	1	PA14_01160	PA14_01160
fig|287.6770.peg.103	F22031	3853.38974762369	2	PA14_01160	PA14_01160
fig|287.6770.peg.103	F30658	1311.52521269539	2	PA14_01160	PA14_01160
fig|287.6770.peg.103	F34365	5300.82095653216	2	PA14_01160	PA14_01160
fig|287.6770.peg.103	M1608	2543.05403194613	2	PA14_01160	PA14_01160
fig|287.6770.peg.103	M37351	2258.19261456101	2	PA14_01160	PA14_01160
fig|287.6770.peg.103	UCBPP-PA14	1889.99359983118	2	PA14_01160	PA14_01160
fig|287.6770.peg.103	W16407	3969.87324099599	2	PA14_01160	PA14_01160
fig|287.6770.peg.103	W25637	2422.24615857806	2	PA14_01160	PA14_01160
fig|287.6770.peg.103	W36662	910.850575106424	2	PA14_01160	PA14_01160
fig|287.6770.peg.103	W91453	1933.37994935642	2	PA14_01160	PA14_01160
fig|287.6770.peg.103	X9820	3468.45195856777	2	PA14_01160	PA14_01160
fig|287.6770.peg.103	F22031	2421.2818905799	3	PA14_01160	PA14_01160
fig|287.6770.peg.103	F30658	938.16684252719	3	PA14_01160	PA14_01160
fig|287.6770.peg.103	F34365	3185.15427732114	3	PA14_01160	PA14_01160
fig|287.6770.peg.103	M1608	3566.19514528704	3	PA14_01160	PA14_01160
fig|287.6770.peg.103	M37351	2784.79982334299	3	PA14_01160	PA14_01160
fig|287.6770.peg.103	UCBPP-PA14	2558.37856292299	3	PA14_01160	PA14_01160
fig|287.6770.peg.103	W16407	3264.83816637564	3	PA14_01160	PA14_01160
fig|287.6770.peg.103	W25637	2900.60380197603	3	PA14_01160	PA14_01160
fig|287.6770.peg.103	W36662	1029.10302392615	3	PA14_01160	PA14_01160
fig|287.6770.peg.103	W91453	1943.21127619125	3	PA14_01160	PA14_01160
fig|287.6770.peg.103	X9820	3102.43579940037	3	PA14_01160	PA14_01160
fig|287.6770.peg.1030	F22031	1000.51574840607	1	PA14_12450	PA14_12450
fig|287.6770.peg.1030	F30658	972.901192728315	1	PA14_12450	PA14_12450
fig|287.6770.peg.1030	F34365	783.728542671423	1	PA14_12450	PA14_12450
fig|287.6770.peg.1030	M1608	1427.75553370552	1	PA14_12450	PA14_12450
fig|287.6770.peg.1030	M37351	3343.30308572455	1	PA14_12450	PA14_12450
fig|287.6770.peg.1030	UCBPP-PA14	708.177473176086	1	PA14_12450	PA14_12450
fig|287.6770.peg.1030	W16407	2521.50937852602	1	PA14_12450	PA14_12450
fig|287.6770.peg.1030	W25637	612.998933450829	1	PA14_12450	PA14_12450
fig|287.6770.peg.1030	W36662	1338.671125589	1	PA14_12450	PA14_12450
fig|287.6770.peg.1030	W91453	633.412238383812	1	PA14_12450	PA14_12450
fig|287.6770.peg.1030	X9820	1660.86483328669	1	PA14_12450	PA14_12450
fig|287.6770.peg.1030	F22031	909.535540620473	2	PA14_12450	PA14_12450
fig|287.6770.peg.1030	F30658	827.234100587024	2	PA14_12450	PA14_12450
fig|287.6770.peg.1030	F34365	932.459887258092	2	PA14_12450	PA14_12450
fig|287.6770.peg.1030	M1608	1395.03862392553	2	PA14_12450	PA14_12450
fig|287.6770.peg.1030	M37351	1226.56436872373	2	PA14_12450	PA14_12450
fig|287.6770.peg.1030	UCBPP-PA14	1091.14104910452	2	PA14_12450	PA14_12450
fig|287.6770.peg.1030	W16407	1659.49234130364	2	PA14_12450	PA14_12450
fig|287.6770.peg.1030	W25637	638.430650109328	2	PA14_12450	PA14_12450
fig|287.6770.peg.1030	W36662	1047.19989744924	2	PA14_12450	PA14_12450
fig|287.6770.peg.1030	W91453	801.110835438618	2	PA14_12450	PA14_12450
fig|287.6770.peg.1030	X9820	1122.75292796459	2	PA14_12450	PA14_12450
fig|287.6770.peg.1030	F22031	885.965405463128	3	PA14_12450	PA14_12450
fig|287.6770.peg.1030	F30658	920.899968124849	3	PA14_12450	PA14_12450
fig|287.6770.peg.1030	F34365	851.671854677832	3	PA14_12450	PA14_12450
fig|287.6770.peg.1030	M1608	1934.78545146365	3	PA14_12450	PA14_12450
fig|287.6770.peg.1030	M37351	1299.78738390557	3	PA14_12450	PA14_12450
fig|287.6770.peg.1030	UCBPP-PA14	808.187554303982	3	PA14_12450	PA14_12450
fig|287.6770.peg.1030	W16407	1483.25874523519	3	PA14_12450	PA14_12450
fig|287.6770.peg.1030	W25637	771.598527715192	3	PA14_12450	PA14_12450
fig|287.6770.peg.1030	W36662	1100.41613326005	3	PA14_12450	PA14_12450
fig|287.6770.peg.1030	W91453	722.492323672419	3	PA14_12450	PA14_12450
fig|287.6770.peg.1030	X9820	1060.04514791676	3	PA14_12450	PA14_12450
fig|287.6770.peg.1031	F22031	177.639340680378	1	PA14_12470	PA14_12470
fig|287.6770.peg.1031	F30658	138.491272986237	1	PA14_12470	PA14_12470
fig|287.6770.peg.1031	F34365	156.39815707412	1	PA14_12470	PA14_12470
fig|287.6770.peg.1031	M1608	194.841543644423	1	PA14_12470	PA14_12470
fig|287.6770.peg.1031	M37351	374.533757351046	1	PA14_12470	PA14_12470
fig|287.6770.peg.1031	UCBPP-PA14	140.44025839357	1	PA14_12470	PA14_12470
fig|287.6770.peg.1031	W16407	305.670939978865	1	PA14_12470	PA14_12470
fig|287.6770.peg.1031	W25637	84.9474177441223	1	PA14_12470	PA14_12470
fig|287.6770.peg.1031	W36662	207.975364830313	1	PA14_12470	PA14_12470
fig|287.6770.peg.1031	W91453	101.230266408372	1	PA14_12470	PA14_12470
fig|287.6770.peg.1031	X9820	213.244523278325	1	PA14_12470	PA14_12470
fig|287.6770.peg.1031	F22031	128.232603914266	2	PA14_12470	PA14_12470
fig|287.6770.peg.1031	F30658	105.43179713364	2	PA14_12470	PA14_12470
fig|287.6770.peg.1031	F34365	123.136342939301	2	PA14_12470	PA14_12470
fig|287.6770.peg.1031	M1608	168.489823565212	2	PA14_12470	PA14_12470
fig|287.6770.peg.1031	M37351	140.178784996997	2	PA14_12470	PA14_12470
fig|287.6770.peg.1031	UCBPP-PA14	140.423299932421	2	PA14_12470	PA14_12470
fig|287.6770.peg.1031	W16407	141.117015180073	2	PA14_12470	PA14_12470
fig|287.6770.peg.1031	W25637	78.1751816460401	2	PA14_12470	PA14_12470
fig|287.6770.peg.1031	W36662	162.320621836685	2	PA14_12470	PA14_12470
fig|287.6770.peg.1031	W91453	131.489316454971	2	PA14_12470	PA14_12470
fig|287.6770.peg.1031	X9820	146.360617906145	2	PA14_12470	PA14_12470
fig|287.6770.peg.1031	F22031	147.750121998685	3	PA14_12470	PA14_12470
fig|287.6770.peg.1031	F30658	129.501558017557	3	PA14_12470	PA14_12470
fig|287.6770.peg.1031	F34365	172.30355441459	3	PA14_12470	PA14_12470
fig|287.6770.peg.1031	M1608	271.027333914926	3	PA14_12470	PA14_12470
fig|287.6770.peg.1031	M37351	198.073036262381	3	PA14_12470	PA14_12470
fig|287.6770.peg.1031	UCBPP-PA14	154.984516961942	3	PA14_12470	PA14_12470
fig|287.6770.peg.1031	W16407	300.406834478014	3	PA14_12470	PA14_12470
fig|287.6770.peg.1031	W25637	109.957529748111	3	PA14_12470	PA14_12470
fig|287.6770.peg.1031	W36662	239.173197458316	3	PA14_12470	PA14_12470
fig|287.6770.peg.1031	W91453	110.858610510583	3	PA14_12470	PA14_12470
fig|287.6770.peg.1031	X9820	173.899204021249	3	PA14_12470	PA14_12470
fig|287.6770.peg.1032	F22031	1968.37134897405	1	PA14_12490	PA14_12490
fig|287.6770.peg.1032	F30658	2277.02734668205	1	PA14_12490	PA14_12490
fig|287.6770.peg.1032	F34365	1265.95619364996	1	PA14_12490	PA14_12490
fig|287.6770.peg.1032	M1608	1980.88902705163	1	PA14_12490	PA14_12490
fig|287.6770.peg.1032	M37351	1880.52613830805	1	PA14_12490	PA14_12490
fig|287.6770.peg.1032	UCBPP-PA14	1791.85833226973	1	PA14_12490	PA14_12490
fig|287.6770.peg.1032	W16407	1597.87552739854	1	PA14_12490	PA14_12490
fig|287.6770.peg.1032	W25637	1471.65661551304	1	PA14_12490	PA14_12490
fig|287.6770.peg.1032	W36662	1645.63913132108	1	PA14_12490	PA14_12490
fig|287.6770.peg.1032	W91453	1548.1000027166	1	PA14_12490	PA14_12490
fig|287.6770.peg.1032	X9820	1890.07921073123	1	PA14_12490	PA14_12490
fig|287.6770.peg.1032	F22031	1863.03654544012	2	PA14_12490	PA14_12490
fig|287.6770.peg.1032	F30658	2446.94456644229	2	PA14_12490	PA14_12490
fig|287.6770.peg.1032	F34365	1448.83809958419	2	PA14_12490	PA14_12490
fig|287.6770.peg.1032	M1608	1823.40258214217	2	PA14_12490	PA14_12490
fig|287.6770.peg.1032	M37351	1742.37849164237	2	PA14_12490	PA14_12490
fig|287.6770.peg.1032	UCBPP-PA14	1669.47701030768	2	PA14_12490	PA14_12490
fig|287.6770.peg.1032	W16407	1682.46487865854	2	PA14_12490	PA14_12490
fig|287.6770.peg.1032	W25637	1546.92101863225	2	PA14_12490	PA14_12490
fig|287.6770.peg.1032	W36662	1561.06060886366	2	PA14_12490	PA14_12490
fig|287.6770.peg.1032	W91453	1776.32326581298	2	PA14_12490	PA14_12490
fig|287.6770.peg.1032	X9820	1871.25487994098	2	PA14_12490	PA14_12490
fig|287.6770.peg.1032	F22031	1735.52860695557	3	PA14_12490	PA14_12490
fig|287.6770.peg.1032	F30658	2372.75632412168	3	PA14_12490	PA14_12490
fig|287.6770.peg.1032	F34365	1344.78821755006	3	PA14_12490	PA14_12490
fig|287.6770.peg.1032	M1608	2299.36092966534	3	PA14_12490	PA14_12490
fig|287.6770.peg.1032	M37351	1627.41089253416	3	PA14_12490	PA14_12490
fig|287.6770.peg.1032	UCBPP-PA14	1605.03477809855	3	PA14_12490	PA14_12490
fig|287.6770.peg.1032	W16407	1538.54194741344	3	PA14_12490	PA14_12490
fig|287.6770.peg.1032	W25637	2018.09983477352	3	PA14_12490	PA14_12490
fig|287.6770.peg.1032	W36662	1600.70502335634	3	PA14_12490	PA14_12490
fig|287.6770.peg.1032	W91453	1790.30284790079	3	PA14_12490	PA14_12490
fig|287.6770.peg.1032	X9820	2023.8907361622	3	PA14_12490	PA14_12490
fig|287.6770.peg.1033	F22031	417.412621150305	1	fig|287.6770.peg.1033
fig|287.6770.peg.1033	F30658	469.716234211654	1	fig|287.6770.peg.1033
fig|287.6770.peg.1033	F34365	893.207252623307	1	fig|287.6770.peg.1033
fig|287.6770.peg.1033	M1608	465.454798706121	1	fig|287.6770.peg.1033
fig|287.6770.peg.1033	M37351	307.746269152084	1	fig|287.6770.peg.1033
fig|287.6770.peg.1033	UCBPP-PA14	377.495446320304	1	fig|287.6770.peg.1033
fig|287.6770.peg.1033	W16407	677.552191866509	1	fig|287.6770.peg.1033
fig|287.6770.peg.1033	W25637	792.07727356006	1	fig|287.6770.peg.1033
fig|287.6770.peg.1033	W36662	652.988154205218	1	fig|287.6770.peg.1033
fig|287.6770.peg.1033	W91453	736.08865145516	1	fig|287.6770.peg.1033
fig|287.6770.peg.1033	X9820	721.46164703856	1	fig|287.6770.peg.1033
fig|287.6770.peg.1033	F22031	285.77551729465	2	fig|287.6770.peg.1033
fig|287.6770.peg.1033	F30658	408.982685584341	2	fig|287.6770.peg.1033
fig|287.6770.peg.1033	F34365	674.270781095042	2	fig|287.6770.peg.1033
fig|287.6770.peg.1033	M1608	525.459788745747	2	fig|287.6770.peg.1033
fig|287.6770.peg.1033	M37351	301.165358391987	2	fig|287.6770.peg.1033
fig|287.6770.peg.1033	UCBPP-PA14	390.064722034504	2	fig|287.6770.peg.1033
fig|287.6770.peg.1033	W16407	674.955026093835	2	fig|287.6770.peg.1033
fig|287.6770.peg.1033	W25637	760.431312375117	2	fig|287.6770.peg.1033
fig|287.6770.peg.1033	W36662	757.805417374693	2	fig|287.6770.peg.1033
fig|287.6770.peg.1033	W91453	726.843721514977	2	fig|287.6770.peg.1033
fig|287.6770.peg.1033	X9820	902.720858092264	2	fig|287.6770.peg.1033
fig|287.6770.peg.1033	F22031	346.35626425054	3	fig|287.6770.peg.1033
fig|287.6770.peg.1033	F30658	410.088267055597	3	fig|287.6770.peg.1033
fig|287.6770.peg.1033	F34365	679.368300263242	3	fig|287.6770.peg.1033
fig|287.6770.peg.1033	M1608	616.36861422588	3	fig|287.6770.peg.1033
fig|287.6770.peg.1033	M37351	337.259494176487	3	fig|287.6770.peg.1033
fig|287.6770.peg.1033	UCBPP-PA14	313.749144093688	3	fig|287.6770.peg.1033
fig|287.6770.peg.1033	W16407	696.776963303171	3	fig|287.6770.peg.1033
fig|287.6770.peg.1033	W25637	655.005629792626	3	fig|287.6770.peg.1033
fig|287.6770.peg.1033	W36662	757.016083698339	3	fig|287.6770.peg.1033
fig|287.6770.peg.1033	W91453	756.896720037772	3	fig|287.6770.peg.1033
fig|287.6770.peg.1033	X9820	831.571193697356	3	fig|287.6770.peg.1033
fig|287.6770.peg.1034	F22031	777.470836341025	1	PA14_12530	PA14_12530
fig|287.6770.peg.1034	F30658	947.511126014171	1	PA14_12530	PA14_12530
fig|287.6770.peg.1034	F34365	624.723749646068	1	PA14_12530	PA14_12530
fig|287.6770.peg.1034	M1608	969.877906141127	1	PA14_12530	PA14_12530
fig|287.6770.peg.1034	M37351	667.874881989628	1	PA14_12530	PA14_12530
fig|287.6770.peg.1034	UCBPP-PA14	618.53475505253	1	PA14_12530	PA14_12530
fig|287.6770.peg.1034	W16407	727.209925798094	1	PA14_12530	PA14_12530
fig|287.6770.peg.1034	W25637	951.640666349695	1	PA14_12530	PA14_12530
fig|287.6770.peg.1034	W36662	709.295894901635	1	PA14_12530	PA14_12530
fig|287.6770.peg.1034	W91453	1131.6097637793	1	PA14_12530	PA14_12530
fig|287.6770.peg.1034	X9820	890.554220563223	1	PA14_12530	PA14_12530
fig|287.6770.peg.1034	F22031	640.247072400514	2	PA14_12530	PA14_12530
fig|287.6770.peg.1034	F30658	711.374982857749	2	PA14_12530	PA14_12530
fig|287.6770.peg.1034	F34365	605.751364459463	2	PA14_12530	PA14_12530
fig|287.6770.peg.1034	M1608	868.150955319061	2	PA14_12530	PA14_12530
fig|287.6770.peg.1034	M37351	509.243242371905	2	PA14_12530	PA14_12530
fig|287.6770.peg.1034	UCBPP-PA14	606.420621189642	2	PA14_12530	PA14_12530
fig|287.6770.peg.1034	W16407	650.888558388707	2	PA14_12530	PA14_12530
fig|287.6770.peg.1034	W25637	921.519565463927	2	PA14_12530	PA14_12530
fig|287.6770.peg.1034	W36662	621.456095031878	2	PA14_12530	PA14_12530
fig|287.6770.peg.1034	W91453	1020.2596961969	2	PA14_12530	PA14_12530
fig|287.6770.peg.1034	X9820	798.598539313396	2	PA14_12530	PA14_12530
fig|287.6770.peg.1034	F22031	684.147304037388	3	PA14_12530	PA14_12530
fig|287.6770.peg.1034	F30658	775.570441905147	3	PA14_12530	PA14_12530
fig|287.6770.peg.1034	F34365	521.833621941331	3	PA14_12530	PA14_12530
fig|287.6770.peg.1034	M1608	1207.38305850488	3	PA14_12530	PA14_12530
fig|287.6770.peg.1034	M37351	481.799277394981	3	PA14_12530	PA14_12530
fig|287.6770.peg.1034	UCBPP-PA14	571.552657674285	3	PA14_12530	PA14_12530
fig|287.6770.peg.1034	W16407	607.07214467432	3	PA14_12530	PA14_12530
fig|287.6770.peg.1034	W25637	1055.97144947755	3	PA14_12530	PA14_12530
fig|287.6770.peg.1034	W36662	681.314475328506	3	PA14_12530	PA14_12530
fig|287.6770.peg.1034	W91453	1079.27865635016	3	PA14_12530	PA14_12530
fig|287.6770.peg.1034	X9820	754.796545113507	3	PA14_12530	PA14_12530
fig|287.6770.peg.1035	F22031	520.96918746622	1	PA14_12540	PA14_12540
fig|287.6770.peg.1035	F30658	395.854221952327	1	PA14_12540	PA14_12540
fig|287.6770.peg.1035	F34365	545.655792458596	1	PA14_12540	PA14_12540
fig|287.6770.peg.1035	M1608	540.14405710315	1	PA14_12540	PA14_12540
fig|287.6770.peg.1035	M37351	415.130073707279	1	PA14_12540	PA14_12540
fig|287.6770.peg.1035	UCBPP-PA14	531.880127533094	1	PA14_12540	PA14_12540
fig|287.6770.peg.1035	W16407	573.822703209421	1	PA14_12540	PA14_12540
fig|287.6770.peg.1035	W25637	711.72160812643	1	PA14_12540	PA14_12540
fig|287.6770.peg.1035	W36662	712.928652365919	1	PA14_12540	PA14_12540
fig|287.6770.peg.1035	W91453	717.288744836463	1	PA14_12540	PA14_12540
fig|287.6770.peg.1035	X9820	491.30786640777	1	PA14_12540	PA14_12540
fig|287.6770.peg.1035	F22031	457.057638237277	2	PA14_12540	PA14_12540
fig|287.6770.peg.1035	F30658	390.445226747657	2	PA14_12540	PA14_12540
fig|287.6770.peg.1035	F34365	576.953348772046	2	PA14_12540	PA14_12540
fig|287.6770.peg.1035	M1608	482.623392924083	2	PA14_12540	PA14_12540
fig|287.6770.peg.1035	M37351	600.140423268395	2	PA14_12540	PA14_12540
fig|287.6770.peg.1035	UCBPP-PA14	500.323016796257	2	PA14_12540	PA14_12540
fig|287.6770.peg.1035	W16407	545.871244766327	2	PA14_12540	PA14_12540
fig|287.6770.peg.1035	W25637	683.44060317826	2	PA14_12540	PA14_12540
fig|287.6770.peg.1035	W36662	793.979727384012	2	PA14_12540	PA14_12540
fig|287.6770.peg.1035	W91453	658.664075945733	2	PA14_12540	PA14_12540
fig|287.6770.peg.1035	X9820	681.706502193723	2	PA14_12540	PA14_12540
fig|287.6770.peg.1035	F22031	519.26673311132	3	PA14_12540	PA14_12540
fig|287.6770.peg.1035	F30658	464.76670266301	3	PA14_12540	PA14_12540
fig|287.6770.peg.1035	F34365	511.167211429951	3	PA14_12540	PA14_12540
fig|287.6770.peg.1035	M1608	310.370011418706	3	PA14_12540	PA14_12540
fig|287.6770.peg.1035	M37351	448.608660507771	3	PA14_12540	PA14_12540
fig|287.6770.peg.1035	UCBPP-PA14	499.730564448019	3	PA14_12540	PA14_12540
fig|287.6770.peg.1035	W16407	495.462661031447	3	PA14_12540	PA14_12540
fig|287.6770.peg.1035	W25637	591.4956772657	3	PA14_12540	PA14_12540
fig|287.6770.peg.1035	W36662	715.325342856982	3	PA14_12540	PA14_12540
fig|287.6770.peg.1035	W91453	629.473029795723	3	PA14_12540	PA14_12540
fig|287.6770.peg.1035	X9820	584.59732415654	3	PA14_12540	PA14_12540
fig|287.6770.peg.1036	F22031	426.971688810235	1	PA14_12550	PA14_12550
fig|287.6770.peg.1036	F30658	152.340400284861	1	PA14_12550	PA14_12550
fig|287.6770.peg.1036	F34365	424.881660051359	1	PA14_12550	PA14_12550
fig|287.6770.peg.1036	M1608	280.35533224392	1	PA14_12550	PA14_12550
fig|287.6770.peg.1036	M37351	216.077167702527	1	PA14_12550	PA14_12550
fig|287.6770.peg.1036	UCBPP-PA14	340.64232886951	1	PA14_12550	PA14_12550
fig|287.6770.peg.1036	W16407	280.290320413833	1	PA14_12550	PA14_12550
fig|287.6770.peg.1036	W25637	910.314895555257	1	PA14_12550	PA14_12550
fig|287.6770.peg.1036	W36662	552.179134571311	1	PA14_12550	PA14_12550
fig|287.6770.peg.1036	W91453	822.134377902276	1	PA14_12550	PA14_12550
fig|287.6770.peg.1036	X9820	234.850796562031	1	PA14_12550	PA14_12550
fig|287.6770.peg.1036	F22031	410.344332525651	2	PA14_12550	PA14_12550
fig|287.6770.peg.1036	F30658	129.762211856788	2	PA14_12550	PA14_12550
fig|287.6770.peg.1036	F34365	350.541363367526	2	PA14_12550	PA14_12550
fig|287.6770.peg.1036	M1608	289.859611726594	2	PA14_12550	PA14_12550
fig|287.6770.peg.1036	M37351	271.596395931683	2	PA14_12550	PA14_12550
fig|287.6770.peg.1036	UCBPP-PA14	281.886772456935	2	PA14_12550	PA14_12550
fig|287.6770.peg.1036	W16407	309.582289115973	2	PA14_12550	PA14_12550
fig|287.6770.peg.1036	W25637	946.393486896758	2	PA14_12550	PA14_12550
fig|287.6770.peg.1036	W36662	695.659807871505	2	PA14_12550	PA14_12550
fig|287.6770.peg.1036	W91453	686.666430375958	2	PA14_12550	PA14_12550
fig|287.6770.peg.1036	X9820	309.420098257958	2	PA14_12550	PA14_12550
fig|287.6770.peg.1036	F22031	450.209610872804	3	PA14_12550	PA14_12550
fig|287.6770.peg.1036	F30658	136.696089018532	3	PA14_12550	PA14_12550
fig|287.6770.peg.1036	F34365	324.915274038942	3	PA14_12550	PA14_12550
fig|287.6770.peg.1036	M1608	228.187529521922	3	PA14_12550	PA14_12550
fig|287.6770.peg.1036	M37351	326.552843567709	3	PA14_12550	PA14_12550
fig|287.6770.peg.1036	UCBPP-PA14	274.435998327732	3	PA14_12550	PA14_12550
fig|287.6770.peg.1036	W16407	246.16671158615	3	PA14_12550	PA14_12550
fig|287.6770.peg.1036	W25637	661.640997967081	3	PA14_12550	PA14_12550
fig|287.6770.peg.1036	W36662	718.616717133931	3	PA14_12550	PA14_12550
fig|287.6770.peg.1036	W91453	816.785854451535	3	PA14_12550	PA14_12550
fig|287.6770.peg.1036	X9820	292.29866207827	3	PA14_12550	PA14_12550
fig|287.6770.peg.1037	F22031	1782.76611857706	1	PA14_12560	PA14_12560
fig|287.6770.peg.1037	F30658	1332.97850249253	1	PA14_12560	PA14_12560
fig|287.6770.peg.1037	F34365	1517.93100226938	1	PA14_12560	PA14_12560
fig|287.6770.peg.1037	M1608	956.888469898166	1	PA14_12560	PA14_12560
fig|287.6770.peg.1037	M37351	839.427057559513	1	PA14_12560	PA14_12560
fig|287.6770.peg.1037	UCBPP-PA14	1287.86705037508	1	PA14_12560	PA14_12560
fig|287.6770.peg.1037	W16407	1242.54685348809	1	PA14_12560	PA14_12560
fig|287.6770.peg.1037	W25637	1850.47618112872	1	PA14_12560	PA14_12560
fig|287.6770.peg.1037	W36662	1105.26645850869	1	PA14_12560	PA14_12560
fig|287.6770.peg.1037	W91453	2200.31214771911	1	PA14_12560	PA14_12560
fig|287.6770.peg.1037	X9820	1274.77012373871	1	PA14_12560	PA14_12560
fig|287.6770.peg.1037	F22031	1745.79530757565	2	PA14_12560	PA14_12560
fig|287.6770.peg.1037	F30658	1148.16385669712	2	PA14_12560	PA14_12560
fig|287.6770.peg.1037	F34365	1004.95144398849	2	PA14_12560	PA14_12560
fig|287.6770.peg.1037	M1608	1010.93894139127	2	PA14_12560	PA14_12560
fig|287.6770.peg.1037	M37351	536.621911316631	2	PA14_12560	PA14_12560
fig|287.6770.peg.1037	UCBPP-PA14	1291.89435937828	2	PA14_12560	PA14_12560
fig|287.6770.peg.1037	W16407	1031.57632026983	2	PA14_12560	PA14_12560
fig|287.6770.peg.1037	W25637	1918.84536767553	2	PA14_12560	PA14_12560
fig|287.6770.peg.1037	W36662	1100.07004284747	2	PA14_12560	PA14_12560
fig|287.6770.peg.1037	W91453	1844.50291138223	2	PA14_12560	PA14_12560
fig|287.6770.peg.1037	X9820	748.501951976393	2	PA14_12560	PA14_12560
fig|287.6770.peg.1037	F22031	1751.05307629601	3	PA14_12560	PA14_12560
fig|287.6770.peg.1037	F30658	588.512635879787	3	PA14_12560	PA14_12560
fig|287.6770.peg.1037	F34365	1200.38142908831	3	PA14_12560	PA14_12560
fig|287.6770.peg.1037	M1608	842.807580303189	3	PA14_12560	PA14_12560
fig|287.6770.peg.1037	M37351	793.362810110402	3	PA14_12560	PA14_12560
fig|287.6770.peg.1037	UCBPP-PA14	1031.21405432239	3	PA14_12560	PA14_12560
fig|287.6770.peg.1037	W16407	1150.51645287934	3	PA14_12560	PA14_12560
fig|287.6770.peg.1037	W25637	1544.14496516959	3	PA14_12560	PA14_12560
fig|287.6770.peg.1037	W36662	1147.59249789632	3	PA14_12560	PA14_12560
fig|287.6770.peg.1037	W91453	1931.74314406946	3	PA14_12560	PA14_12560
fig|287.6770.peg.1037	X9820	1214.51944085053	3	PA14_12560	PA14_12560
fig|287.6770.peg.1038	F22031	152.94508255889	1	PA14_12570	PA14_12570
fig|287.6770.peg.1038	F30658	175.4222791159	1	PA14_12570	PA14_12570
fig|287.6770.peg.1038	F34365	131.200676212178	1	PA14_12570	PA14_12570
fig|287.6770.peg.1038	M1608	404.837429572301	1	PA14_12570	PA14_12570
fig|287.6770.peg.1038	M37351	197.743347412615	1	PA14_12570	PA14_12570
fig|287.6770.peg.1038	UCBPP-PA14	197.213979871821	1	PA14_12570	PA14_12570
fig|287.6770.peg.1038	W16407	190.906399336981	1	PA14_12570	PA14_12570
fig|287.6770.peg.1038	W25637	174.486587798738	1	PA14_12570	PA14_12570
fig|287.6770.peg.1038	W36662	255.201211866017	1	PA14_12570	PA14_12570
fig|287.6770.peg.1038	W91453	198.122092827813	1	PA14_12570	PA14_12570
fig|287.6770.peg.1038	X9820	141.849881123467	1	PA14_12570	PA14_12570
fig|287.6770.peg.1038	F22031	141.055864305693	2	PA14_12570	PA14_12570
fig|287.6770.peg.1038	F30658	228.242461926672	2	PA14_12570	PA14_12570
fig|287.6770.peg.1038	F34365	188.676654503767	2	PA14_12570	PA14_12570
fig|287.6770.peg.1038	M1608	459.777315152529	2	PA14_12570	PA14_12570
fig|287.6770.peg.1038	M37351	288.023597298518	2	PA14_12570	PA14_12570
fig|287.6770.peg.1038	UCBPP-PA14	186.19089398447	2	PA14_12570	PA14_12570
fig|287.6770.peg.1038	W16407	188.156020240097	2	PA14_12570	PA14_12570
fig|287.6770.peg.1038	W25637	184.777702072458	2	PA14_12570	PA14_12570
fig|287.6770.peg.1038	W36662	223.538684929377	2	PA14_12570	PA14_12570
fig|287.6770.peg.1038	W91453	186.276531644542	2	PA14_12570	PA14_12570
fig|287.6770.peg.1038	X9820	130.644041486693	2	PA14_12570	PA14_12570
fig|287.6770.peg.1038	F22031	148.820775056646	3	PA14_12570	PA14_12570
fig|287.6770.peg.1038	F30658	198.569055626921	3	PA14_12570	PA14_12570
fig|287.6770.peg.1038	F34365	254.352866040586	3	PA14_12570	PA14_12570
fig|287.6770.peg.1038	M1608	298.130067306419	3	PA14_12570	PA14_12570
fig|287.6770.peg.1038	M37351	214.133012175547	3	PA14_12570	PA14_12570
fig|287.6770.peg.1038	UCBPP-PA14	158.008605097785	3	PA14_12570	PA14_12570
fig|287.6770.peg.1038	W16407	212.788174421927	3	PA14_12570	PA14_12570
fig|287.6770.peg.1038	W25637	242.66489323721	3	PA14_12570	PA14_12570
fig|287.6770.peg.1038	W36662	231.493324145434	3	PA14_12570	PA14_12570
fig|287.6770.peg.1038	W91453	172.021981826766	3	PA14_12570	PA14_12570
fig|287.6770.peg.1038	X9820	159.099271764122	3	PA14_12570	PA14_12570
fig|287.6770.peg.1039	F22031	182.418874510343	1	fig|287.6770.peg.1039
fig|287.6770.peg.1039	F30658	102.714360798126	1	fig|287.6770.peg.1039
fig|287.6770.peg.1039	F34365	145.971613269179	1	fig|287.6770.peg.1039
fig|287.6770.peg.1039	M1608	458.960080584641	1	fig|287.6770.peg.1039
fig|287.6770.peg.1039	M37351	195.124230228342	1	fig|287.6770.peg.1039
fig|287.6770.peg.1039	UCBPP-PA14	186.25764765672	1	fig|287.6770.peg.1039
fig|287.6770.peg.1039	W16407	215.183513703533	1	fig|287.6770.peg.1039
fig|287.6770.peg.1039	W25637	145.788135858156	1	fig|287.6770.peg.1039
fig|287.6770.peg.1039	W36662	234.312856446379	1	fig|287.6770.peg.1039
fig|287.6770.peg.1039	W91453	163.414572916372	1	fig|287.6770.peg.1039
fig|287.6770.peg.1039	X9820	122.122414212256	1	fig|287.6770.peg.1039
fig|287.6770.peg.1039	F22031	137.392075622428	2	fig|287.6770.peg.1039
fig|287.6770.peg.1039	F30658	142.506714807008	2	fig|287.6770.peg.1039
fig|287.6770.peg.1039	F34365	175.767199195615	2	fig|287.6770.peg.1039
fig|287.6770.peg.1039	M1608	389.811201977144	2	fig|287.6770.peg.1039
fig|287.6770.peg.1039	M37351	263.930368627159	2	fig|287.6770.peg.1039
fig|287.6770.peg.1039	UCBPP-PA14	242.360213957439	2	fig|287.6770.peg.1039
fig|287.6770.peg.1039	W16407	157.525970433569	2	fig|287.6770.peg.1039
fig|287.6770.peg.1039	W25637	127.923024511702	2	fig|287.6770.peg.1039
fig|287.6770.peg.1039	W36662	207.770395950956	2	fig|287.6770.peg.1039
fig|287.6770.peg.1039	W91453	180.189063290145	2	fig|287.6770.peg.1039
fig|287.6770.peg.1039	X9820	171.900054587754	2	fig|287.6770.peg.1039
fig|287.6770.peg.1039	F22031	145.608815882762	3	fig|287.6770.peg.1039
fig|287.6770.peg.1039	F30658	151.085151020483	3	fig|287.6770.peg.1039
fig|287.6770.peg.1039	F34365	155.073198973131	3	fig|287.6770.peg.1039
fig|287.6770.peg.1039	M1608	479.106383823805	3	fig|287.6770.peg.1039
fig|287.6770.peg.1039	M37351	202.355696505892	3	fig|287.6770.peg.1039
fig|287.6770.peg.1039	UCBPP-PA14	206.39401527127	3	fig|287.6770.peg.1039
fig|287.6770.peg.1039	W16407	172.108082253029	3	fig|287.6770.peg.1039
fig|287.6770.peg.1039	W25637	174.415392014245	3	fig|287.6770.peg.1039
fig|287.6770.peg.1039	W36662	216.133577519671	3	fig|287.6770.peg.1039
fig|287.6770.peg.1039	W91453	159.279612802561	3	fig|287.6770.peg.1039
fig|287.6770.peg.1039	X9820	156.32428446591	3	fig|287.6770.peg.1039
fig|287.6770.peg.104	F22031	117.895167805811	1	PA14_01170	PA14_01170
fig|287.6770.peg.104	F30658	31.1605364219033	1	PA14_01170	PA14_01170
fig|287.6770.peg.104	F34365	89.4945009924131	1	PA14_01170	PA14_01170
fig|287.6770.peg.104	M1608	92.0085067209775	1	PA14_01170	PA14_01170
fig|287.6770.peg.104	M37351	111.312480331605	1	PA14_01170	PA14_01170
fig|287.6770.peg.104	UCBPP-PA14	52.7896006727602	1	PA14_01170	PA14_01170
fig|287.6770.peg.104	W16407	98.2119626646894	1	PA14_01170	PA14_01170
fig|287.6770.peg.104	W25637	159.563392789635	1	PA14_01170	PA14_01170
fig|287.6770.peg.104	W36662	50.8586044999892	1	PA14_01170	PA14_01170
fig|287.6770.peg.104	W91453	99.0610464139066	1	PA14_01170	PA14_01170
fig|287.6770.peg.104	X9820	229.214377444543	1	PA14_01170	PA14_01170
fig|287.6770.peg.104	F22031	312.337985248319	2	PA14_01170	PA14_01170
fig|287.6770.peg.104	F30658	52.1366029781738	2	PA14_01170	PA14_01170
fig|287.6770.peg.104	F34365	378.346344031239	2	PA14_01170	PA14_01170
fig|287.6770.peg.104	M1608	71.393993036107	2	PA14_01170	PA14_01170
fig|287.6770.peg.104	M37351	197.126416402028	2	PA14_01170	PA14_01170
fig|287.6770.peg.104	UCBPP-PA14	78.0129444069008	2	PA14_01170	PA14_01170
fig|287.6770.peg.104	W16407	417.881393789052	2	PA14_01170	PA14_01170
fig|287.6770.peg.104	W25637	168.195087783904	2	PA14_01170	PA14_01170
fig|287.6770.peg.104	W36662	33.3916707778323	2	PA14_01170	PA14_01170
fig|287.6770.peg.104	W91453	104.704455695625	2	PA14_01170	PA14_01170
fig|287.6770.peg.104	X9820	459.709860268966	2	PA14_01170	PA14_01170
fig|287.6770.peg.104	F22031	114.024550672898	3	PA14_01170	PA14_01170
fig|287.6770.peg.104	F30658	37.411561205072	3	PA14_01170	PA14_01170
fig|287.6770.peg.104	F34365	91.0747359048549	3	PA14_01170	PA14_01170
fig|287.6770.peg.104	M1608	158.244991737425	3	PA14_01170	PA14_01170
fig|287.6770.peg.104	M37351	248.394294123635	3	PA14_01170	PA14_01170
fig|287.6770.peg.104	UCBPP-PA14	183.713354252449	3	PA14_01170	PA14_01170
fig|287.6770.peg.104	W16407	234.692839435948	3	PA14_01170	PA14_01170
fig|287.6770.peg.104	W25637	182.946579667116	3	PA14_01170	PA14_01170
fig|287.6770.peg.104	W36662	48.2734893952564	3	PA14_01170	PA14_01170
fig|287.6770.peg.104	W91453	119.778268827526	3	PA14_01170	PA14_01170
fig|287.6770.peg.104	X9820	336.698458849653	3	PA14_01170	PA14_01170
fig|287.6770.peg.1040	F22031	536.900966899438	1	PA14_12610	PA14_12610
fig|287.6770.peg.1040	F30658	302.372612686617	1	PA14_12610	PA14_12610
fig|287.6770.peg.1040	F34365	348.420338815123	1	PA14_12610	PA14_12610
fig|287.6770.peg.1040	M1608	372.363838964897	1	PA14_12610	PA14_12610
fig|287.6770.peg.1040	M37351	239.649222360984	1	PA14_12610	PA14_12610
fig|287.6770.peg.1040	UCBPP-PA14	369.527204709322	1	PA14_12610	PA14_12610
fig|287.6770.peg.1040	W16407	279.186815215353	1	PA14_12610	PA14_12610
fig|287.6770.peg.1040	W25637	285.836581328195	1	PA14_12610	PA14_12610
fig|287.6770.peg.1040	W36662	268.824052357086	1	PA14_12610	PA14_12610
fig|287.6770.peg.1040	W91453	293.567772584278	1	PA14_12610	PA14_12610
fig|287.6770.peg.1040	X9820	293.093794109415	1	PA14_12610	PA14_12610
fig|287.6770.peg.1040	F22031	363.631026814026	2	PA14_12610	PA14_12610
fig|287.6770.peg.1040	F30658	312.819617869043	2	PA14_12610	PA14_12610
fig|287.6770.peg.1040	F34365	333.659767964557	2	PA14_12610	PA14_12610
fig|287.6770.peg.1040	M1608	368.393004066312	2	PA14_12610	PA14_12610
fig|287.6770.peg.1040	M37351	268.310955658315	2	PA14_12610	PA14_12610
fig|287.6770.peg.1040	UCBPP-PA14	392.145067218688	2	PA14_12610	PA14_12610
fig|287.6770.peg.1040	W16407	320.521592618304	2	PA14_12610	PA14_12610
fig|287.6770.peg.1040	W25637	331.652285771079	2	PA14_12610	PA14_12610
fig|287.6770.peg.1040	W36662	327.423882904855	2	PA14_12610	PA14_12610
fig|287.6770.peg.1040	W91453	301.938430378081	2	PA14_12610	PA14_12610
fig|287.6770.peg.1040	X9820	264.234941052034	2	PA14_12610	PA14_12610
fig|287.6770.peg.1040	F22031	367.76932540977	3	PA14_12610	PA14_12610
fig|287.6770.peg.1040	F30658	323.753895043892	3	PA14_12610	PA14_12610
fig|287.6770.peg.1040	F34365	293.736535621064	3	PA14_12610	PA14_12610
fig|287.6770.peg.1040	M1608	378.56398575859	3	PA14_12610	PA14_12610
fig|287.6770.peg.1040	M37351	269.807595341189	3	PA14_12610	PA14_12610
fig|287.6770.peg.1040	UCBPP-PA14	358.354444097369	3	PA14_12610	PA14_12610
fig|287.6770.peg.1040	W16407	231.563601576802	3	PA14_12610	PA14_12610
fig|287.6770.peg.1040	W25637	317.549762634631	3	PA14_12610	PA14_12610
fig|287.6770.peg.1040	W36662	311.583431551201	3	PA14_12610	PA14_12610
fig|287.6770.peg.1040	W91453	291.800250654292	3	PA14_12610	PA14_12610
fig|287.6770.peg.1040	X9820	285.823691715777	3	PA14_12610	PA14_12610
fig|287.6770.peg.1041	F22031	2044.04730128184	1	PA14_12620	PA14_12620
fig|287.6770.peg.1041	F30658	1619.19379999742	1	PA14_12620	PA14_12620
fig|287.6770.peg.1041	F34365	1110.42691522625	1	PA14_12620	PA14_12620
fig|287.6770.peg.1041	M1608	546.638775224631	1	PA14_12620	PA14_12620
fig|287.6770.peg.1041	M37351	292.031566046445	1	PA14_12620	PA14_12620
fig|287.6770.peg.1041	UCBPP-PA14	1000.01432217833	1	PA14_12620	PA14_12620
fig|287.6770.peg.1041	W16407	503.198370506723	1	PA14_12620	PA14_12620
fig|287.6770.peg.1041	W25637	511.980382619981	1	PA14_12620	PA14_12620
fig|287.6770.peg.1041	W36662	497.687772607037	1	PA14_12620	PA14_12620
fig|287.6770.peg.1041	W91453	623.289211742975	1	PA14_12620	PA14_12620
fig|287.6770.peg.1041	X9820	853.917496299546	1	PA14_12620	PA14_12620
fig|287.6770.peg.1041	F22031	1417.88622042346	2	PA14_12620	PA14_12620
fig|287.6770.peg.1041	F30658	1406.5296892334	2	PA14_12620	PA14_12620
fig|287.6770.peg.1041	F34365	701.082726735051	2	PA14_12620	PA14_12620
fig|287.6770.peg.1041	M1608	571.151944288856	2	PA14_12620	PA14_12620
fig|287.6770.peg.1041	M37351	283.643010267362	2	PA14_12620	PA14_12620
fig|287.6770.peg.1041	UCBPP-PA14	969.440855829754	2	PA14_12620	PA14_12620
fig|287.6770.peg.1041	W16407	596.192040877051	2	PA14_12620	PA14_12620
fig|287.6770.peg.1041	W25637	506.954208250078	2	PA14_12620	PA14_12620
fig|287.6770.peg.1041	W36662	471.193576531633	2	PA14_12620	PA14_12620
fig|287.6770.peg.1041	W91453	527.174759490762	2	PA14_12620	PA14_12620
fig|287.6770.peg.1041	X9820	560.885320969187	2	PA14_12620	PA14_12620
fig|287.6770.peg.1041	F22031	1391.31364882095	3	PA14_12620	PA14_12620
fig|287.6770.peg.1041	F30658	975.578403732262	3	PA14_12620	PA14_12620
fig|287.6770.peg.1041	F34365	740.084790866478	3	PA14_12620	PA14_12620
fig|287.6770.peg.1041	M1608	655.71129172966	3	PA14_12620	PA14_12620
fig|287.6770.peg.1041	M37351	292.291561619622	3	PA14_12620	PA14_12620
fig|287.6770.peg.1041	UCBPP-PA14	914.78666109244	3	PA14_12620	PA14_12620
fig|287.6770.peg.1041	W16407	591.42595537859	3	PA14_12620	PA14_12620
fig|287.6770.peg.1041	W25637	527.037814999566	3	PA14_12620	PA14_12620
fig|287.6770.peg.1041	W36662	538.688256660702	3	PA14_12620	PA14_12620
fig|287.6770.peg.1041	W91453	512.243234773037	3	PA14_12620	PA14_12620
fig|287.6770.peg.1041	X9820	774.221456200987	3	PA14_12620	PA14_12620
fig|287.6770.peg.1042	F22031	2317.27731856152	1	PA14_12630	PA14_12630
fig|287.6770.peg.1042	F30658	330.070867283865	1	PA14_12630	PA14_12630
fig|287.6770.peg.1042	F34365	2137.44148001297	1	PA14_12630	PA14_12630
fig|287.6770.peg.1042	M1608	2631.44329221996	1	PA14_12630	PA14_12630
fig|287.6770.peg.1042	M37351	2313.99003230524	1	PA14_12630	PA14_12630
fig|287.6770.peg.1042	UCBPP-PA14	1977.11994972508	1	PA14_12630	PA14_12630
fig|287.6770.peg.1042	W16407	1899.13244658349	1	PA14_12630	PA14_12630
fig|287.6770.peg.1042	W25637	350.121113675099	1	PA14_12630	PA14_12630
fig|287.6770.peg.1042	W36662	2146.05147202633	1	PA14_12630	PA14_12630
fig|287.6770.peg.1042	W91453	412.874872279859	1	PA14_12630	PA14_12630
fig|287.6770.peg.1042	X9820	1679.65289701165	1	PA14_12630	PA14_12630
fig|287.6770.peg.1042	F22031	2002.26051540418	2	PA14_12630	PA14_12630
fig|287.6770.peg.1042	F30658	421.727188534561	2	PA14_12630	PA14_12630
fig|287.6770.peg.1042	F34365	2019.83323821401	2	PA14_12630	PA14_12630
fig|287.6770.peg.1042	M1608	2240.34350147304	2	PA14_12630	PA14_12630
fig|287.6770.peg.1042	M37351	2833.14466240025	2	PA14_12630	PA14_12630
fig|287.6770.peg.1042	UCBPP-PA14	1872.31066576562	2	PA14_12630	PA14_12630
fig|287.6770.peg.1042	W16407	1911.09632185726	2	PA14_12630	PA14_12630
fig|287.6770.peg.1042	W25637	386.138018433471	2	PA14_12630	PA14_12630
fig|287.6770.peg.1042	W36662	2251.15513827219	2	PA14_12630	PA14_12630
fig|287.6770.peg.1042	W91453	370.118075947325	2	PA14_12630	PA14_12630
fig|287.6770.peg.1042	X9820	2474.37850003745	2	PA14_12630	PA14_12630
fig|287.6770.peg.1042	F22031	2111.86315682903	3	PA14_12630	PA14_12630
fig|287.6770.peg.1042	F30658	418.721704256767	3	PA14_12630	PA14_12630
fig|287.6770.peg.1042	F34365	1941.28671307105	3	PA14_12630	PA14_12630
fig|287.6770.peg.1042	M1608	2315.97228238916	3	PA14_12630	PA14_12630
fig|287.6770.peg.1042	M37351	1951.82240598011	3	PA14_12630	PA14_12630
fig|287.6770.peg.1042	UCBPP-PA14	1992.87408152039	3	PA14_12630	PA14_12630
fig|287.6770.peg.1042	W16407	2001.66915056704	3	PA14_12630	PA14_12630
fig|287.6770.peg.1042	W25637	413.288646294624	3	PA14_12630	PA14_12630
fig|287.6770.peg.1042	W36662	2205.22076555603	3	PA14_12630	PA14_12630
fig|287.6770.peg.1042	W91453	375.899886214045	3	PA14_12630	PA14_12630
fig|287.6770.peg.1042	X9820	1844.44155754453	3	PA14_12630	PA14_12630
fig|287.6770.peg.1043	F22031	231.807390753318	1	PA14_12640	PA14_12640
fig|287.6770.peg.1043	F30658	69.2456364931185	1	PA14_12640	PA14_12640
fig|287.6770.peg.1043	F34365	156.39815707412	1	PA14_12640	PA14_12640
fig|287.6770.peg.1043	M1608	192.676637603929	1	PA14_12640	PA14_12640
fig|287.6770.peg.1043	M37351	221.315402071073	1	PA14_12640	PA14_12640
fig|287.6770.peg.1043	UCBPP-PA14	141.436288594943	1	PA14_12640	PA14_12640
fig|287.6770.peg.1043	W16407	162.21526417651	1	PA14_12640	PA14_12640
fig|287.6770.peg.1043	W25637	151.527826246272	1	PA14_12640	PA14_12640
fig|287.6770.peg.1043	W36662	127.146511249973	1	PA14_12640	PA14_12640
fig|287.6770.peg.1043	W91453	49.1689865412091	1	PA14_12640	PA14_12640
fig|287.6770.peg.1043	X9820	97.6979313698051	1	PA14_12640	PA14_12640
fig|287.6770.peg.1043	F22031	211.583796458539	2	PA14_12640	PA14_12640
fig|287.6770.peg.1043	F30658	76.4670177013216	2	PA14_12640	PA14_12640
fig|287.6770.peg.1043	F34365	246.272685878601	2	PA14_12640	PA14_12640
fig|287.6770.peg.1043	M1608	191.335901336767	2	PA14_12640	PA14_12640
fig|287.6770.peg.1043	M37351	364.683870343751	2	PA14_12640	PA14_12640
fig|287.6770.peg.1043	UCBPP-PA14	123.780538458949	2	PA14_12640	PA14_12640
fig|287.6770.peg.1043	W16407	237.382886000587	2	PA14_12640	PA14_12640
fig|287.6770.peg.1043	W25637	139.767749003526	2	PA14_12640	PA14_12640
fig|287.6770.peg.1043	W36662	164.175714657675	2	PA14_12640	PA14_12640
fig|287.6770.peg.1043	W91453	53.5697215186918	2	PA14_12640	PA14_12640
fig|287.6770.peg.1043	X9820	94.2994585167109	2	PA14_12640	PA14_12640
fig|287.6770.peg.1043	F22031	223.231162584969	3	PA14_12640	PA14_12640
fig|287.6770.peg.1043	F30658	86.3343720117046	3	PA14_12640	PA14_12640
fig|287.6770.peg.1043	F34365	165.739609484511	3	PA14_12640	PA14_12640
fig|287.6770.peg.1043	M1608	132.016540068238	3	PA14_12640	PA14_12640
fig|287.6770.peg.1043	M37351	285.867571254355	3	PA14_12640	PA14_12640
fig|287.6770.peg.1043	UCBPP-PA14	190.517552558095	3	PA14_12640	PA14_12640
fig|287.6770.peg.1043	W16407	143.944941520715	3	PA14_12640	PA14_12640
fig|287.6770.peg.1043	W25637	161.144655665335	3	PA14_12640	PA14_12640
fig|287.6770.peg.1043	W36662	157.985965293566	3	PA14_12640	PA14_12640
fig|287.6770.peg.1043	W91453	57.3406606089221	3	PA14_12640	PA14_12640
fig|287.6770.peg.1043	X9820	118.399458057021	3	PA14_12640	PA14_12640
fig|287.6770.peg.1044	F22031	215.079022348439	1	PA14_12650	PA14_12650
fig|287.6770.peg.1044	F30658	220.431942836427	1	PA14_12650	PA14_12650
fig|287.6770.peg.1044	F34365	293.680983839181	1	PA14_12650	PA14_12650
fig|287.6770.peg.1044	M1608	424.321583936743	1	PA14_12650	PA14_12650
fig|287.6770.peg.1044	M37351	441.321245550009	1	PA14_12650	PA14_12650
fig|287.6770.peg.1044	UCBPP-PA14	368.531174507949	1	PA14_12650	PA14_12650
fig|287.6770.peg.1044	W16407	344.293621925653	1	PA14_12650	PA14_12650
fig|287.6770.peg.1044	W25637	389.15100831429	1	PA14_12650	PA14_12650
fig|287.6770.peg.1044	W36662	290.620597142795	1	PA14_12650	PA14_12650
fig|287.6770.peg.1044	W91453	196.675946164837	1	PA14_12650	PA14_12650
fig|287.6770.peg.1044	X9820	201.971685043347	1	PA14_12650	PA14_12650
fig|287.6770.peg.1044	F22031	188.685117188134	2	PA14_12650	PA14_12650
fig|287.6770.peg.1044	F30658	264.158788422747	2	PA14_12650	PA14_12650
fig|287.6770.peg.1044	F34365	346.569223272709	2	PA14_12650	PA14_12650
fig|287.6770.peg.1044	M1608	444.070636684585	2	PA14_12650	PA14_12650
fig|287.6770.peg.1044	M37351	487.340307216124	2	PA14_12650	PA14_12650
fig|287.6770.peg.1044	UCBPP-PA14	392.145067218688	2	PA14_12650	PA14_12650
fig|287.6770.peg.1044	W16407	331.460896120635	2	PA14_12650	PA14_12650
fig|287.6770.peg.1044	W25637	356.52620720391	2	PA14_12650	PA14_12650
fig|287.6770.peg.1044	W36662	361.743100093183	2	PA14_12650	PA14_12650
fig|287.6770.peg.1044	W91453	217.931367087405	2	PA14_12650	PA14_12650
fig|287.6770.peg.1044	X9820	145.378331879929	2	PA14_12650	PA14_12650
fig|287.6770.peg.1044	F22031	209.847999360451	3	PA14_12650	PA14_12650
fig|287.6770.peg.1044	F30658	198.569055626921	3	PA14_12650	PA14_12650
fig|287.6770.peg.1044	F34365	379.888312828359	3	PA14_12650	PA14_12650
fig|287.6770.peg.1044	M1608	250.044572579577	3	PA14_12650	PA14_12650
fig|287.6770.peg.1044	M37351	489.293932821125	3	PA14_12650	PA14_12650
fig|287.6770.peg.1044	UCBPP-PA14	381.791127150151	3	PA14_12650	PA14_12650
fig|287.6770.peg.1044	W16407	368.206988092844	3	PA14_12650	PA14_12650
fig|287.6770.peg.1044	W25637	375.37225672631	3	PA14_12650	PA14_12650
fig|287.6770.peg.1044	W36662	364.245419982389	3	PA14_12650	PA14_12650
fig|287.6770.peg.1044	W91453	252.298906679257	3	PA14_12650	PA14_12650
fig|287.6770.peg.1044	X9820	260.848806031874	3	PA14_12650	PA14_12650
fig|287.6770.peg.1045	F22031	1326.32063781538	1	PA14_12670	PA14_12670
fig|287.6770.peg.1045	F30658	1360.67675708978	1	PA14_12670	PA14_12670
fig|287.6770.peg.1045	F34365	1215.56123192608	1	PA14_12670	PA14_12670
fig|287.6770.peg.1045	M1608	1217.75964777764	1	PA14_12670	PA14_12670
fig|287.6770.peg.1045	M37351	959.906448036073	1	PA14_12670	PA14_12670
fig|287.6770.peg.1045	UCBPP-PA14	1120.53397654444	1	PA14_12670	PA14_12670
fig|287.6770.peg.1045	W16407	1020.74230859368	1	PA14_12670	PA14_12670
fig|287.6770.peg.1045	W25637	1159.41745839951	1	PA14_12670	PA14_12670
fig|287.6770.peg.1045	W36662	1376.81507896399	1	PA14_12670	PA14_12670
fig|287.6770.peg.1045	W91453	1042.67174400623	1	PA14_12670	PA14_12670
fig|287.6770.peg.1045	X9820	932.827363944389	1	PA14_12670	PA14_12670
fig|287.6770.peg.1045	F22031	1231.94894474777	2	PA14_12670	PA14_12670
fig|287.6770.peg.1045	F30658	1180.60440966131	2	PA14_12670	PA14_12670
fig|287.6770.peg.1045	F34365	1007.9305490596	2	PA14_12670	PA14_12670
fig|287.6770.peg.1045	M1608	1277.95247534631	2	PA14_12670	PA14_12670
fig|287.6770.peg.1045	M37351	917.732983027218	2	PA14_12670	PA14_12670
fig|287.6770.peg.1045	UCBPP-PA14	1112.98467353845	2	PA14_12670	PA14_12670
fig|287.6770.peg.1045	W16407	944.061892251183	2	PA14_12670	PA14_12670
fig|287.6770.peg.1045	W25637	1183.28797673324	2	PA14_12670	PA14_12670
fig|287.6770.peg.1045	W36662	1383.89924445905	2	PA14_12670	PA14_12670
fig|287.6770.peg.1045	W91453	1081.13437974087	2	PA14_12670	PA14_12670
fig|287.6770.peg.1045	X9820	900.756286039832	2	PA14_12670	PA14_12670
fig|287.6770.peg.1045	F22031	1453.94685271169	3	PA14_12670	PA14_12670
fig|287.6770.peg.1045	F30658	1182.78089656035	3	PA14_12670	PA14_12670
fig|287.6770.peg.1045	F34365	1156.07480081028	3	PA14_12670	PA14_12670
fig|287.6770.peg.1045	M1608	1065.74941949127	3	PA14_12670	PA14_12670
fig|287.6770.peg.1045	M37351	1207.71018867009	3	PA14_12670	PA14_12670
fig|287.6770.peg.1045	UCBPP-PA14	1082.62355263171	3	PA14_12670	PA14_12670
fig|287.6770.peg.1045	W16407	1124.43947071979	3	PA14_12670	PA14_12670
fig|287.6770.peg.1045	W25637	1165.92897922566	3	PA14_12670	PA14_12670
fig|287.6770.peg.1045	W36662	1272.6647204204	3	PA14_12670	PA14_12670
fig|287.6770.peg.1045	W91453	1125.15118483729	3	PA14_12670	PA14_12670
fig|287.6770.peg.1045	X9820	1116.46988964706	3	PA14_12670	PA14_12670
fig|287.6770.peg.1046	F22031	1213.20500383953	1	PA14_12680	PA14_12680
fig|287.6770.peg.1046	F30658	841.33448339139	1	PA14_12680	PA14_12680
fig|287.6770.peg.1046	F34365	1093.04934221802	1	PA14_12680	PA14_12680
fig|287.6770.peg.1046	M1608	473.031969847849	1	PA14_12680	PA14_12680
fig|287.6770.peg.1046	M37351	764.782217807731	1	PA14_12680	PA14_12680
fig|287.6770.peg.1046	UCBPP-PA14	797.820191299641	1	PA14_12680	PA14_12680
fig|287.6770.peg.1046	W16407	1004.18973061649	1	PA14_12680	PA14_12680
fig|287.6770.peg.1046	W25637	399.4824510129	1	PA14_12680	PA14_12680
fig|287.6770.peg.1046	W36662	646.630828642719	1	PA14_12680	PA14_12680
fig|287.6770.peg.1046	W91453	557.489538577533	1	PA14_12680	PA14_12680
fig|287.6770.peg.1046	X9820	948.797218110607	1	PA14_12680	PA14_12680
fig|287.6770.peg.1046	F22031	1300.64498255898	2	PA14_12680	PA14_12680
fig|287.6770.peg.1046	F30658	570.026859228034	2	PA14_12680	PA14_12680
fig|287.6770.peg.1046	F34365	728.887707398764	2	PA14_12680	PA14_12680
fig|287.6770.peg.1046	M1608	434.07547765953	2	PA14_12680	PA14_12680
fig|287.6770.peg.1046	M37351	408.489740655313	2	PA14_12680	PA14_12680
fig|287.6770.peg.1046	UCBPP-PA14	774.928581108548	2	PA14_12680	PA14_12680
fig|287.6770.peg.1046	W16407	703.397215199896	2	PA14_12680	PA14_12680
fig|287.6770.peg.1046	W25637	522.35235008945	2	PA14_12680	PA14_12680
fig|287.6770.peg.1046	W36662	512.005618593428	2	PA14_12680	PA14_12680
fig|287.6770.peg.1046	W91453	585.614455692972	2	PA14_12680	PA14_12680
fig|287.6770.peg.1046	X9820	509.806447605968	2	PA14_12680	PA14_12680
fig|287.6770.peg.1046	F22031	1406.83811816139	3	PA14_12680	PA14_12680
fig|287.6770.peg.1046	F30658	729.525443498904	3	PA14_12680	PA14_12680
fig|287.6770.peg.1046	F34365	1045.30823011518	3	PA14_12680	PA14_12680
fig|287.6770.peg.1046	M1608	748.385154294118	3	PA14_12680	PA14_12680
fig|287.6770.peg.1046	M37351	407.923388194417	3	PA14_12680	PA14_12680
fig|287.6770.peg.1046	UCBPP-PA14	914.03063905848	3	PA14_12680	PA14_12680
fig|287.6770.peg.1046	W16407	1312.19374226855	3	PA14_12680	PA14_12680
fig|287.6770.peg.1046	W25637	662.588907706289	3	PA14_12680	PA14_12680
fig|287.6770.peg.1046	W36662	701.062720990201	3	PA14_12680	PA14_12680
fig|287.6770.peg.1046	W91453	514.791708577878	3	PA14_12680	PA14_12680
fig|287.6770.peg.1046	X9820	764.971498540282	3	PA14_12680	PA14_12680
fig|287.6770.peg.1047	F22031	910.501194608394	1	PA14_12690	PA14_12690
fig|287.6770.peg.1047	F30658	574.738782892883	1	PA14_12690	PA14_12690
fig|287.6770.peg.1047	F34365	518.720554295831	1	PA14_12690	PA14_12690
fig|287.6770.peg.1047	M1608	347.467419499221	1	PA14_12690	PA14_12690
fig|287.6770.peg.1047	M37351	293.341124638582	1	PA14_12690	PA14_12690
fig|287.6770.peg.1047	UCBPP-PA14	404.388261757371	1	PA14_12690	PA14_12690
fig|287.6770.peg.1047	W16407	451.33362617818	1	PA14_12690	PA14_12690
fig|287.6770.peg.1047	W25637	306.499466725414	1	PA14_12690	PA14_12690
fig|287.6770.peg.1047	W36662	348.744716571354	1	PA14_12690	PA14_12690
fig|287.6770.peg.1047	W91453	339.844465799534	1	PA14_12690	PA14_12690
fig|287.6770.peg.1047	X9820	403.943370086694	1	PA14_12690	PA14_12690
fig|287.6770.peg.1047	F22031	962.660476527812	2	PA14_12690	PA14_12690
fig|287.6770.peg.1047	F30658	411.299867938927	2	PA14_12690	PA14_12690
fig|287.6770.peg.1047	F34365	419.060780003104	2	PA14_12690	PA14_12690
fig|287.6770.peg.1047	M1608	274.152933258651	2	PA14_12690	PA14_12690
fig|287.6770.peg.1047	M37351	240.932286713589	2	PA14_12690	PA14_12690
fig|287.6770.peg.1047	UCBPP-PA14	368.221097600572	2	PA14_12690	PA14_12690
fig|287.6770.peg.1047	W16407	354.433433475531	2	PA14_12690	PA14_12690
fig|287.6770.peg.1047	W25637	284.273387803782	2	PA14_12690	PA14_12690
fig|287.6770.peg.1047	W36662	321.858604441883	2	PA14_12690	PA14_12690
fig|287.6770.peg.1047	W91453	316.548354428633	2	PA14_12690	PA14_12690
fig|287.6770.peg.1047	X9820	322.189816598762	2	PA14_12690	PA14_12690
fig|287.6770.peg.1047	F22031	1067.97642531658	3	PA14_12690	PA14_12690
fig|287.6770.peg.1047	F30658	443.183109660084	3	PA14_12690	PA14_12690
fig|287.6770.peg.1047	F34365	576.806660730748	3	PA14_12690	PA14_12690
fig|287.6770.peg.1047	M1608	374.192577147059	3	PA14_12690	PA14_12690
fig|287.6770.peg.1047	M37351	193.79037601887	3	PA14_12690	PA14_12690
fig|287.6770.peg.1047	UCBPP-PA14	348.52615765588	3	PA14_12690	PA14_12690
fig|287.6770.peg.1047	W16407	455.825648148931	3	PA14_12690	PA14_12690
fig|287.6770.peg.1047	W25637	363.049430116608	3	PA14_12690	PA14_12690
fig|287.6770.peg.1047	W36662	398.256287510866	3	PA14_12690	PA14_12690
fig|287.6770.peg.1047	W91453	324.930410117225	3	PA14_12690	PA14_12690
fig|287.6770.peg.1047	X9820	496.722726379845	3	PA14_12690	PA14_12690
fig|287.6770.peg.1048	F22031	442.903468243453	1	PA14_12700	PA14_12700
fig|287.6770.peg.1048	F30658	367.001873413528	1	PA14_12700	PA14_12700
fig|287.6770.peg.1048	F34365	349.289217465535	1	PA14_12700	PA14_12700
fig|287.6770.peg.1048	M1608	402.672523531807	1	PA14_12700	PA14_12700
fig|287.6770.peg.1048	M37351	374.533757351046	1	PA14_12700	PA14_12700
fig|287.6770.peg.1048	UCBPP-PA14	388.451778535406	1	PA14_12700	PA14_12700
fig|287.6770.peg.1048	W16407	414.917954628351	1	PA14_12700	PA14_12700
fig|287.6770.peg.1048	W25637	439.660283729714	1	PA14_12700	PA14_12700
fig|287.6770.peg.1048	W36662	458.635629865974	1	PA14_12700	PA14_12700
fig|287.6770.peg.1048	W91453	409.259505622417	1	PA14_12700	PA14_12700
fig|287.6770.peg.1048	X9820	404.882773272942	1	PA14_12700	PA14_12700
fig|287.6770.peg.1048	F22031	375.538340034636	2	PA14_12700	PA14_12700
fig|287.6770.peg.1048	F30658	400.872547343292	2	PA14_12700	PA14_12700
fig|287.6770.peg.1048	F34365	446.865760666817	2	PA14_12700	PA14_12700
fig|287.6770.peg.1048	M1608	398.378481141477	2	PA14_12700	PA14_12700
fig|287.6770.peg.1048	M37351	374.540191163853	2	PA14_12700	PA14_12700
fig|287.6770.peg.1048	UCBPP-PA14	408.78782869216	2	PA14_12700	PA14_12700
fig|287.6770.peg.1048	W16407	354.433433475531	2	PA14_12700	PA14_12700
fig|287.6770.peg.1048	W25637	390.8759082302	2	PA14_12700	PA14_12700
fig|287.6770.peg.1048	W36662	426.671348827857	2	PA14_12700	PA14_12700
fig|287.6770.peg.1048	W91453	418.817822782499	2	PA14_12700	PA14_12700
fig|287.6770.peg.1048	X9820	473.461864635986	2	PA14_12700	PA14_12700
fig|287.6770.peg.1048	F22031	404.706855909441	3	PA14_12700	PA14_12700
fig|287.6770.peg.1048	F30658	401.454829854427	3	PA14_12700	PA14_12700
fig|287.6770.peg.1048	F34365	417.630996176317	3	PA14_12700	PA14_12700
fig|287.6770.peg.1048	M1608	370.695450257834	3	PA14_12700	PA14_12700
fig|287.6770.peg.1048	M37351	416.488708681439	3	PA14_12700	PA14_12700
fig|287.6770.peg.1048	UCBPP-PA14	392.3754356256	3	PA14_12700	PA14_12700
fig|287.6770.peg.1048	W16407	372.379305238372	3	PA14_12700	PA14_12700
fig|287.6770.peg.1048	W25637	444.569667688483	3	PA14_12700	PA14_12700
fig|287.6770.peg.1048	W36662	460.792398772902	3	PA14_12700	PA14_12700
fig|287.6770.peg.1048	W91453	420.498177798762	3	PA14_12700	PA14_12700
fig|287.6770.peg.1048	X9820	462.497883035237	3	PA14_12700	PA14_12700
fig|287.6770.peg.1049	F22031	126.657646494081	1	PA14_12710	PA14_12710
fig|287.6770.peg.1049	F30658	117.717582038301	1	PA14_12710	PA14_12710
fig|287.6770.peg.1049	F34365	106.872074000649	1	PA14_12710	PA14_12710
fig|287.6770.peg.1049	M1608	488.186312131304	1	PA14_12710	PA14_12710
fig|287.6770.peg.1049	M37351	157.147031056383	1	PA14_12710	PA14_12710
fig|287.6770.peg.1049	UCBPP-PA14	216.138553697905	1	PA14_12710	PA14_12710
fig|287.6770.peg.1049	W16407	105.936499054047	1	PA14_12710	PA14_12710
fig|287.6770.peg.1049	W25637	95.2788604427318	1	PA14_12710	PA14_12710
fig|287.6770.peg.1049	W36662	121.697375053545	1	PA14_12710	PA14_12710
fig|287.6770.peg.1049	W91453	77.3688464692555	1	PA14_12710	PA14_12710
fig|287.6770.peg.1049	X9820	96.7585281835569	1	PA14_12710	PA14_12710
fig|287.6770.peg.1049	F22031	112.661502010391	2	PA14_12710	PA14_12710
fig|287.6770.peg.1049	F30658	100.797432424469	2	PA14_12710	PA14_12710
fig|287.6770.peg.1049	F34365	101.289572417812	2	PA14_12710	PA14_12710
fig|287.6770.peg.1049	M1608	455.493675570363	2	PA14_12710	PA14_12710
fig|287.6770.peg.1049	M37351	165.367160426145	2	PA14_12710	PA14_12710
fig|287.6770.peg.1049	UCBPP-PA14	157.066061405894	2	PA14_12710	PA14_12710
fig|287.6770.peg.1049	W16407	91.8901494195821	2	PA14_12710	PA14_12710
fig|287.6770.peg.1049	W25637	91.2043785870468	2	PA14_12710	PA14_12710
fig|287.6770.peg.1049	W36662	116.870847722413	2	PA14_12710	PA14_12710
fig|287.6770.peg.1049	W91453	104.704455695625	2	PA14_12710	PA14_12710
fig|287.6770.peg.1049	X9820	134.573185591556	2	PA14_12710	PA14_12710
fig|287.6770.peg.1049	F22031	113.489224143917	3	PA14_12710	PA14_12710
fig|287.6770.peg.1049	F30658	100.723434013655	3	PA14_12710	PA14_12710
fig|287.6770.peg.1049	F34365	127.996926136553	3	PA14_12710	PA14_12710
fig|287.6770.peg.1049	M1608	686.311152010377	3	PA14_12710	PA14_12710
fig|287.6770.peg.1049	M37351	178.801065166582	3	PA14_12710	PA14_12710
fig|287.6770.peg.1049	UCBPP-PA14	207.906059339191	3	PA14_12710	PA14_12710
fig|287.6770.peg.1049	W16407	138.729545088805	3	PA14_12710	PA14_12710
fig|287.6770.peg.1049	W25637	116.592897922566	3	PA14_12710	PA14_12710
fig|287.6770.peg.1049	W36662	137.140594872888	3	PA14_12710	PA14_12710
fig|287.6770.peg.1049	W91453	72.631503437968	3	PA14_12710	PA14_12710
fig|287.6770.peg.1049	X9820	117.47446229095	3	PA14_12710	PA14_12710
fig|287.6770.peg.105	F22031	168.876861992108	1	PA14_01180	PA14_01180
fig|287.6770.peg.105	F30658	32.3146303634553	1	PA14_01180	PA14_01180
fig|287.6770.peg.105	F34365	271.090138928475	1	PA14_01180	PA14_01180
fig|287.6770.peg.105	M1608	153.708328875045	1	PA14_01180	PA14_01180
fig|287.6770.peg.105	M37351	218.6962848868	1	PA14_01180	PA14_01180
fig|287.6770.peg.105	UCBPP-PA14	88.6466879221823	1	PA14_01180	PA14_01180
fig|287.6770.peg.105	W16407	178.767842153704	1	PA14_01180	PA14_01180
fig|287.6770.peg.105	W25637	398.334512935276	1	PA14_01180	PA14_01180
fig|287.6770.peg.105	W36662	56.3077406964166	1	PA14_01180	PA14_01180
fig|287.6770.peg.105	W91453	204.629752811209	1	PA14_01180	PA14_01180
fig|287.6770.peg.105	X9820	446.21651346786	1	PA14_01180	PA14_01180
fig|287.6770.peg.105	F22031	837.175714125994	2	PA14_01180	PA14_01180
fig|287.6770.peg.105	F30658	25.4890059004405	2	PA14_01180	PA14_01180
fig|287.6770.peg.105	F34365	1261.15448010413	2	PA14_01180	PA14_01180
fig|287.6770.peg.105	M1608	131.364947186437	2	PA14_01180	PA14_01180
fig|287.6770.peg.105	M37351	434.77326284225	2	PA14_01180	PA14_01180
fig|287.6770.peg.105	UCBPP-PA14	143.543817708697	2	PA14_01180	PA14_01180
fig|287.6770.peg.105	W16407	1002.04020081354	2	PA14_01180	PA14_01180
fig|287.6770.peg.105	W25637	318.623088830073	2	PA14_01180	PA14_01180
fig|287.6770.peg.105	W36662	56.5803310402158	2	PA14_01180	PA14_01180
fig|287.6770.peg.105	W91453	214.278886074767	2	PA14_01180	PA14_01180
fig|287.6770.peg.105	X9820	1207.22952621914	2	PA14_01180	PA14_01180
fig|287.6770.peg.105	F22031	201.81810142574	3	PA14_01180	PA14_01180
fig|287.6770.peg.105	F30658	34.5337488046818	3	PA14_01180	PA14_01180
fig|287.6770.peg.105	F34365	414.349023711277	3	PA14_01180	PA14_01180
fig|287.6770.peg.105	M1608	333.101336198667	3	PA14_01180	PA14_01180
fig|287.6770.peg.105	M37351	407.923388194417	3	PA14_01180	PA14_01180
fig|287.6770.peg.105	UCBPP-PA14	365.914664436976	3	PA14_01180	PA14_01180
fig|287.6770.peg.105	W16407	673.829219002767	3	PA14_01180	PA14_01180
fig|287.6770.peg.105	W25637	417.080285251455	3	PA14_01180	PA14_01180
fig|287.6770.peg.105	W36662	65.827485538986	3	PA14_01180	PA14_01180
fig|287.6770.peg.105	W91453	268.863986410724	3	PA14_01180	PA14_01180
fig|287.6770.peg.105	X9820	796.421354586678	3	PA14_01180	PA14_01180
fig|287.6770.peg.1050	F22031	234.197157668301	1	PA14_12730	PA14_12730
fig|287.6770.peg.1050	F30658	245.822009550571	1	PA14_12730	PA14_12730
fig|287.6770.peg.1050	F34365	170.300215480708	1	PA14_12730	PA14_12730
fig|287.6770.peg.1050	M1608	234.892305393554	1	PA14_12730	PA14_12730
fig|287.6770.peg.1050	M37351	163.694824017066	1	PA14_12730	PA14_12730
fig|287.6770.peg.1050	UCBPP-PA14	253.987701350073	1	PA14_12730	PA14_12730
fig|287.6770.peg.1050	W16407	177.664336955225	1	PA14_12730	PA14_12730
fig|287.6770.peg.1050	W25637	158.415454712012	1	PA14_12730	PA14_12730
fig|287.6770.peg.1050	W36662	237.945613910664	1	PA14_12730	PA14_12730
fig|287.6770.peg.1050	W91453	178.599112877627	1	PA14_12730	PA14_12730
fig|287.6770.peg.1050	X9820	199.153475484603	1	PA14_12730	PA14_12730
fig|287.6770.peg.1050	F22031	206.088113433642	2	PA14_12730	PA14_12730
fig|287.6770.peg.1050	F30658	242.145556054185	2	PA14_12730	PA14_12730
fig|287.6770.peg.1050	F34365	141.010973365973	2	PA14_12730	PA14_12730
fig|287.6770.peg.1050	M1608	254.162615208541	2	PA14_12730	PA14_12730
fig|287.6770.peg.1050	M37351	185.079802066348	2	PA14_12730	PA14_12730
fig|287.6770.peg.1050	UCBPP-PA14	226.757625076058	2	PA14_12730	PA14_12730
fig|287.6770.peg.1050	W16407	138.929154479606	2	PA14_12730	PA14_12730
fig|287.6770.peg.1050	W25637	171.748505131452	2	PA14_12730	PA14_12730
fig|287.6770.peg.1050	W36662	254.147716475723	2	PA14_12730	PA14_12730
fig|287.6770.peg.1050	W91453	169.231620252231	2	PA14_12730	PA14_12730
fig|287.6770.peg.1050	X9820	193.510347164501	2	PA14_12730	PA14_12730
fig|287.6770.peg.1050	F22031	215.736591179239	3	PA14_12730	PA14_12730
fig|287.6770.peg.1050	F30658	246.052960233358	3	PA14_12730	PA14_12730
fig|287.6770.peg.1050	F34365	167.380595717031	3	PA14_12730	PA14_12730
fig|287.6770.peg.1050	M1608	198.46195096351	3	PA14_12730	PA14_12730
fig|287.6770.peg.1050	M37351	159.529094070783	3	PA14_12730	PA14_12730
fig|287.6770.peg.1050	UCBPP-PA14	209.418103407112	3	PA14_12730	PA14_12730
fig|287.6770.peg.1050	W16407	183.581954403231	3	PA14_12730	PA14_12730
fig|287.6770.peg.1050	W25637	206.644323147312	3	PA14_12730	PA14_12730
fig|287.6770.peg.1050	W36662	241.367446976282	3	PA14_12730	PA14_12730
fig|287.6770.peg.1050	W91453	159.279612802561	3	PA14_12730	PA14_12730
fig|287.6770.peg.1050	X9820	189.624132044447	3	PA14_12730	PA14_12730
fig|287.6770.peg.1051	F22031	1871.18749443142	1	PA14_12740	PA14_12740
fig|287.6770.peg.1051	F30658	1723.0622547371	1	PA14_12740	PA14_12740
fig|287.6770.peg.1051	F34365	1386.7303260572	1	PA14_12740	PA14_12740
fig|287.6770.peg.1051	M1608	1276.21211087097	1	PA14_12740	PA14_12740
fig|287.6770.peg.1051	M37351	251.435249690213	1	PA14_12740	PA14_12740
fig|287.6770.peg.1051	UCBPP-PA14	1423.32715776178	1	PA14_12740	PA14_12740
fig|287.6770.peg.1051	W16407	472.300224949293	1	PA14_12740	PA14_12740
fig|287.6770.peg.1051	W25637	462.61904528218	1	PA14_12740	PA14_12740
fig|287.6770.peg.1051	W36662	910.005744803378	1	PA14_12740	PA14_12740
fig|287.6770.peg.1051	W91453	513.382065356742	1	PA14_12740	PA14_12740
fig|287.6770.peg.1051	X9820	967.585281835569	1	PA14_12740	PA14_12740
fig|287.6770.peg.1051	F22031	1404.14701286121	2	PA14_12740	PA14_12740
fig|287.6770.peg.1051	F30658	1391.46800392859	2	PA14_12740	PA14_12740
fig|287.6770.peg.1051	F34365	764.63696825211	2	PA14_12740	PA14_12740
fig|287.6770.peg.1051	M1608	1039.49653860572	2	PA14_12740	PA14_12740
fig|287.6770.peg.1051	M37351	212.458471011074	2	PA14_12740	PA14_12740
fig|287.6770.peg.1051	UCBPP-PA14	1325.17988232522	2	PA14_12740	PA14_12740
fig|287.6770.peg.1051	W16407	607.131344379382	2	PA14_12740	PA14_12740
fig|287.6770.peg.1051	W25637	383.769073535106	2	PA14_12740	PA14_12740
fig|287.6770.peg.1051	W36662	621.456095031878	2	PA14_12740	PA14_12740
fig|287.6770.peg.1051	W91453	665.969037971009	2	PA14_12740	PA14_12740
fig|287.6770.peg.1051	X9820	788.775679051238	2	PA14_12740	PA14_12740
fig|287.6770.peg.1051	F22031	1281.5717103799	3	PA14_12740	PA14_12740
fig|287.6770.peg.1051	F30658	869.099344917827	3	PA14_12740	PA14_12740
fig|287.6770.peg.1051	F34365	682.650272728282	3	PA14_12740	PA14_12740
fig|287.6770.peg.1051	M1608	1801.0203479508	3	PA14_12740	PA14_12740
fig|287.6770.peg.1051	M37351	202.355696505892	3	PA14_12740	PA14_12740
fig|287.6770.peg.1051	UCBPP-PA14	1084.8916187336	3	PA14_12740	PA14_12740
fig|287.6770.peg.1051	W16407	600.813668956028	3	PA14_12740	PA14_12740
fig|287.6770.peg.1051	W25637	582.96448961283	3	PA14_12740	PA14_12740
fig|287.6770.peg.1051	W36662	890.865304294278	3	PA14_12740	PA14_12740
fig|287.6770.peg.1051	W91453	351.689385068056	3	PA14_12740	PA14_12740
fig|287.6770.peg.1051	X9820	816.771261440229	3	PA14_12740	PA14_12740
fig|287.6770.peg.1052	F22031	610.9837412639	1	PA14_12750	PA14_12750
fig|287.6770.peg.1052	F30658	642.83032544445	1	PA14_12750	PA14_12750
fig|287.6770.peg.1052	F34365	594.312996881656	1	PA14_12750	PA14_12750
fig|287.6770.peg.1052	M1608	676.533137654246	1	PA14_12750	PA14_12750
fig|287.6770.peg.1052	M37351	500.251382196153	1	PA14_12750	PA14_12750
fig|287.6770.peg.1052	UCBPP-PA14	608.574453038802	1	PA14_12750	PA14_12750
fig|287.6770.peg.1052	W16407	459.058162567537	1	PA14_12750	PA14_12750
fig|287.6770.peg.1052	W25637	532.6432680172	1	PA14_12750	PA14_12750
fig|287.6770.peg.1052	W36662	694.764865044495	1	PA14_12750	PA14_12750
fig|287.6770.peg.1052	W91453	486.628352091673	1	PA14_12750	PA14_12750
fig|287.6770.peg.1052	X9820	448.095319840356	1	PA14_12750	PA14_12750
fig|287.6770.peg.1052	F22031	457.057638237277	2	PA14_12750	PA14_12750
fig|287.6770.peg.1052	F30658	587.405726887425	2	PA14_12750	PA14_12750
fig|287.6770.peg.1052	F34365	488.573231662387	2	PA14_12750	PA14_12750
fig|287.6770.peg.1052	M1608	735.358128271902	2	PA14_12750	PA14_12750
fig|287.6770.peg.1052	M37351	539.907351589998	2	PA14_12750	PA14_12750
fig|287.6770.peg.1052	UCBPP-PA14	560.653027137594	2	PA14_12750	PA14_12750
fig|287.6770.peg.1052	W16407	543.683384065861	2	PA14_12750	PA14_12750
fig|287.6770.peg.1052	W25637	542.488381725551	2	PA14_12750	PA14_12750
[truncated: 201,347 more rows]
