# Supplementary figures and images for: Evolution and regulation of microbial secondary metabolism
Source: eLife journal article supplement (doi:10.7554/elife.76119), 2022-11-21

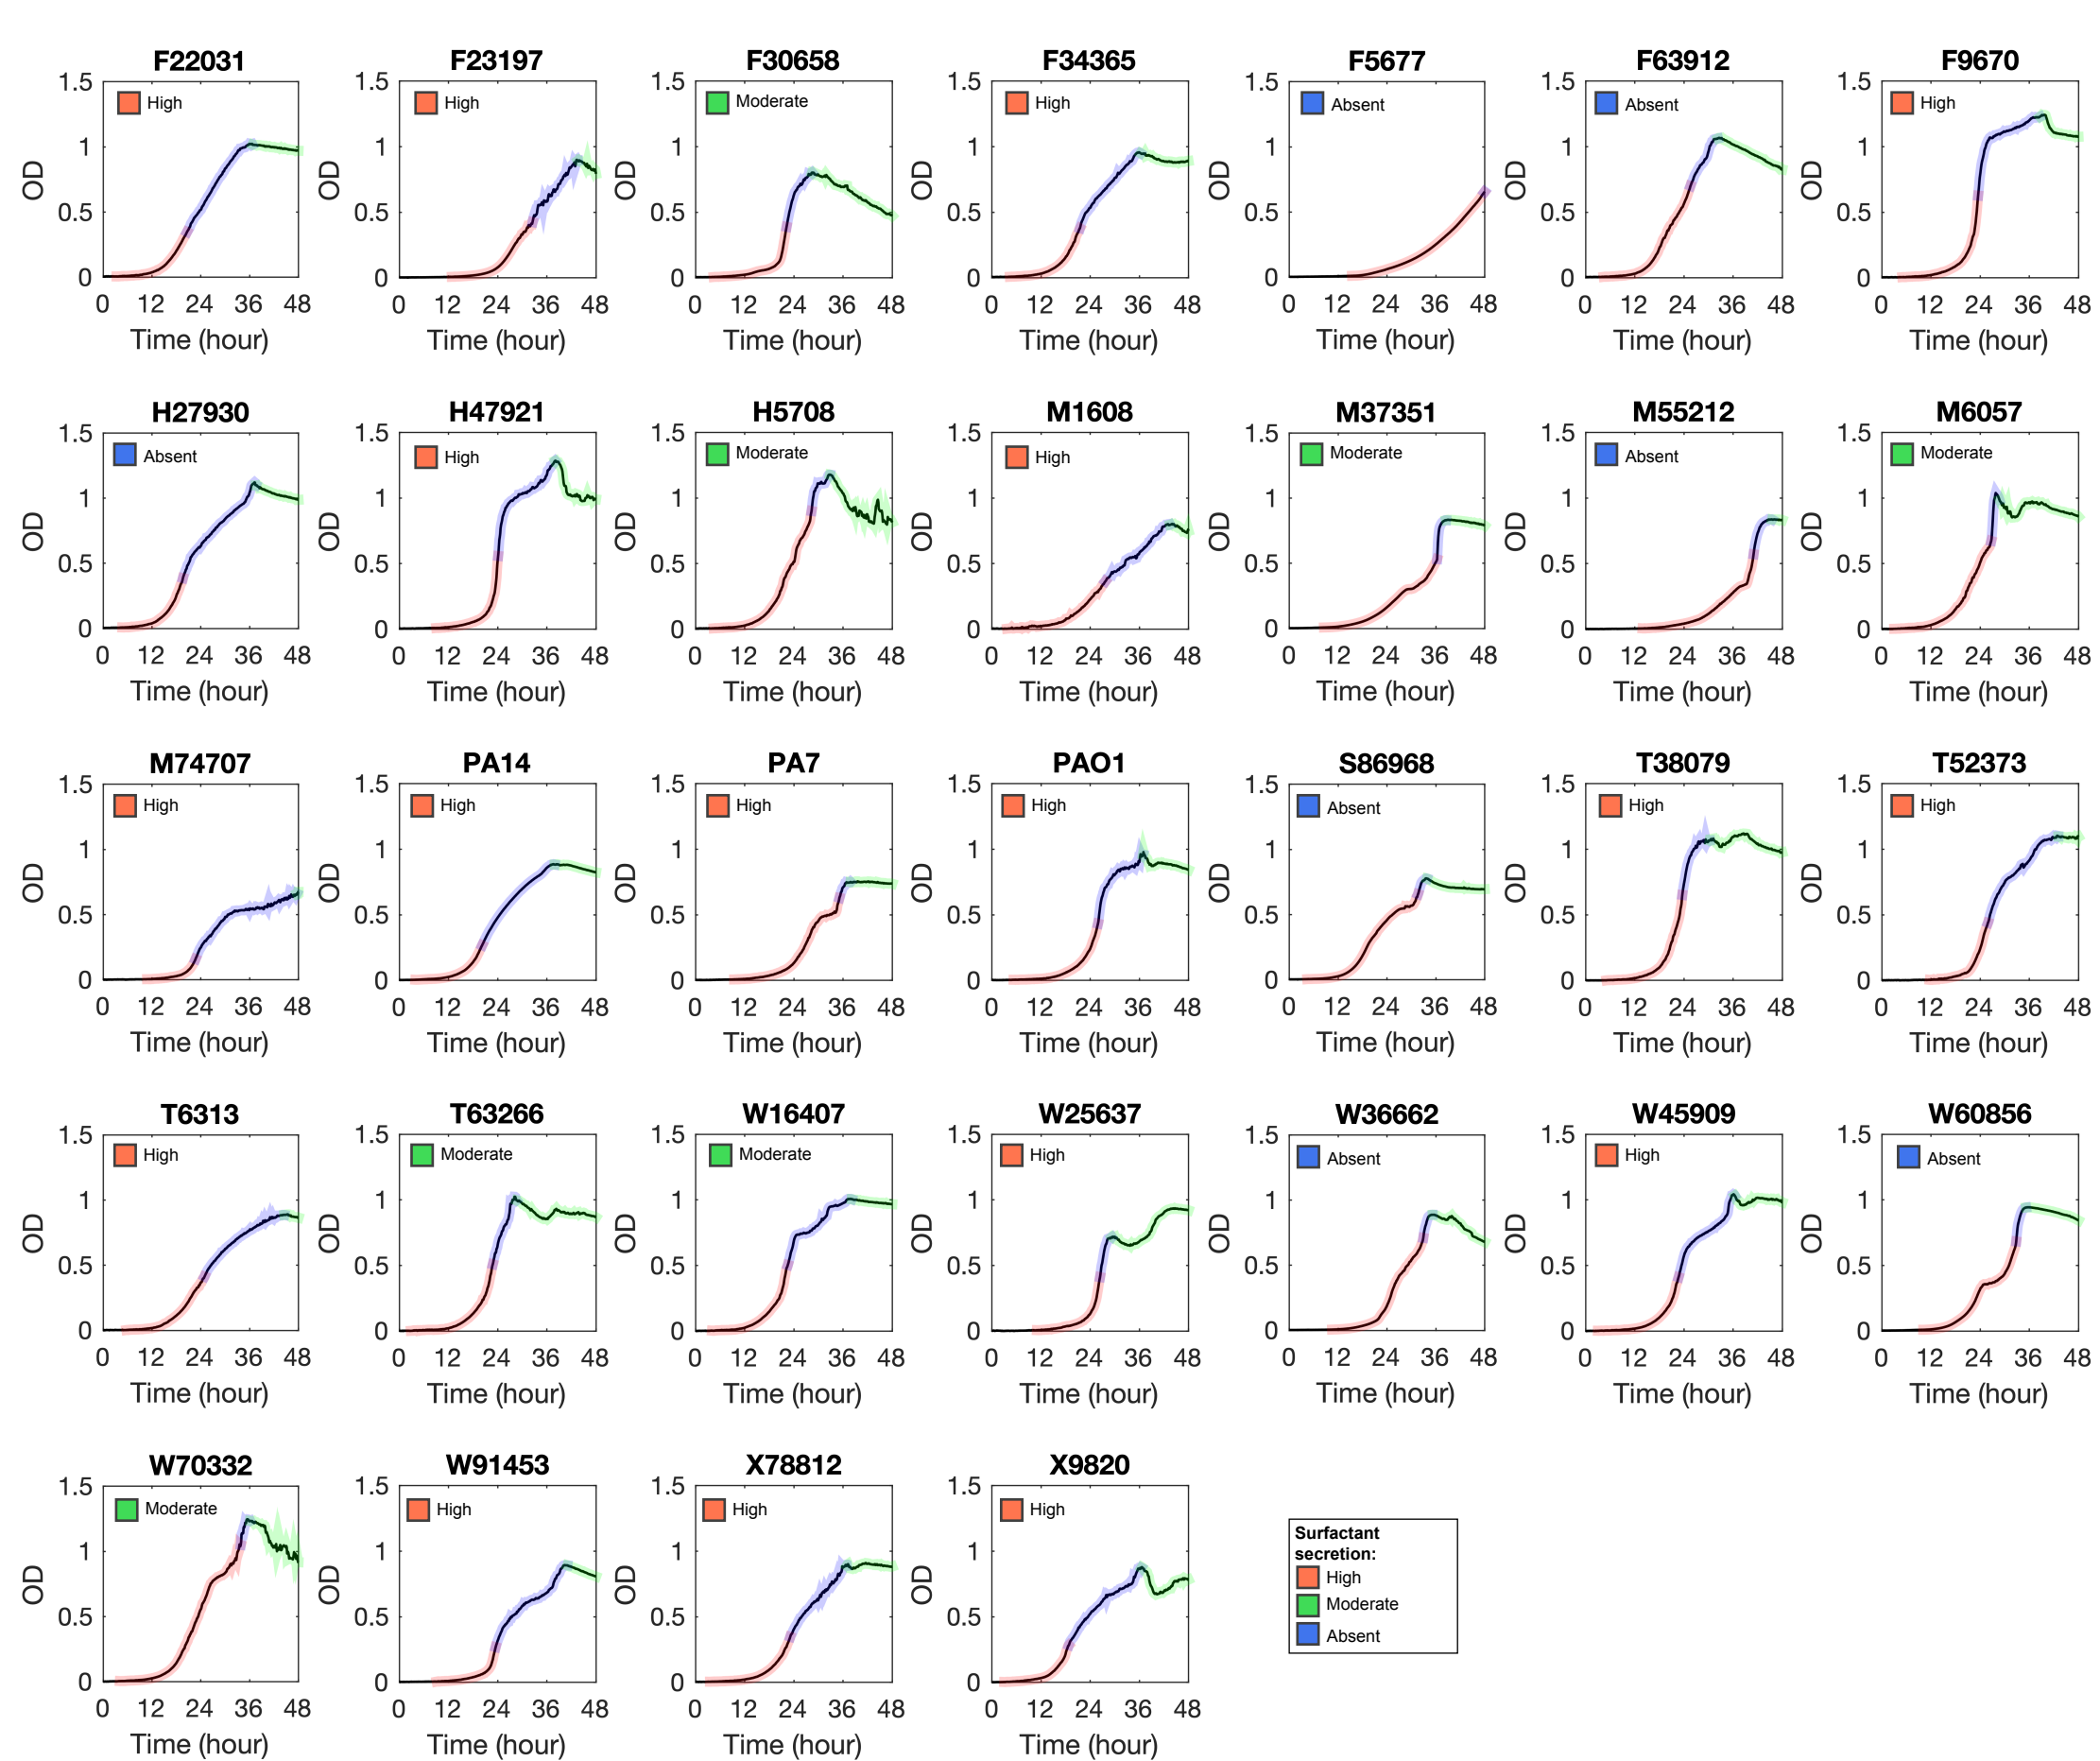

Supplement: supp [file elife-76119-supp-v1.zip]

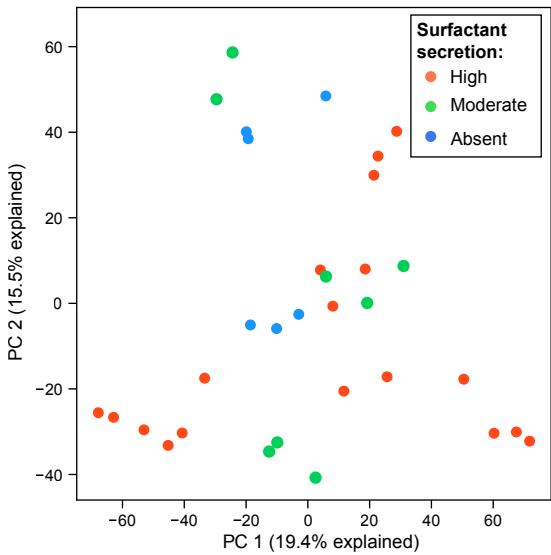

Supplement: supp [file elife-76119-supp-v1.zip]

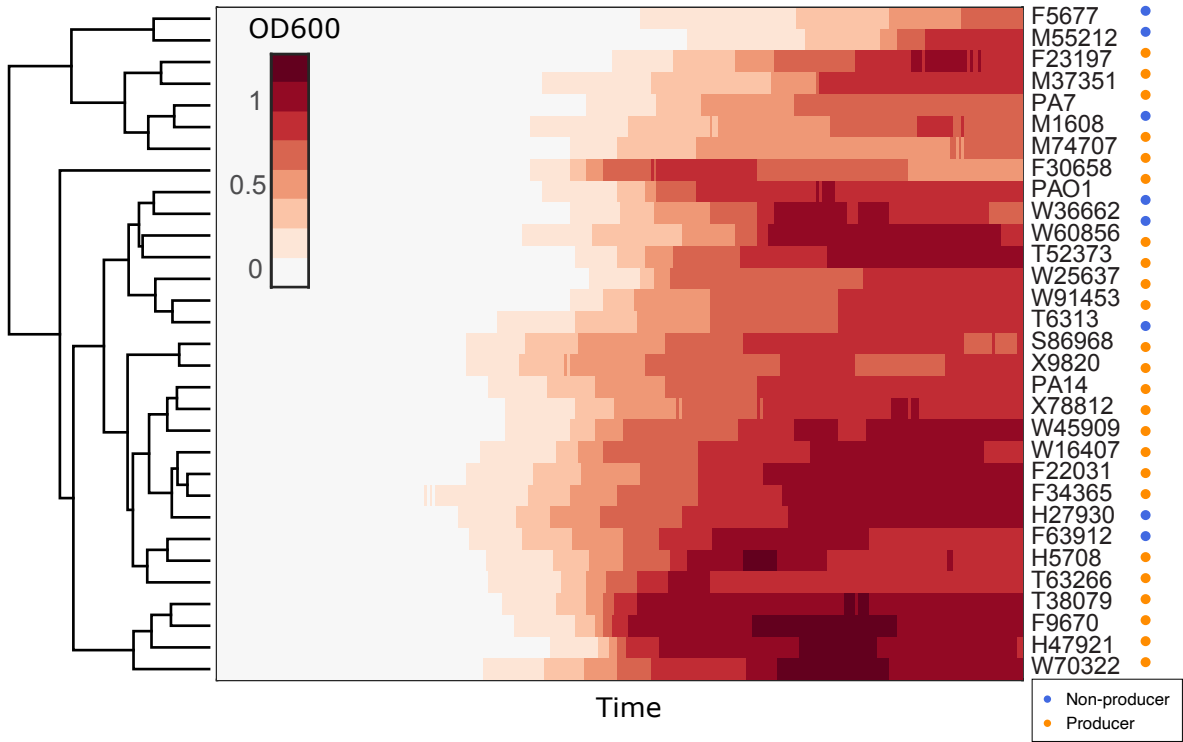

Supplement: supp [file elife-76119-supp-v1.zip]

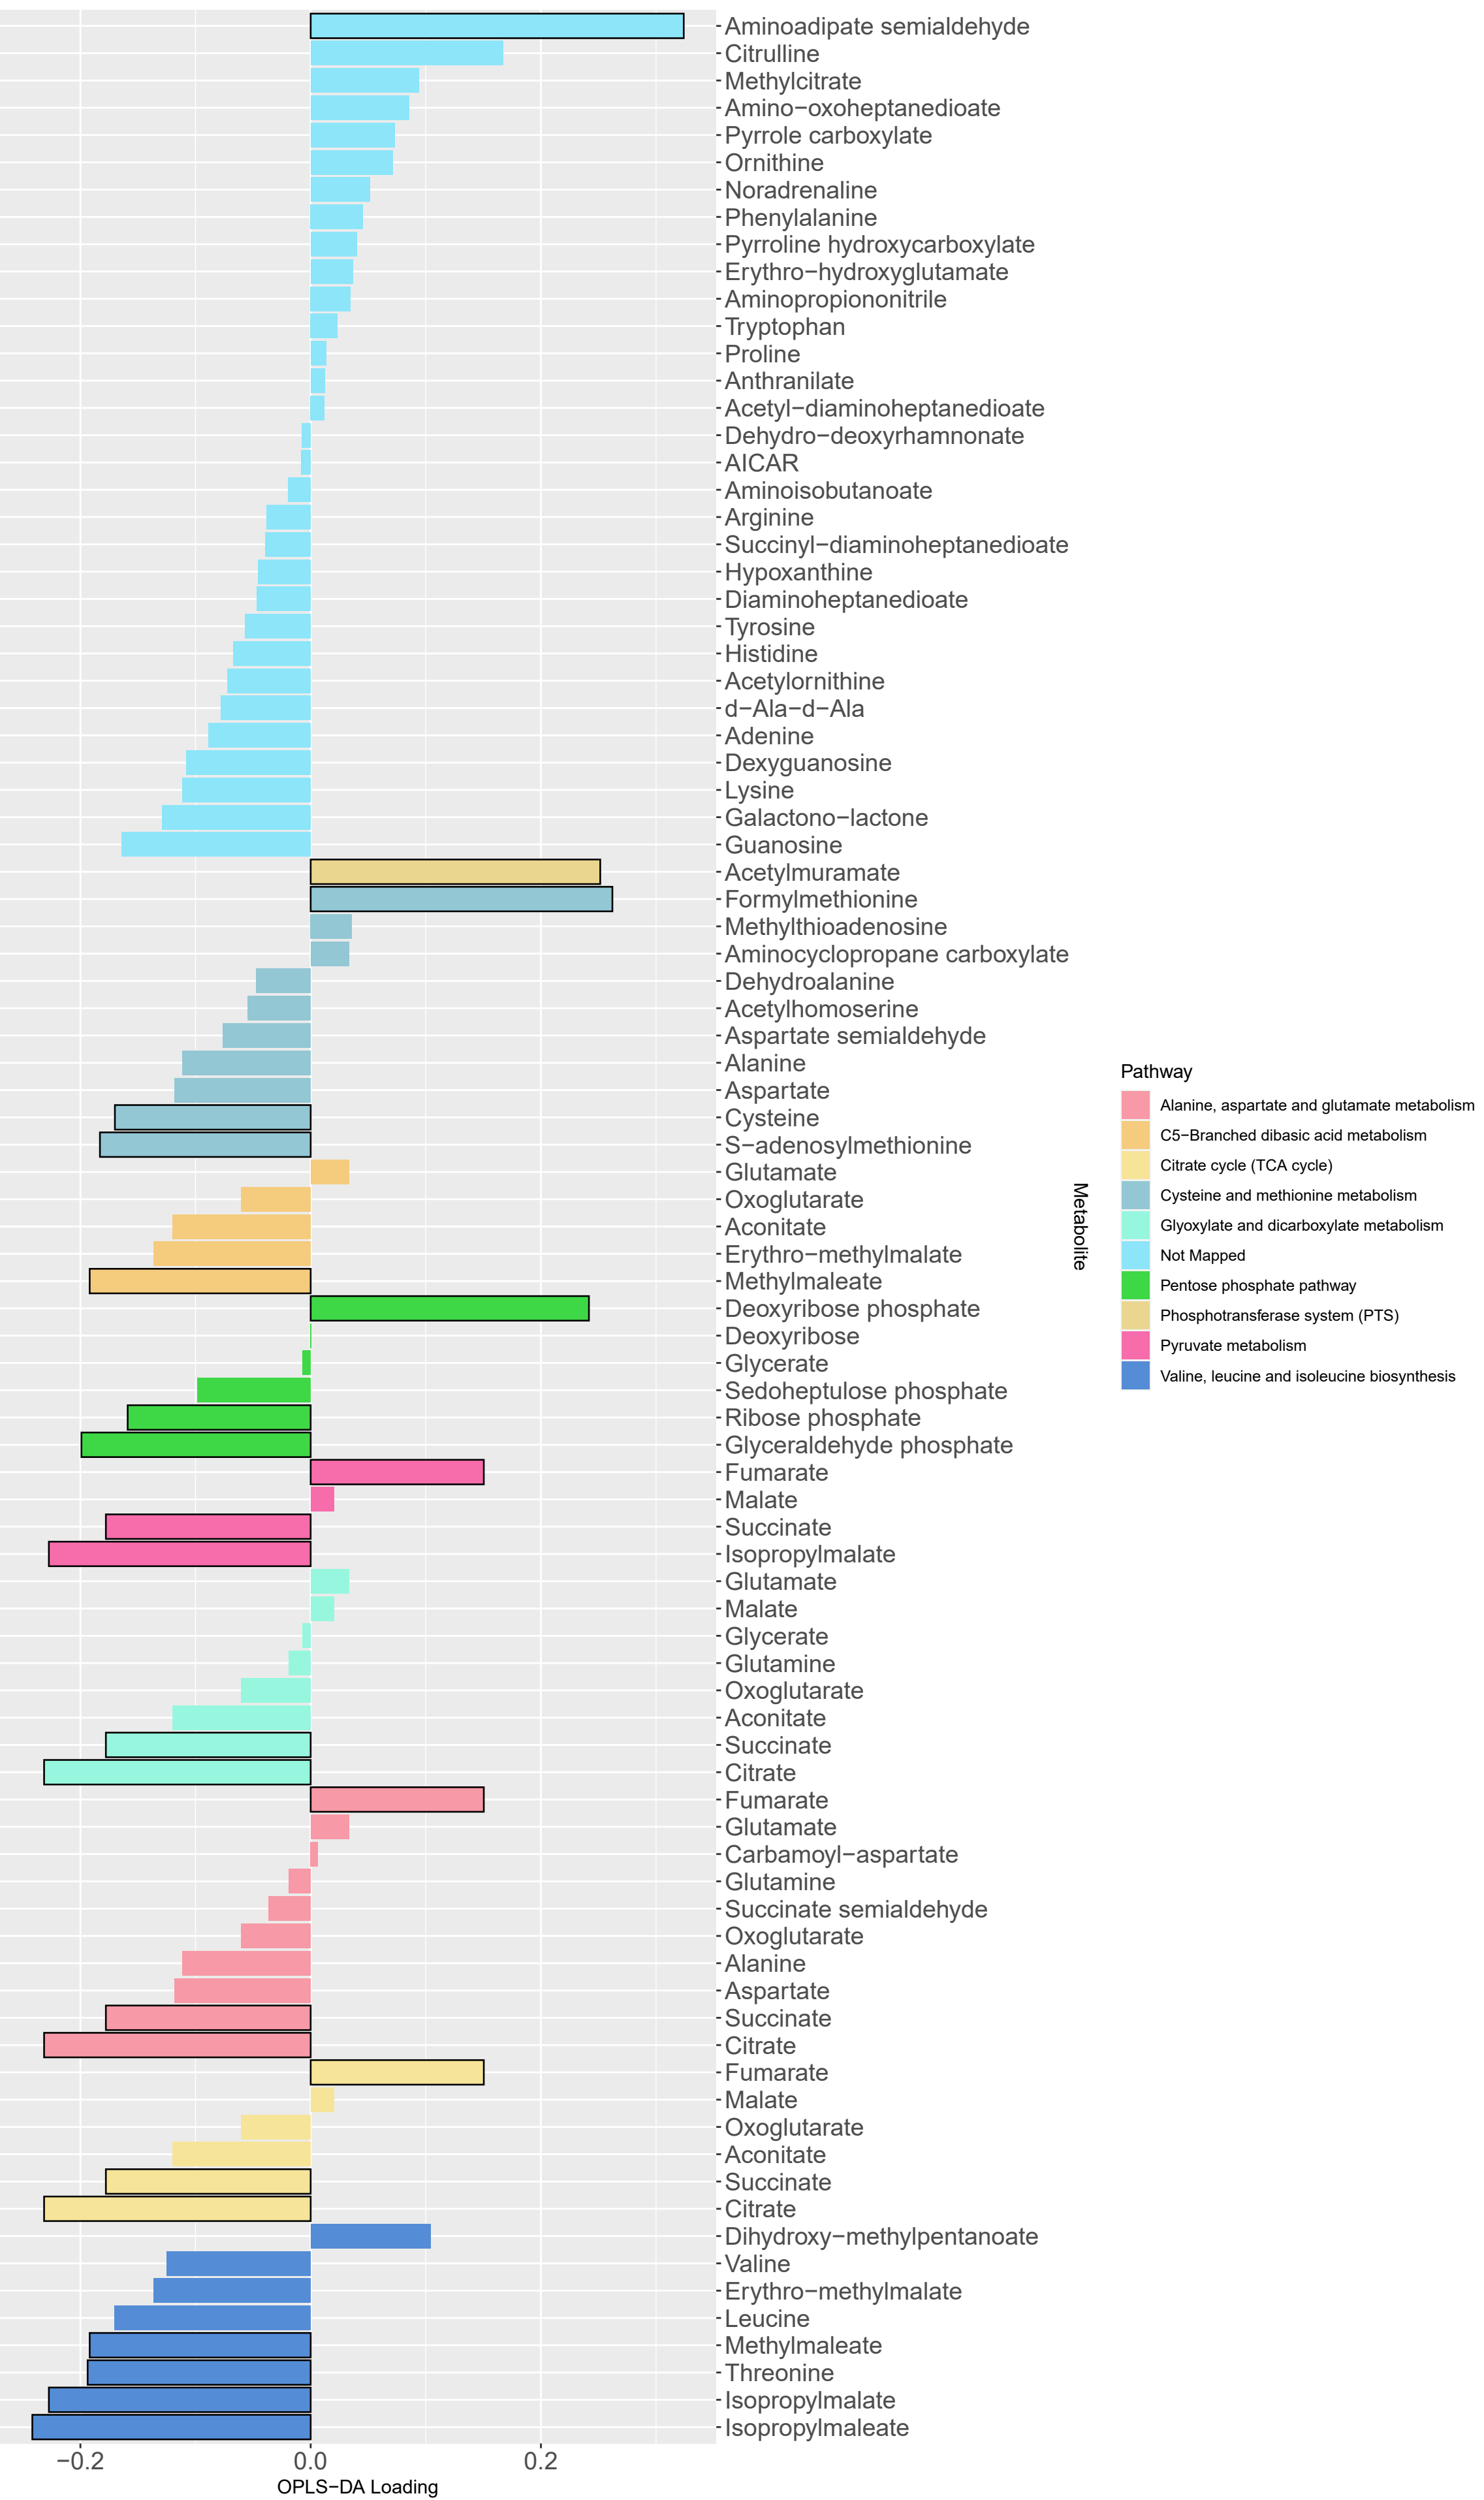

Supplement: supp [file elife-76119-supp-v1.zip]

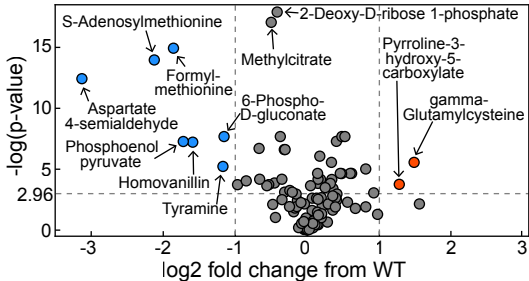

Supplement: supp [file elife-76119-supp-v1.zip]

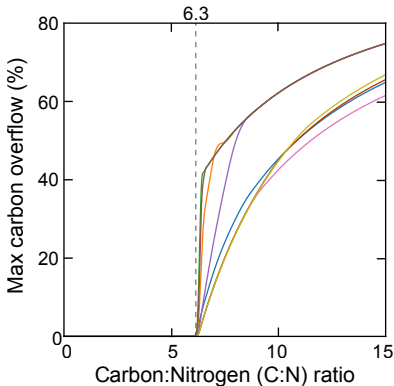

— HAA — monoRL — diRL — acetate  
— αKG — (iso)citrate — D-lactate — pyruvate

Supplement: supp [file elife-76119-supp-v1.zip]

- Non-producer (-)
- Producer (+, +/-)

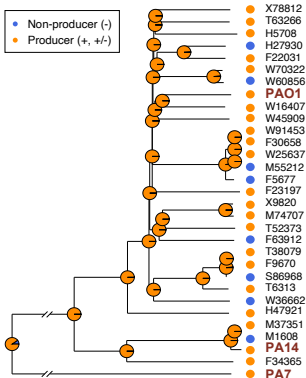

Supplement: supp [file elife-76119-supp-v1.zip]

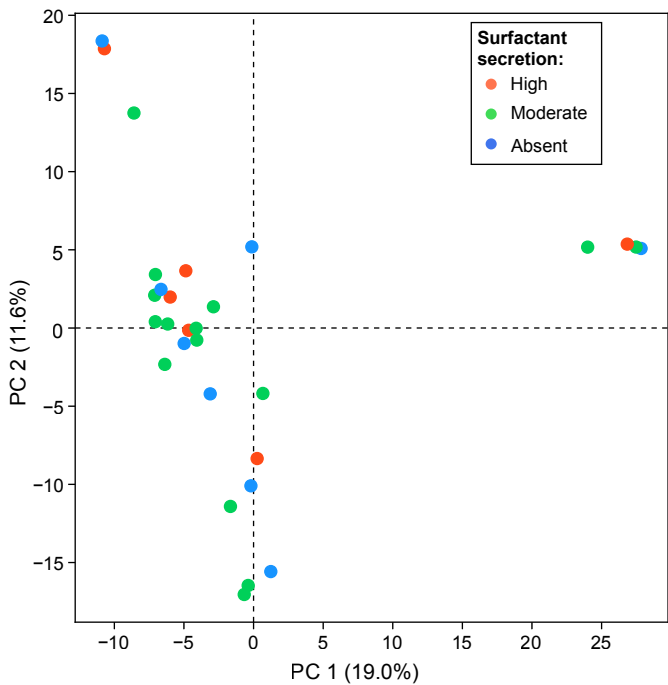

Supplement: supp [file elife-76119-supp-v1.zip]

A

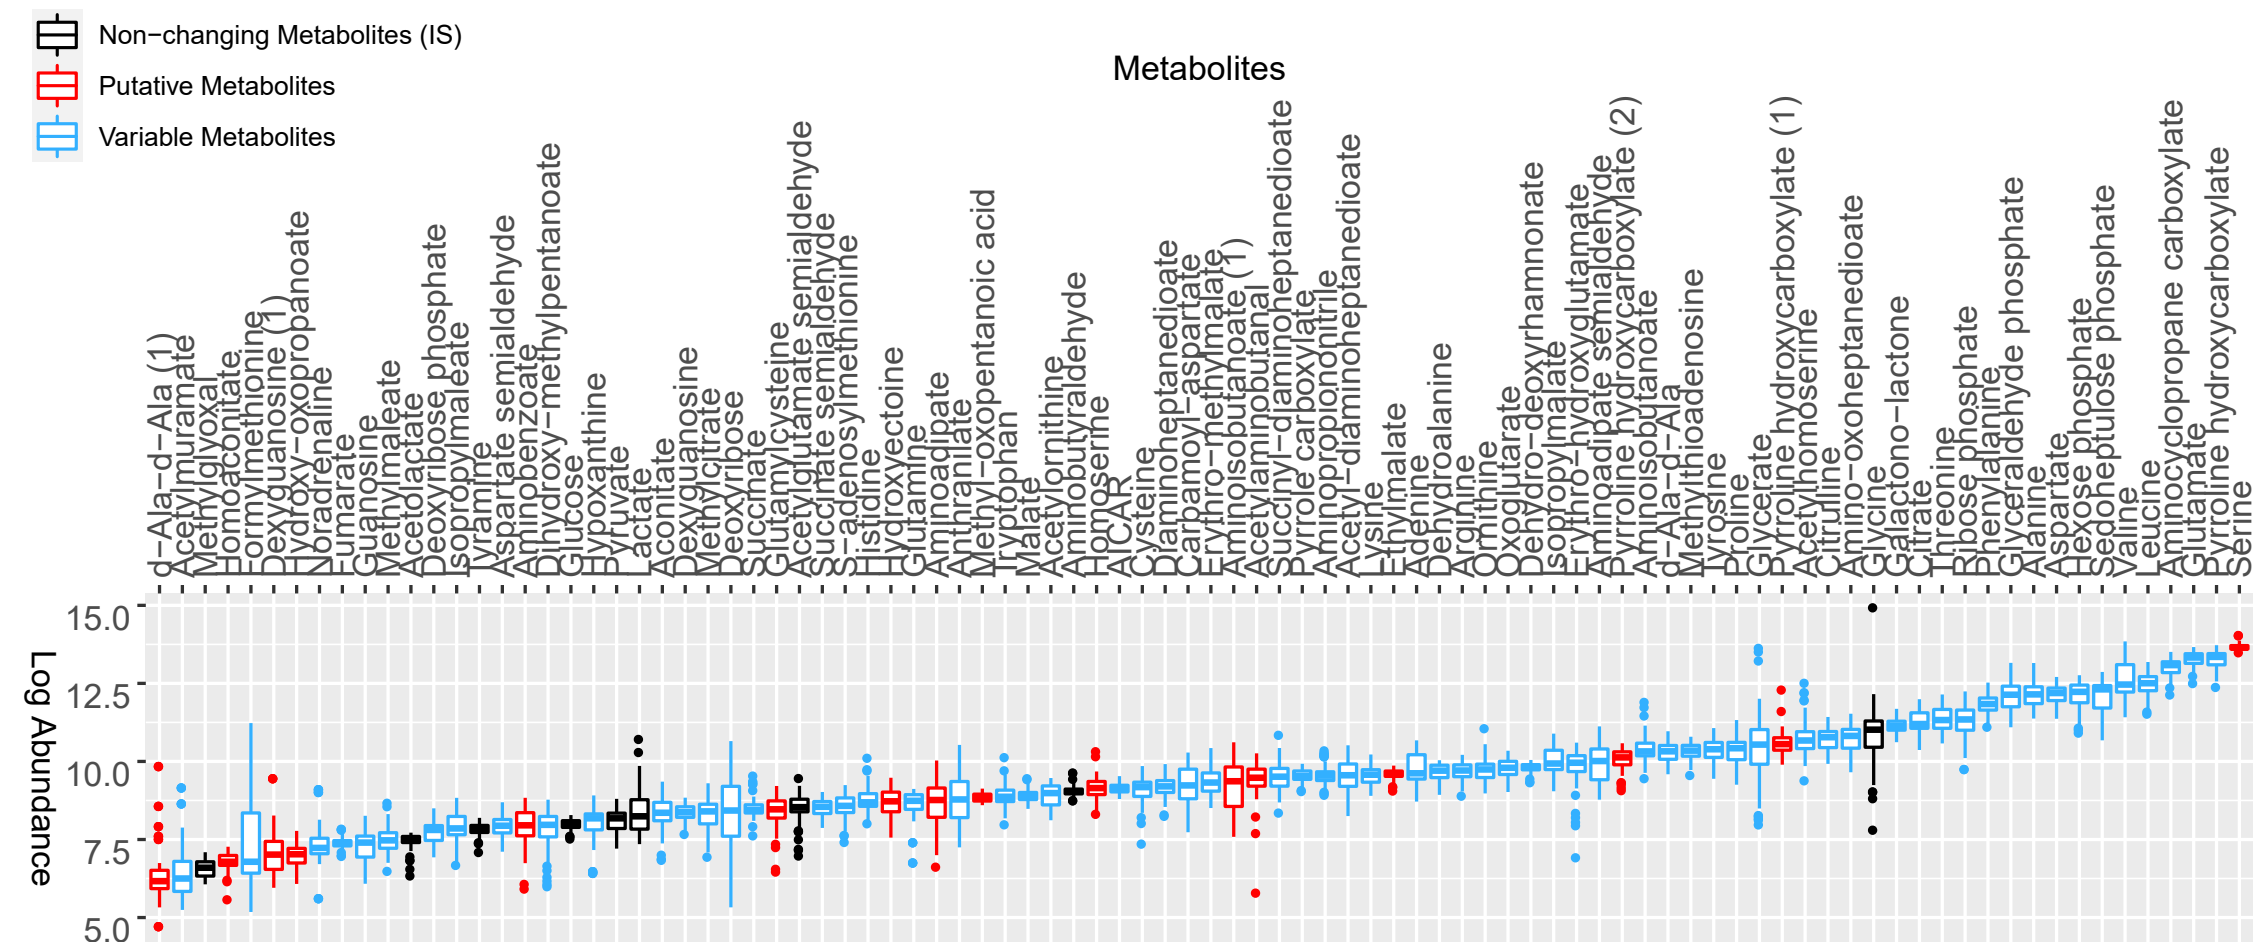

B Pre-Imputation

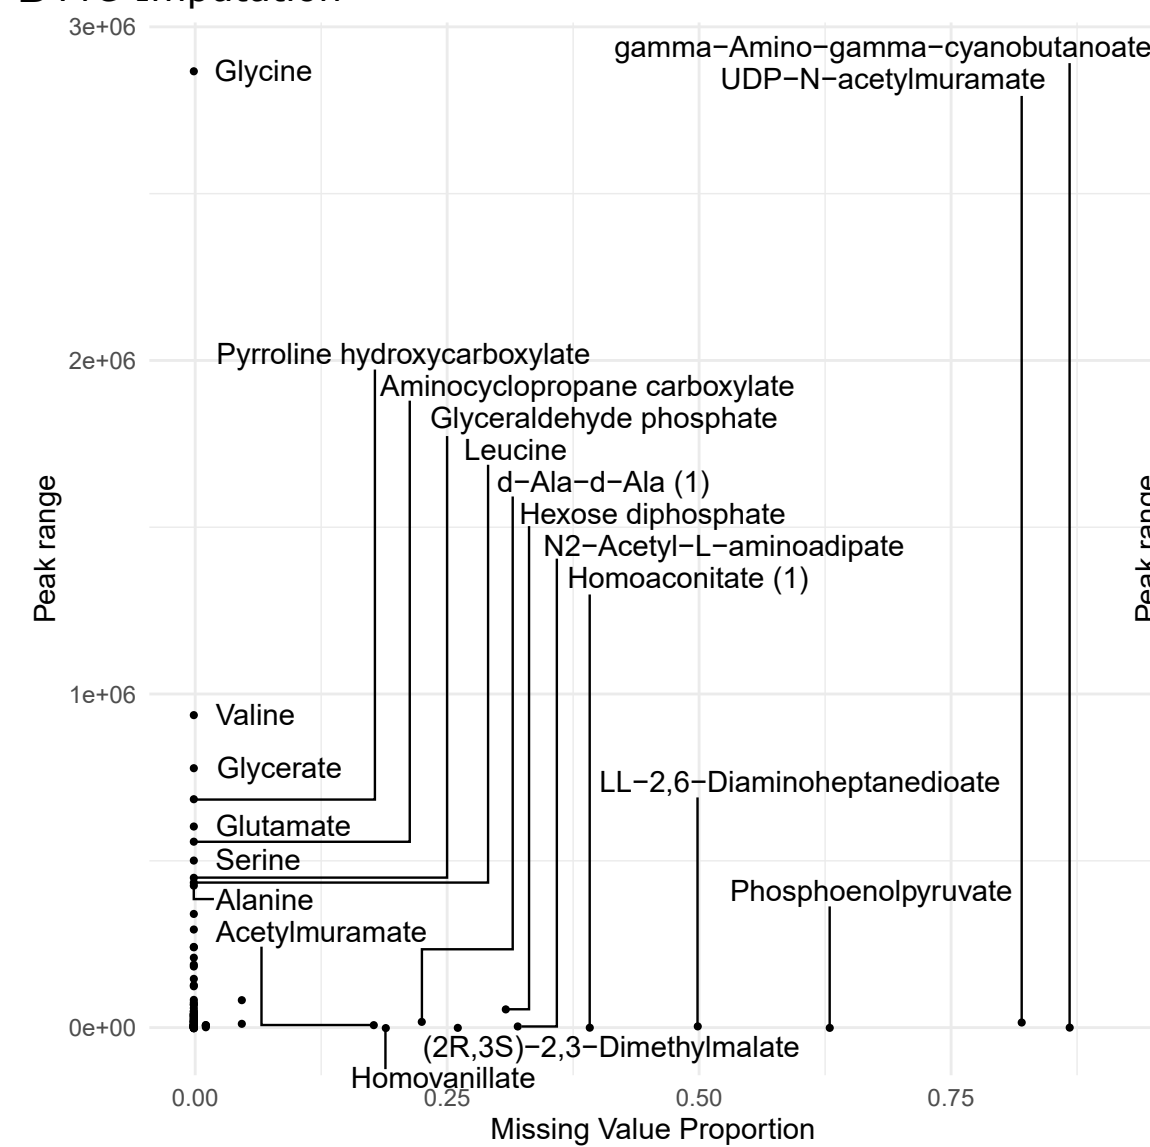

Post-Imputation

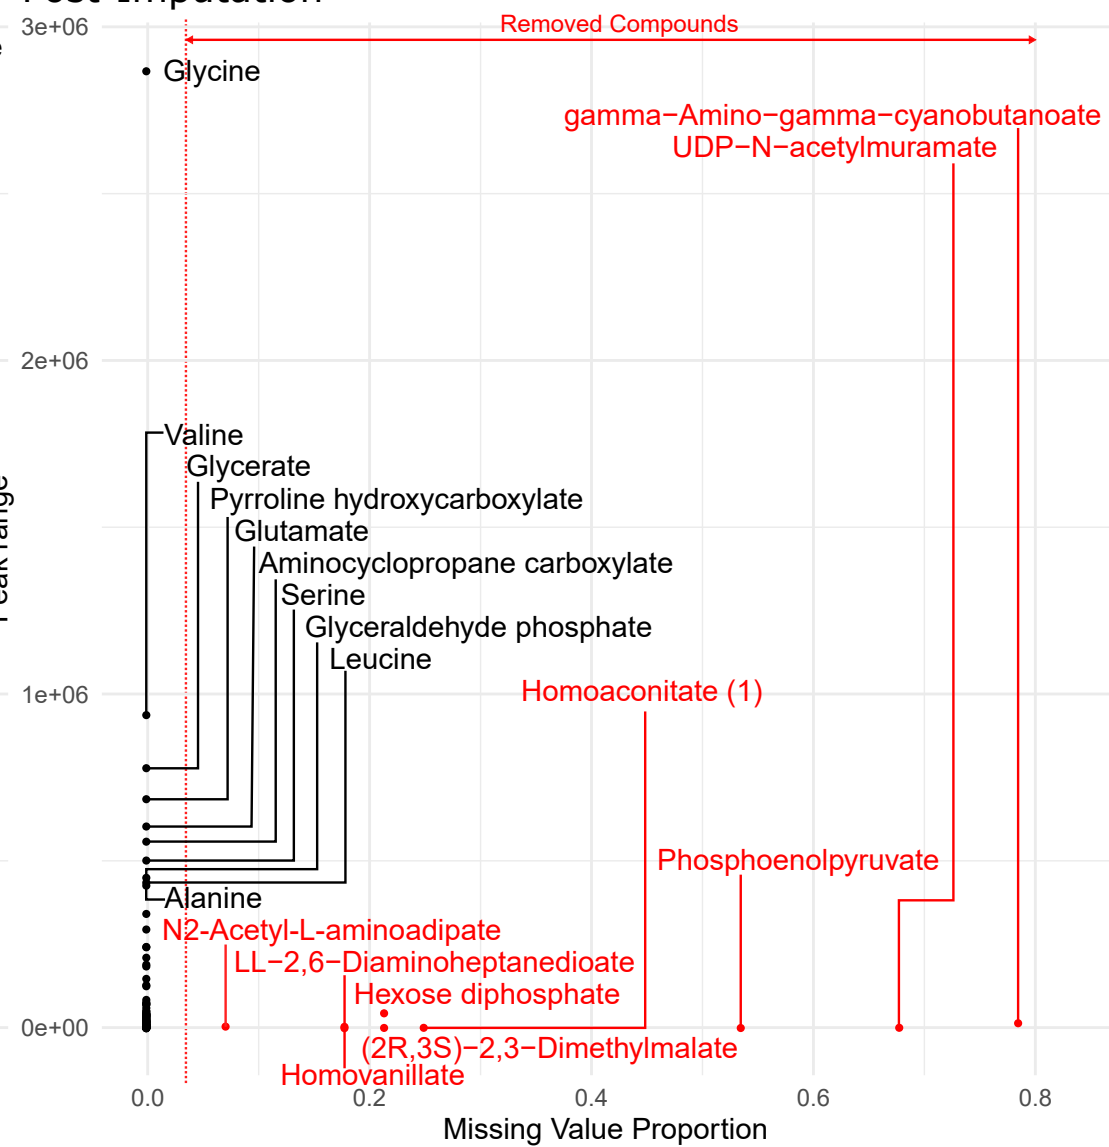

Supplement: supp [file elife-76119-supp-v1.zip › elife_poa_e76119_Figure_3_figure_supplement_1.pdf]

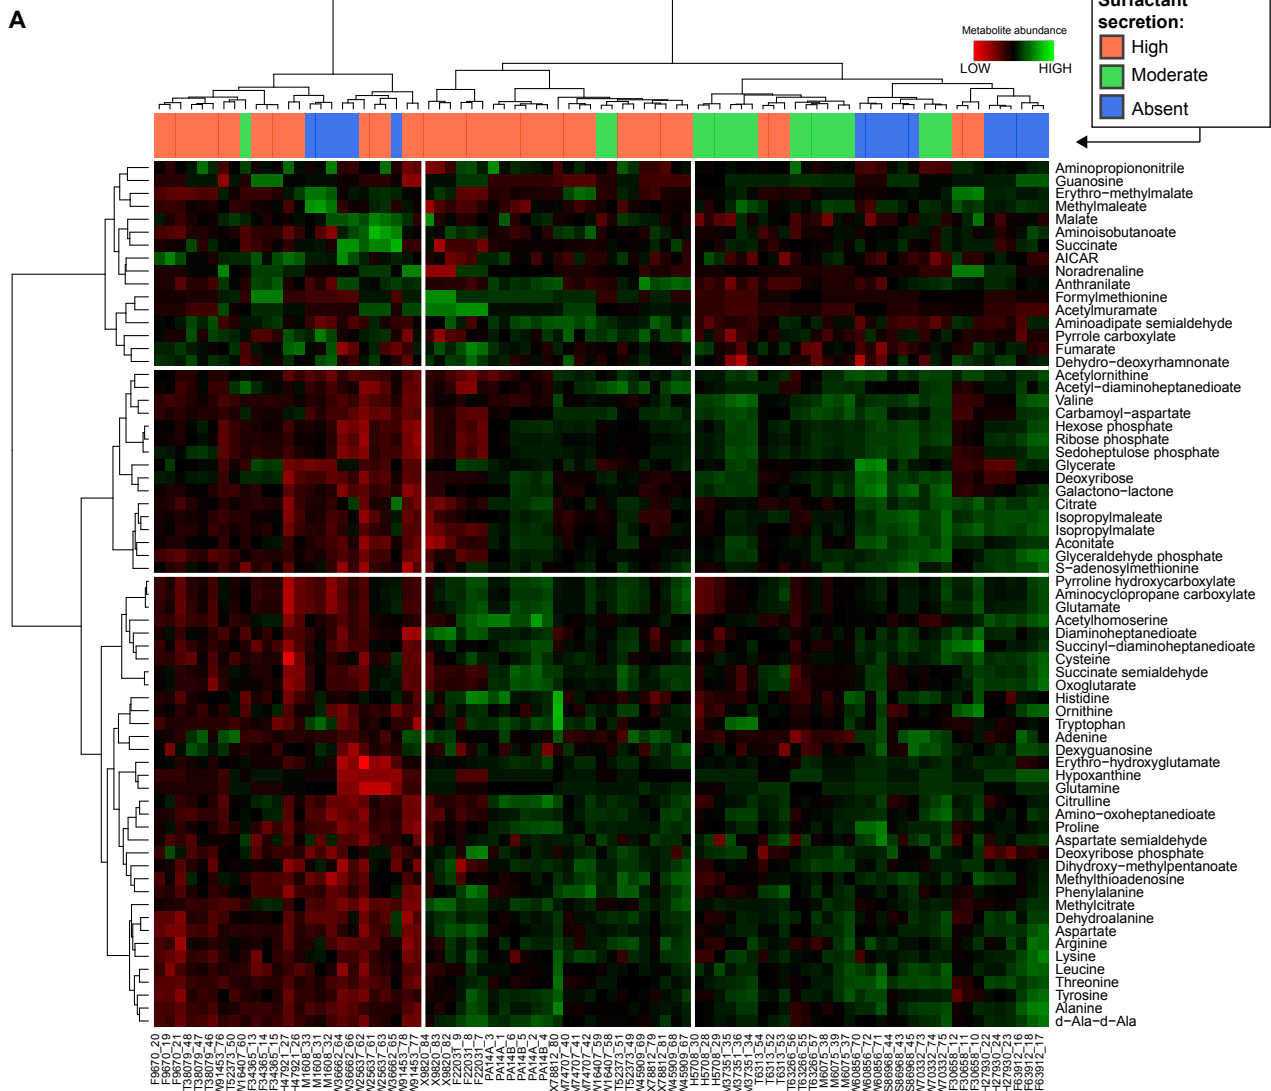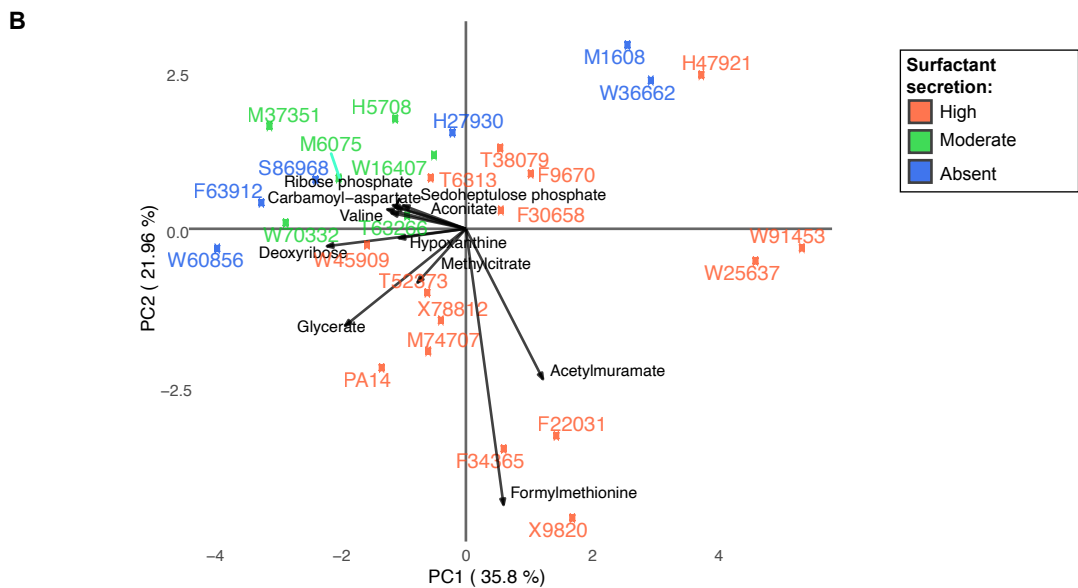

Supplement: supp [file elife-76119-supp-v1.zip › elife_poa_e76119_Figure_3_figure_supplement_2.pdf]

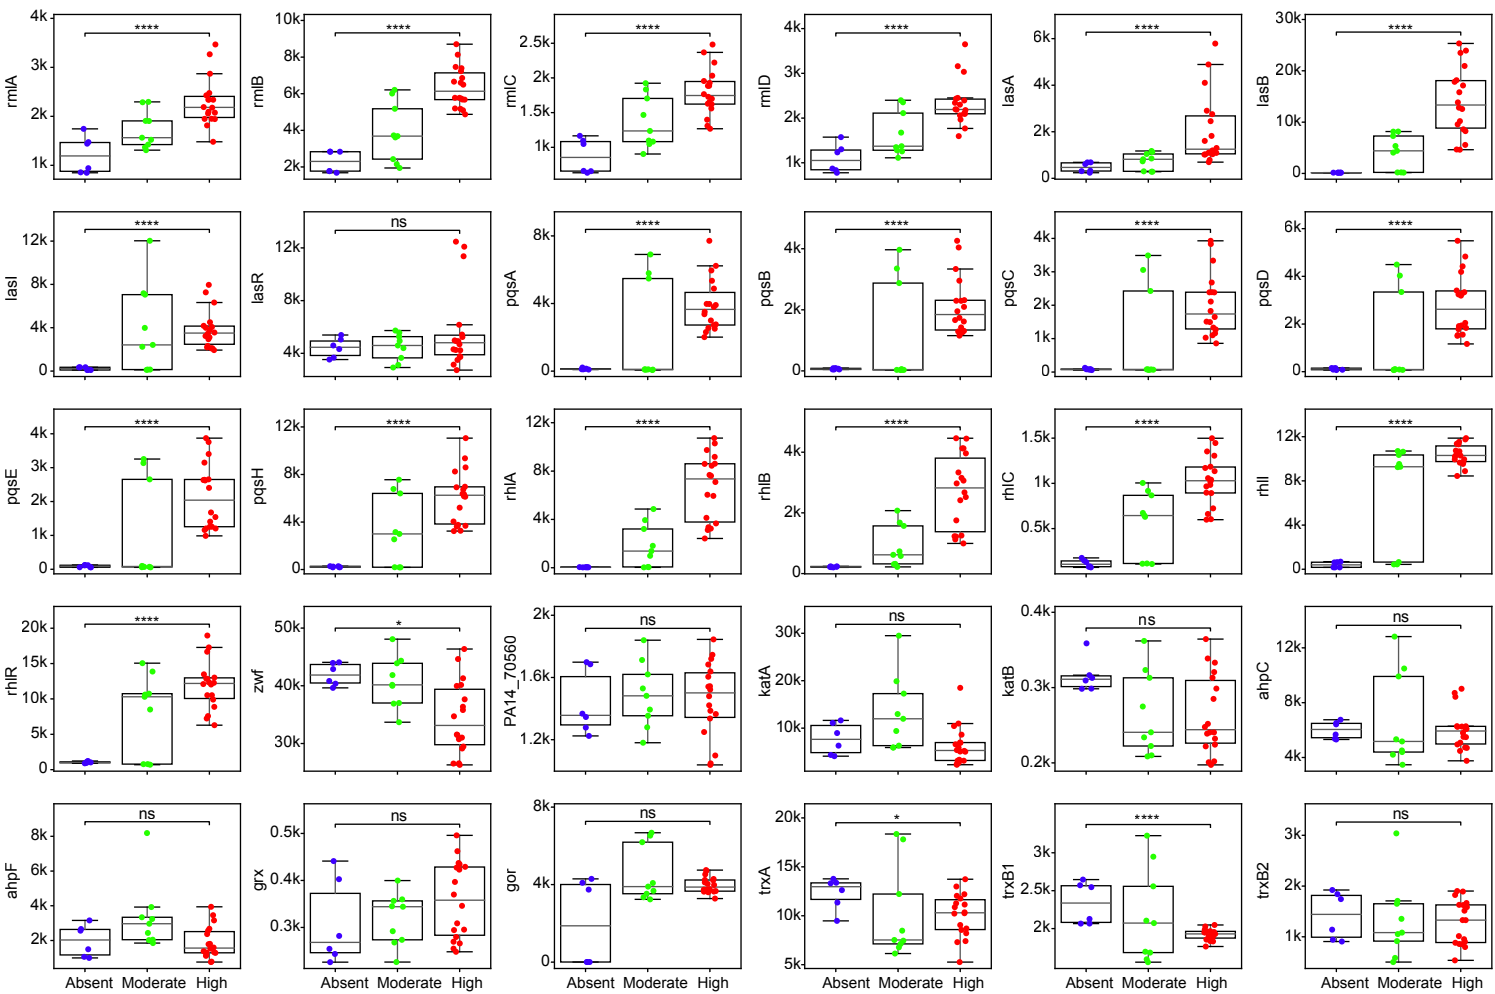

Supplement: supp [file elife-76119-supp-v1.zip › elife_poa_e76119_Figure_5_figure_supplement_2.pdf]
